# Supplementary material for: Copper–dienamine catalysis: γ-oxyamination of α,β-unsaturated aldehydes
Source: Royal Society of Chemistry journal article supplement (doi:10.1039/c4cy00271g), 2014-01-01
Supplement: c4cy00271g1.pdf [file c4cy00271g1.pdf]

**General procedure for  $\gamma$ -oxyamination of unsaturated aldehydes under metal-organocatalytic conditions (A)**

A mixture of an unsaturated aldehyde (0.75 mmol), TEMPO (0.25 mmol, 39 mg), CuBr (0.025 mmol, 3.7 mg), 2-NO<sub>2</sub>PhCO<sub>2</sub>H (0.025 mmol, 4.2 mg) and (S)- $\alpha,\alpha$ -diphenyl-2-pyrrolidinemethanol trimethylsilyl ether (0.025 mmol, 8.6 mg) in toluene (0.25 M, 1 mL) was added in a vial and stirred at 25°C for overnight. The solvent was removed under reduced pressure to produce a residue which was purified by column chromatography on a silica gel eluting with hexane and ether (99:1 v/v) to afford the oxyamination product.

**General procedure for one-pot  $\gamma$ -oxyamination of allylic alcohols under metal-organocatalytic conditions (B)**

A mixture of an allylic alcohol (0.75 mmol), TEMPO (0.25 mmol, 39 mg), CuBr (0.025 mmol, 3.7 mg), 2-NO<sub>2</sub>PhCO<sub>2</sub>H (0.025 mmol, 4.2 mg) and (S)- $\alpha,\alpha$ -diphenyl-2-pyrrolidinemethanol trimethylsilyl ether (0.025 mmol, 8.6 mg) in toluene (1M, 0.25 mL) was added in a vial and stirred at 25°C for overnight. The solvent was removed under reduced pressure to produce a residue which was purified by column chromatography on a silica gel eluting with hexane and ether (99:1 v/v) to afford the oxyamination product.

**General procedure for sequential  $\gamma$ -oxyamination of allylic alcohols under metal-organocatalytic conditions (C)**

A mixture of an allylic alcohol (0.75 mmol), TEMPO (0.025 mmol, 3.9 mg), CuBr (0.025 mmol, 3.7 mg) in DMF (1M, 0.25 mL) was added in a vial and oxygen was purged through it for a minute. Then, the reaction mixture was stirred at 25°C for overnight. 2-NO<sub>2</sub>PhCO<sub>2</sub>H (0.025 mmol, 4.2 mg), TEMPO (0.225 mmol, 35.1 mg) and (S)- $\alpha,\alpha$ -diphenyl-2-pyrrolidinemethanol trimethylsilyl ether (0.025 mmol, 8.6 mg) were added into the reaction mixture and kept stirring at 25°C for overnight. The reaction mixture was quenched with HCl solution and extracted with diethyl ether. The organic layer was dried (Na<sub>2</sub>SO<sub>4</sub>) and evaporated under reduced pressure. The resulted residue was purified by column chromatography on a silica gel eluting with hexane and ether (99:1 v/v) to afford the oxyamination product.

**Synthesis of (E)-methyl 4-(2,2,6,6-tetramethylpiperidin-1-yloxy)hex-2-enoate (2c)**

In a 100 ml round bottom flask equipped with magnetic stir bar, compound (E)-4-(2,2,6,6-tetramethylpiperidin-1-yloxy)hex-2-enal **2b** (390 mg, 1.54 mmol) was dissolved in a mixture of MeOH (8.0 mL), CH<sub>3</sub>CN (8.0 mL), water (8.0 mL) and cooled to 0 °C. KH<sub>2</sub>PO<sub>4</sub> (580 mg, 4.26 mmol) and NaClO<sub>2</sub> (366 mg, 3.23 mmol) were added subsequently to the ice cooled solution of the reaction mixture. H<sub>2</sub>O<sub>2</sub> (35% solution, 4.6 mL) was injected slowly to the reaction mixture at the same temperature. After the completion of the addition the reaction mixture was warmed up to RT. After 2 h the pH of the reaction mixture was adjusted to 3 with dilute HCl and saturated Na<sub>2</sub>SO<sub>3</sub> solution (30 mL) was added. The resulting mixture was extracted with CH<sub>2</sub>Cl<sub>2</sub> and dried over MgSO<sub>4</sub>. The organic layer was concentrated in vacuum and the residue was dissolved in 5.0 mL dry CH<sub>2</sub>Cl<sub>2</sub>. Methanol (213 mg, 4.62 mmol), N,N-dimethylaminopyridine (9.4 mg, 0.08 mmol) and Diisopropylcarbodiimide (195 mg, 1.54 mmol) were subsequently added to the reaction mixture and stirred for 2 h at rt. After completion of the reaction solvents were evaporated under vacuum and the crude product was subjected to FC on silica gel using 1% diethylether in hexane as eluent. Yield: 76 % (331.6 mg).

**Synthesis of (E)-methyl 4-hydroxyhex-2-enoate (2d)**

Compound **2c** (175 mg, 0.62 mmol) were dissolved in 20 ml THF: H<sub>2</sub>O: AcOH (1:1:3) solution. Zinc powder (1.6 g, 24.7 mmol) was added to the mixture and stirred at 65°C for 4 hrs. After cooling to room temperature the reaction mixture was diluted with ethyl acetate, filtered through celite and evaporated to dryness. The crude product was purified by silica gel flash chromatography. Yield: 43 % (38.2 mg).

**Synthesis of (E)-methyl 4-oxohex-2-enoate (2e)**

To a stirred solution of (E)-methyl 4-hydroxyhex-2-enoate **2d** (35 mg, 0.24 mmol) in 2.4 ml toluene, TEMPO (1.9 mg, 0.072 mmol), Fe(NO<sub>3</sub>)<sub>3</sub>·9H<sub>2</sub>O (4.8 mg, 0.012 mmol) and NaCl (0.7 mg, 0.012 mmol) were added subsequently. Then the reaction mixture was placed under oxygen through a balloon and stirred for 2 h. After completion of the reaction the resulting mixture was evaporated and purified by silica gel column chromatography (2 % diethylether in hexane). Yield: 51 % (17.6 mg).<sup>i</sup>

To a stirred solution of (E)-methyl 4-(2,2,6,6-tetramethylpiperidin-1-yloxy)hex-2-enoate **2c** (70 mg, 0.25 mmol) in 1.2 ml CH<sub>2</sub>Cl<sub>2</sub>, *m*CPBA (60 mg, 0.35 mmol) was added portion wise at 0°C. After 2 h the reaction mixture was treated with aqueous Na<sub>2</sub>SO<sub>3</sub> solution, extracted with CH<sub>2</sub>Cl<sub>2</sub> and concentrated in vacuo. The crude product was purified by silica gel flash chromatography (2 % diethylether in hexane). Yield: 57 % (20.1 mg).<sup>ii</sup>

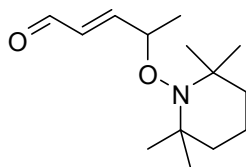

**(E)-4-(2,2,6,6-tetramethylpiperidin-1-yloxy)pent-2-enal (1b)**  $R_f$  = 0.44 in 1:5 v/v ether/hexane; colorless oil; yield 40.7 mg (0.17 mmol, 68 %). IR (KBr): 2932, 1695, 1376, 1133, 976  $\text{cm}^{-1}$ .  $^1\text{H}$  NMR ( $\text{CDCl}_3$ , 400MHz)  $\delta$ : 1.07-1.44 (21H, m), 4.58 (1H, m), 6.16 (1H, dd,  $J$  = 7.6, 16 Hz), 6.87 (1H, dd,  $J$  = 6.8, 15.8 Hz), 9.54 (1H, d,  $J$  = 9.8 Hz) ppm.  $^{13}\text{C}$  NMR ( $\text{CDCl}_3$ , 100MHz)  $\delta$ : 17.6, 20.5, 20.7, 20.8, 34.6, 34.9, 40.5, 79.5, 130.8, 160.1, 194.0 ppm. HRMS  $m/z$  (FAB,  $[\text{M}+\text{H}]^+$ ): calcd for  $\text{C}_{14}\text{H}_{25}\text{NO}_2$ : 240.1964; found: 240.1961

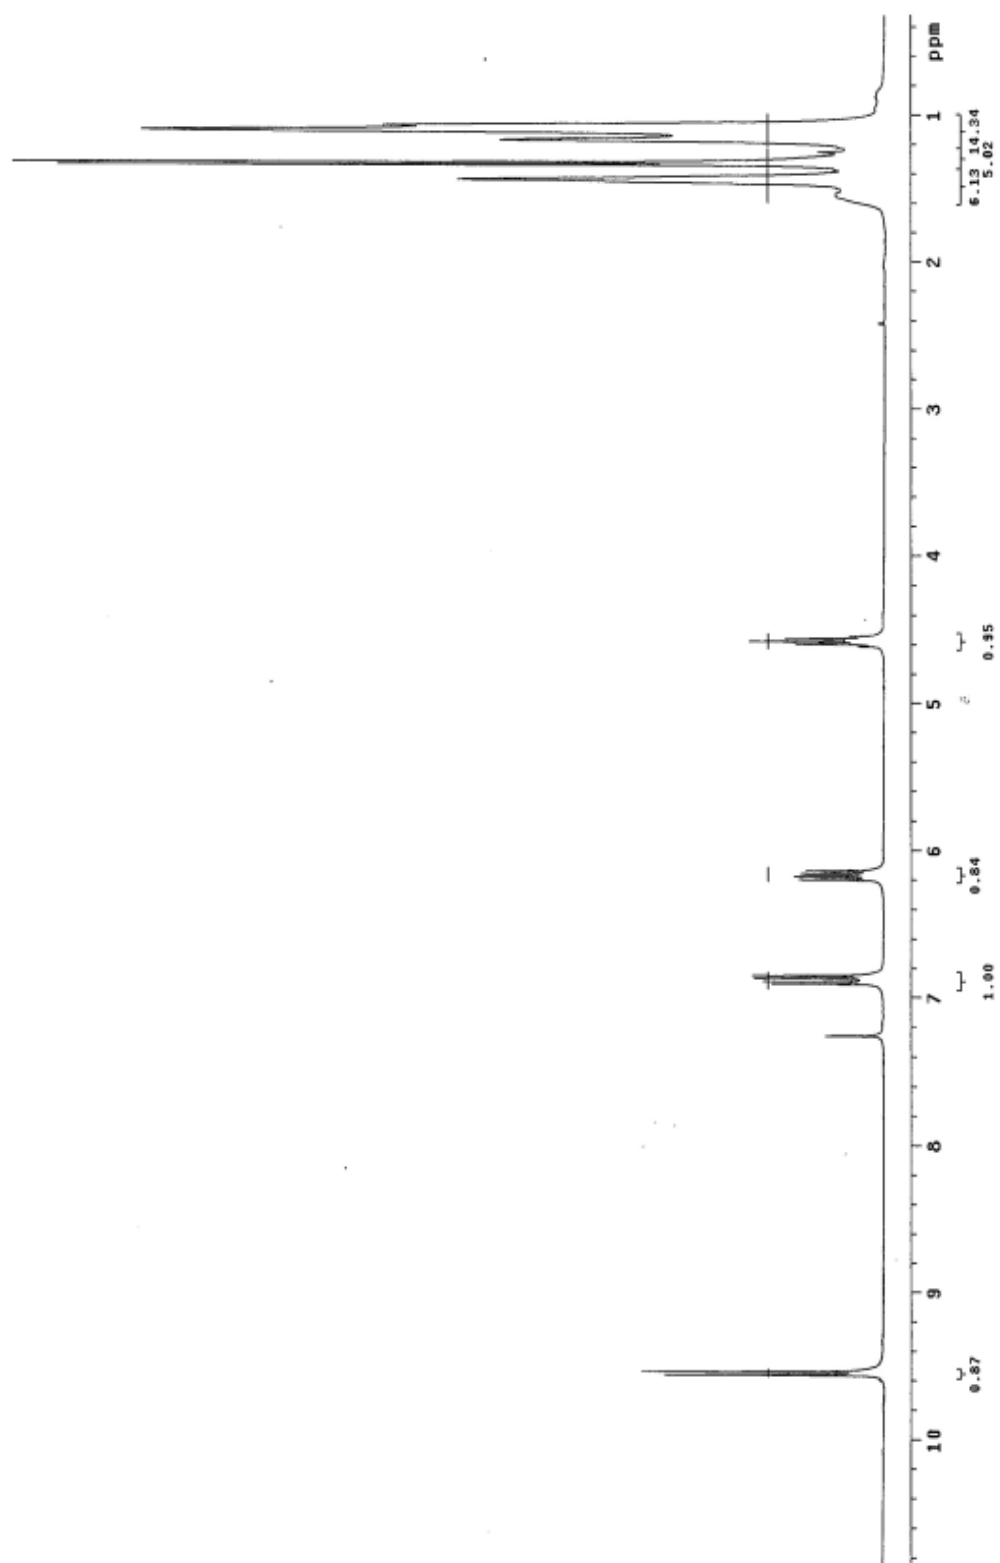

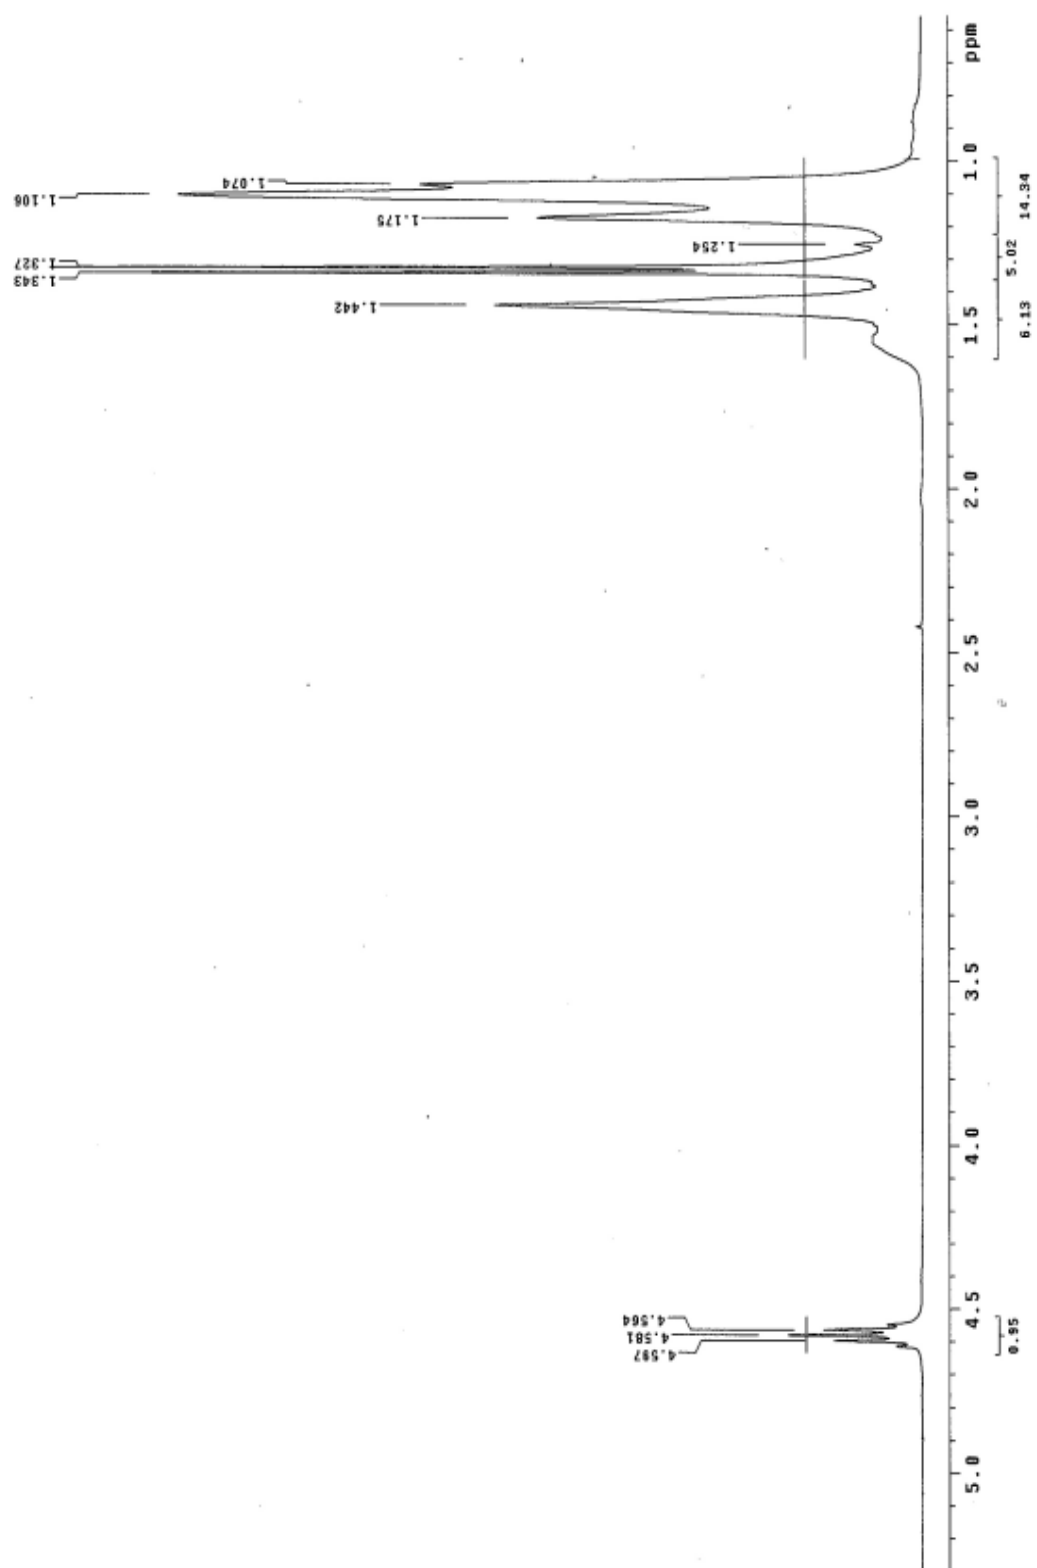

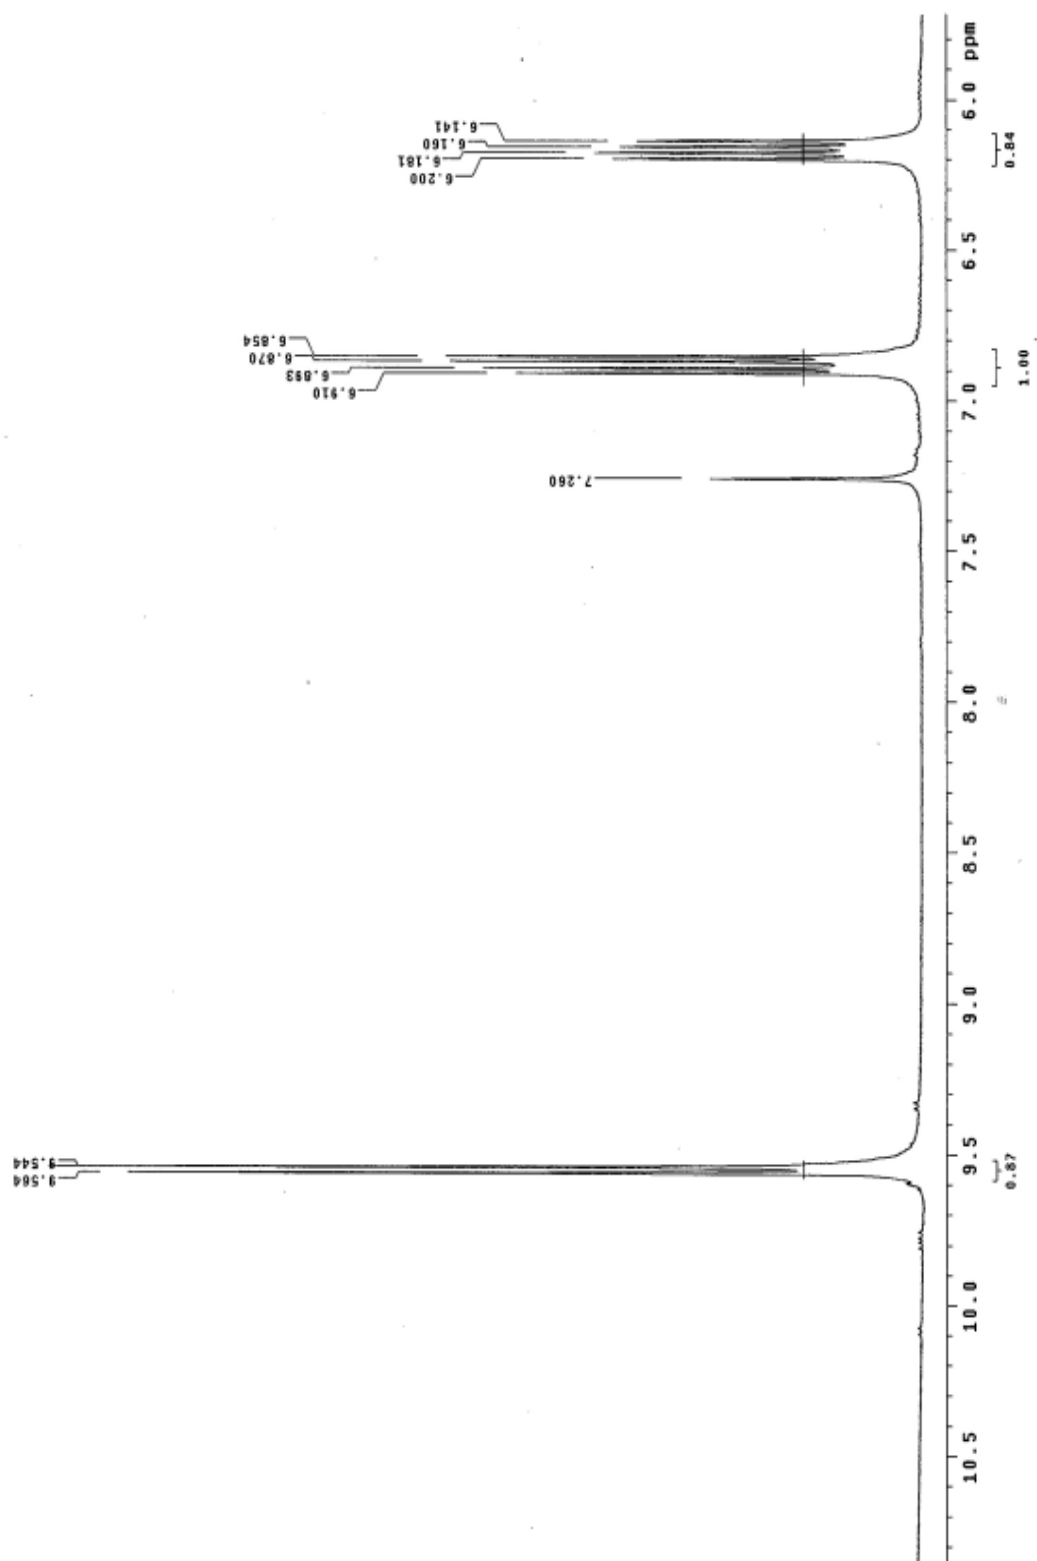

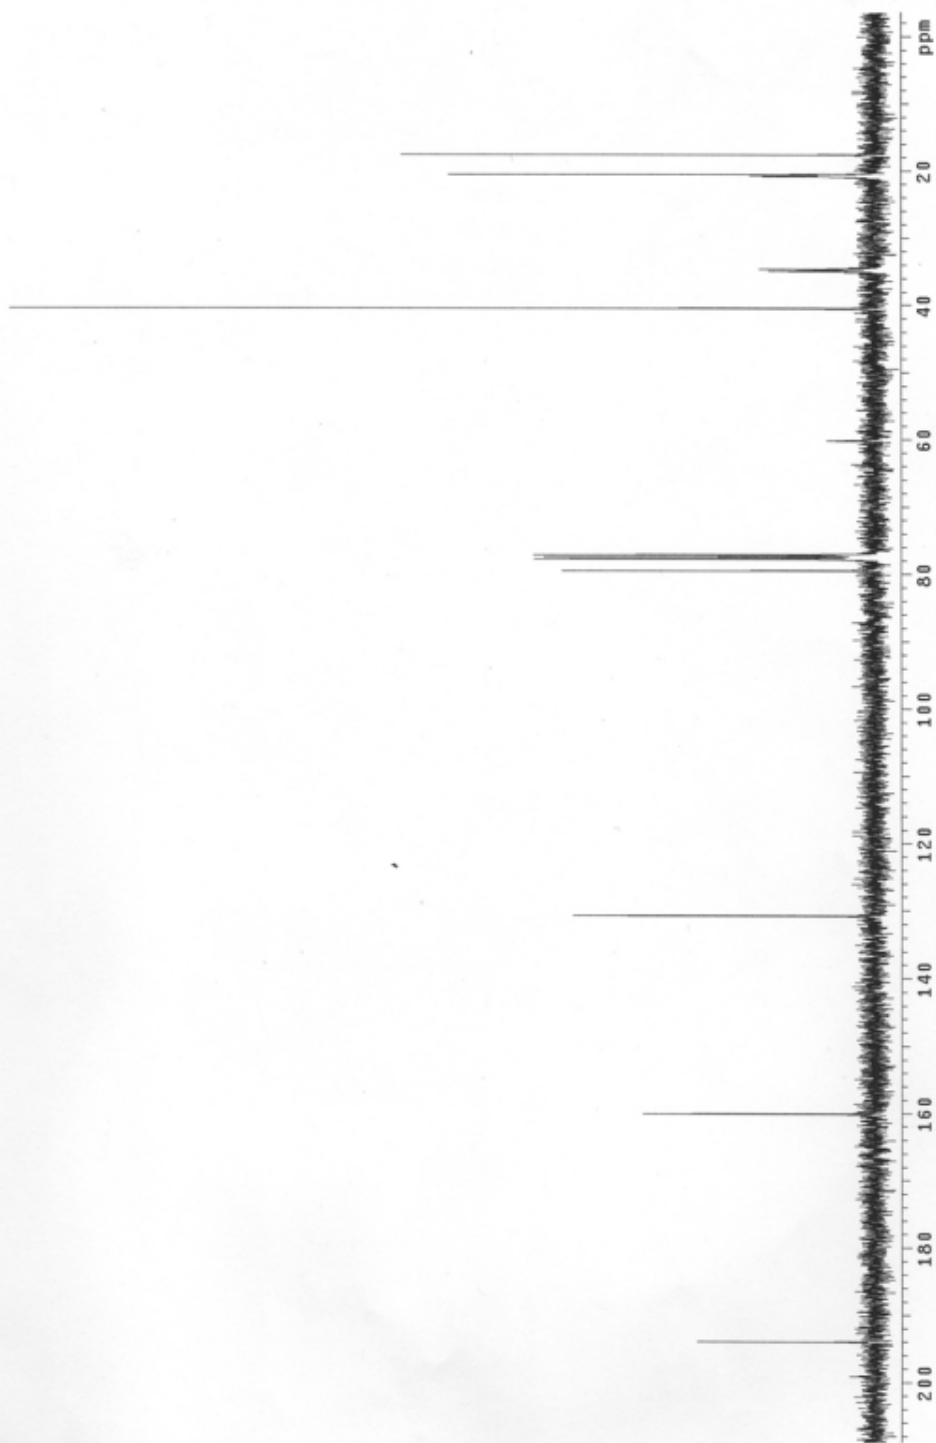

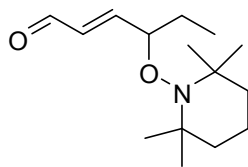

**(E)-4-(2,2,6,6-tetramethylpiperidin-1-yloxy)hex-2-enal (2b)**  $R_f = 0.44$  in 1:5 v/v ether/hexane; colorless oil; yield 50.6 mg (0.2000 mmol, 80 %). IR (KBr): 2935, 1695, 1377, 1258, 977  $\text{cm}^{-1}$ .  $^1\text{H}$  NMR ( $\text{CDCl}_3$ , 400MHz)  $\delta$ : 0.89-1.87 (23H, m), 4.40 (1H, m), 6.15 (1H, dd,  $J = 7.6, 16$  Hz), 6.87 (1H, dd,  $J = 7.6, 16$  Hz), 9.58 (1H, d,  $J = 7.6$  Hz) ppm.  $^{13}\text{C}$  NMR ( $\text{CDCl}_3$ , 100MHz)  $\delta$ : 9.8, 17.6, 20.7, 20.8, 27.1, 34.4, 35.0, 40.6, 84.7, 132.3, 159.3, 193.9 ppm. HRMS  $m/z$  (FAB,  $[\text{M}+\text{H}]^+$ ): calcd for  $\text{C}_{15}\text{H}_{27}\text{NO}_2$ : 254.2120; found: 254.2118



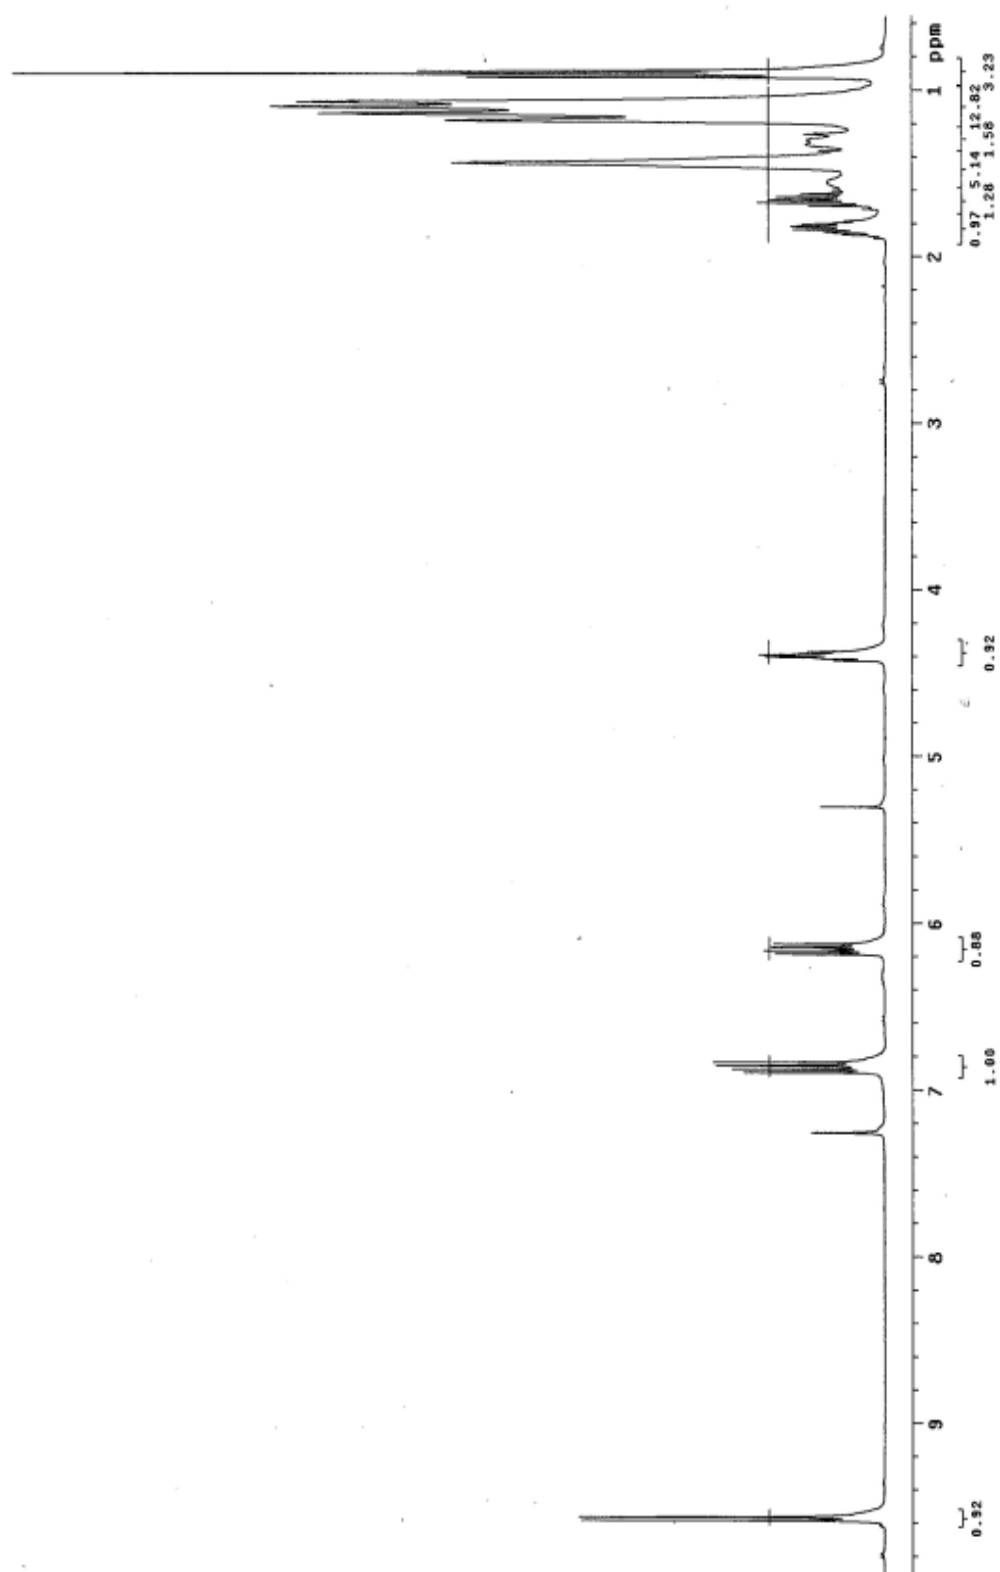

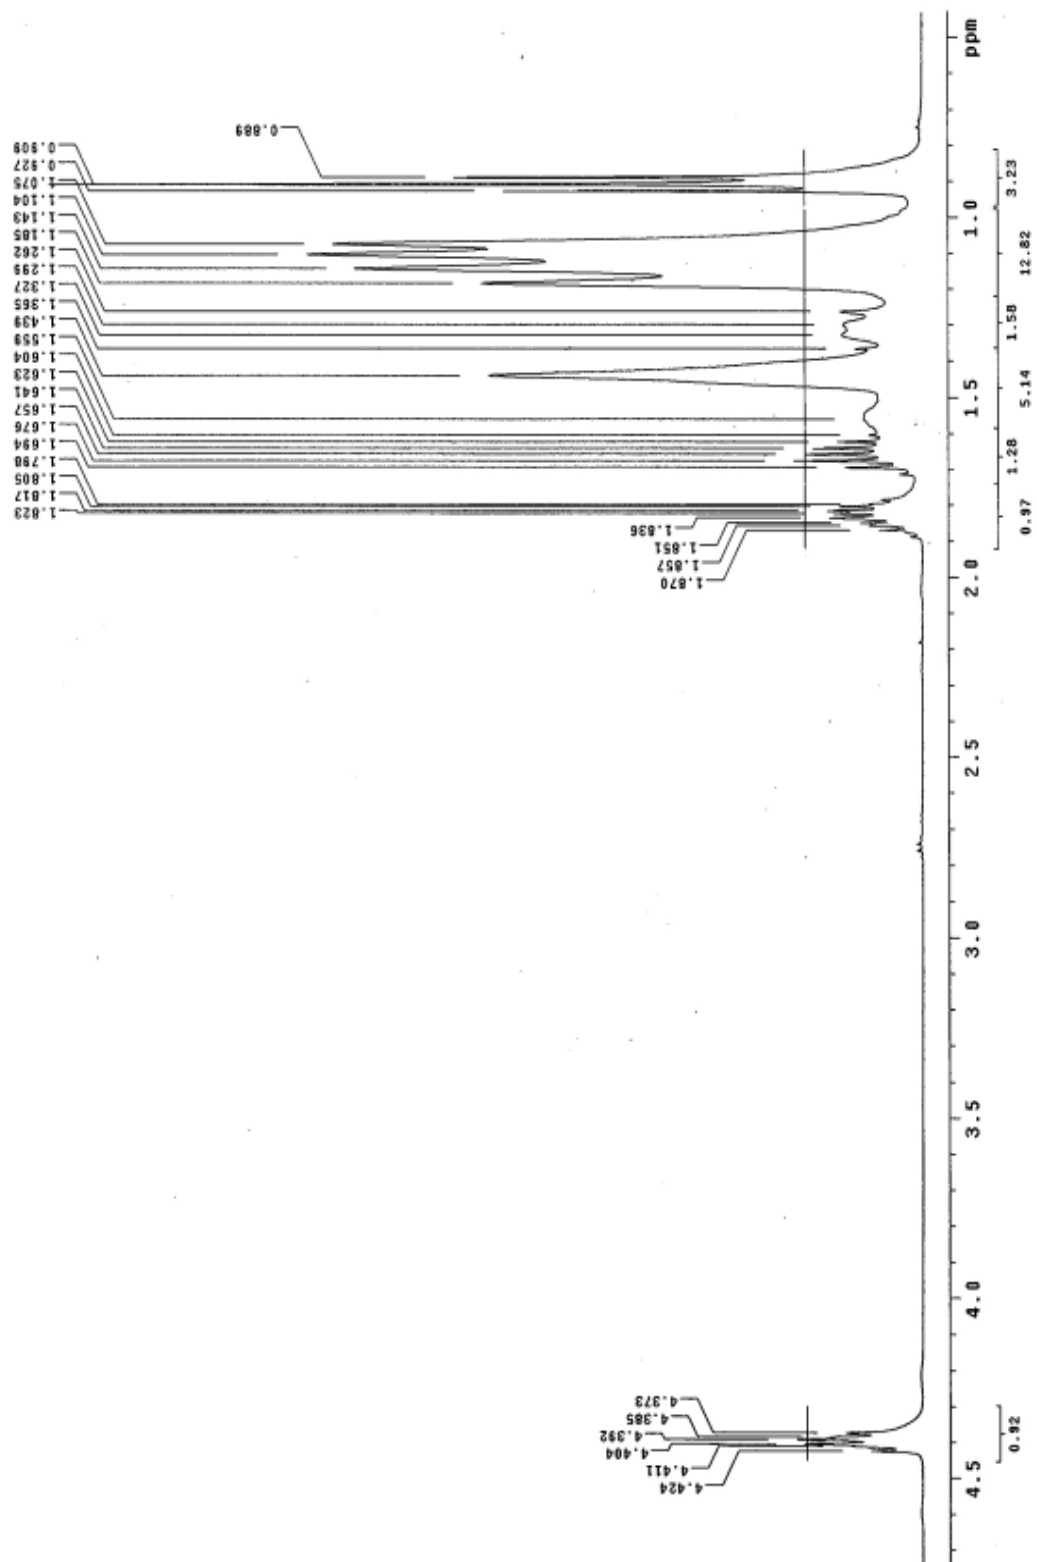

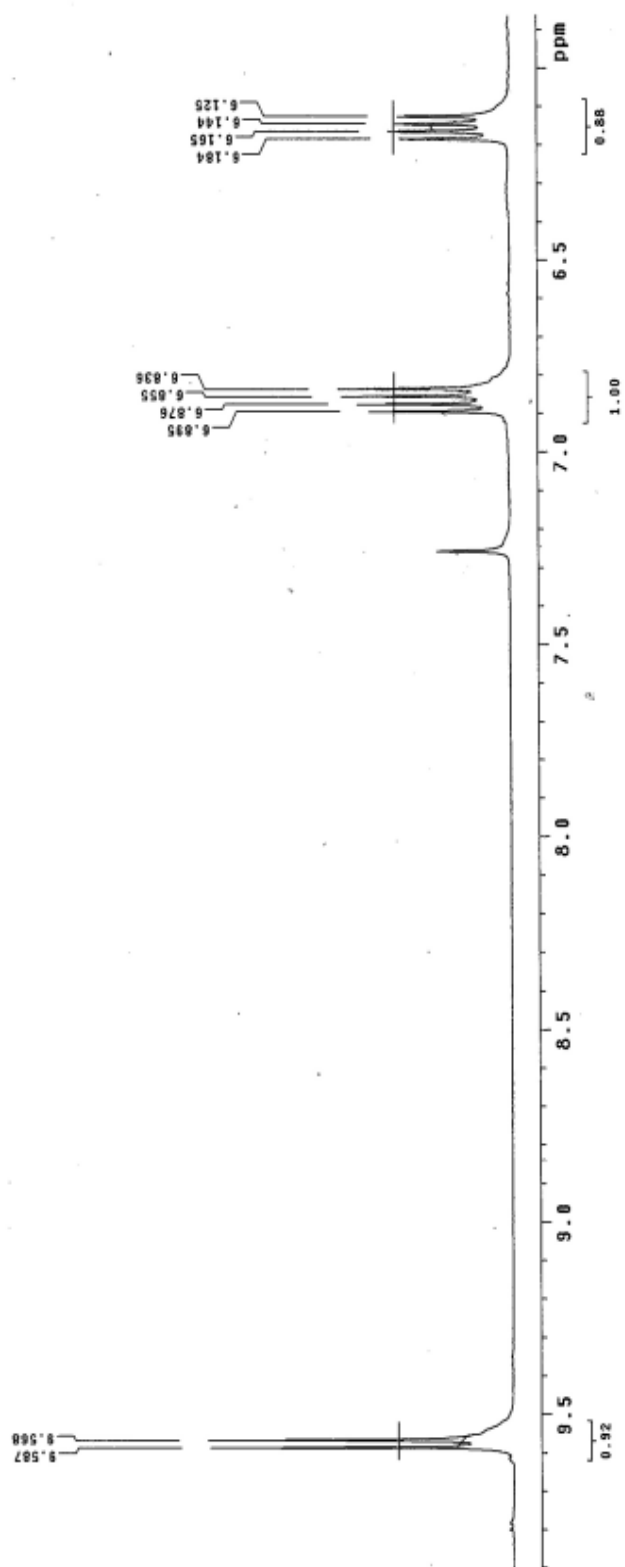

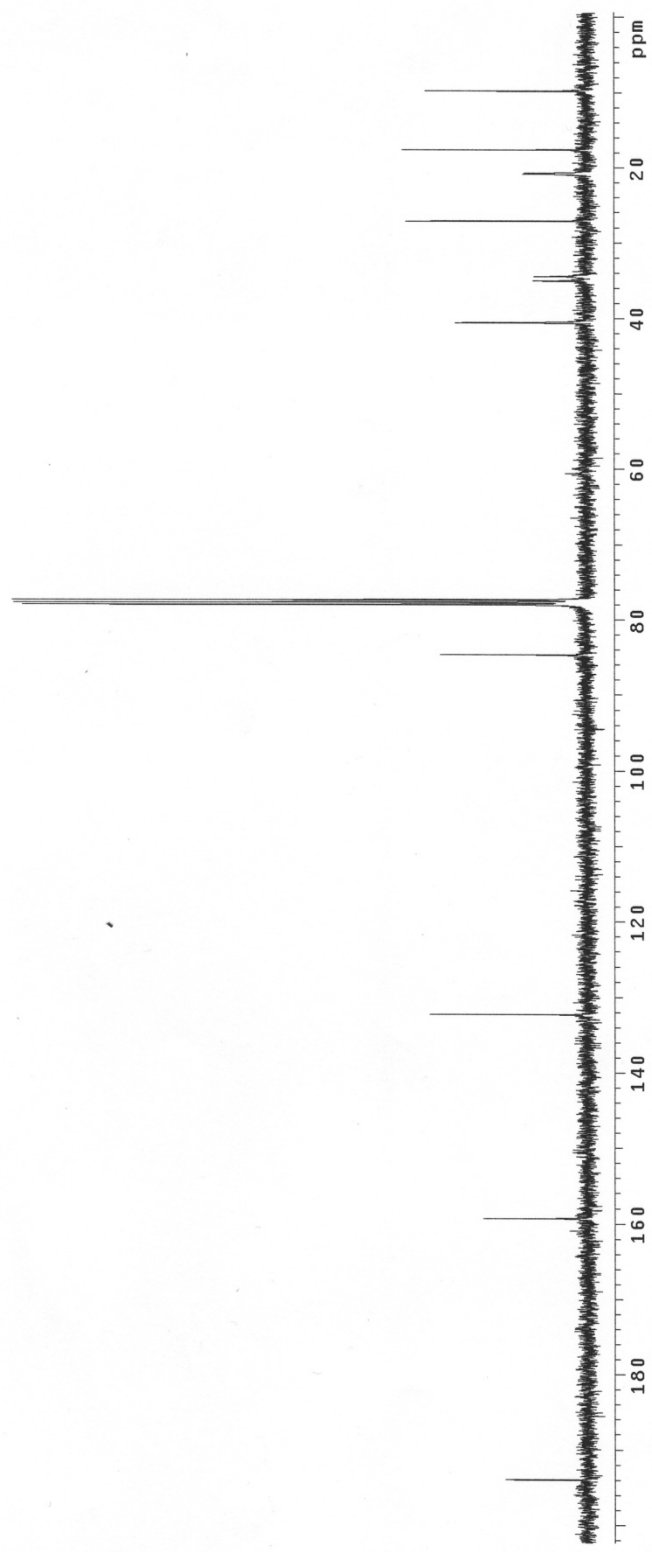

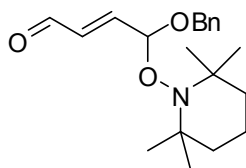

**(E)-4-(benzyloxy)-4-(2,2,6,6-tetramethylpiperidin-1-yloxy)but-2-enal (3b)**  $R_f = 0.73$  in 1:4 v/v ethyl acetate/hexane; white solid; yield 25.7 mg (0.0776 mmol, 31%); mp 68-70°C. IR (KBr): 2932, 1696, 1378, 1095, 698  $\text{cm}^{-1}$ .  $^1\text{H}$  NMR ( $\text{CDCl}_3$ , 400MHz)  $\delta$ : 1.11-1.55 (18H, m), 4.66 (1H, d,  $J = 11.6$  Hz), 4.78 (1H, d,  $J = 11.6$  Hz), 5.52 (1H, d,  $J = 4.8$  Hz), 6.27 (1H, dd,  $J = 8, 16$  Hz), 6.67 (1H, dd,  $J = 5.2, 15.6$  Hz), 7.30 (m, 5H), 9.59 (1H, d,  $J = 8$  Hz) ppm.  $^{13}\text{C}$  NMR ( $\text{CDCl}_3$ , 100MHz)  $\delta$ : 17.5, 20.6, 21.0, 33.9, 34.0, 40.4, 40.8, 60.1, 61.2, 70.2, 105.3, 127.8, 127.9, 128.6, 133.1, 137.9, 150.8, 193.6 ppm. HRMS  $m/z$  (FAB,  $[\text{M}+\text{H}]^+$ ): calcd for  $\text{C}_{20}\text{H}_{29}\text{NO}_3$ : 332.2226; found: 332.2224

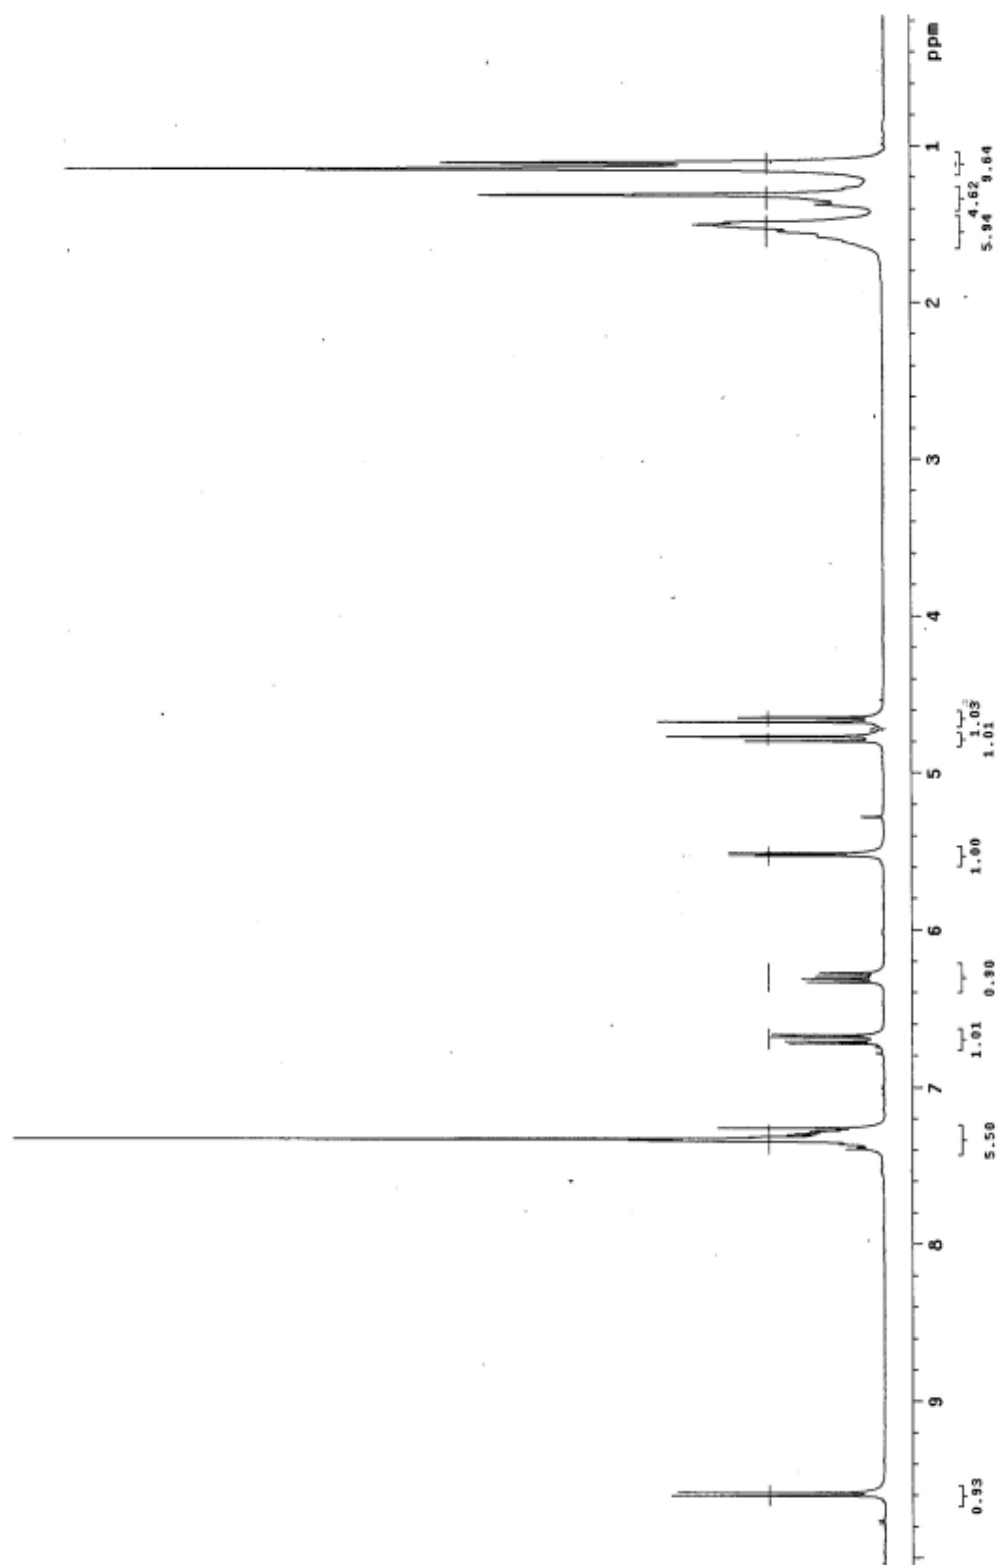

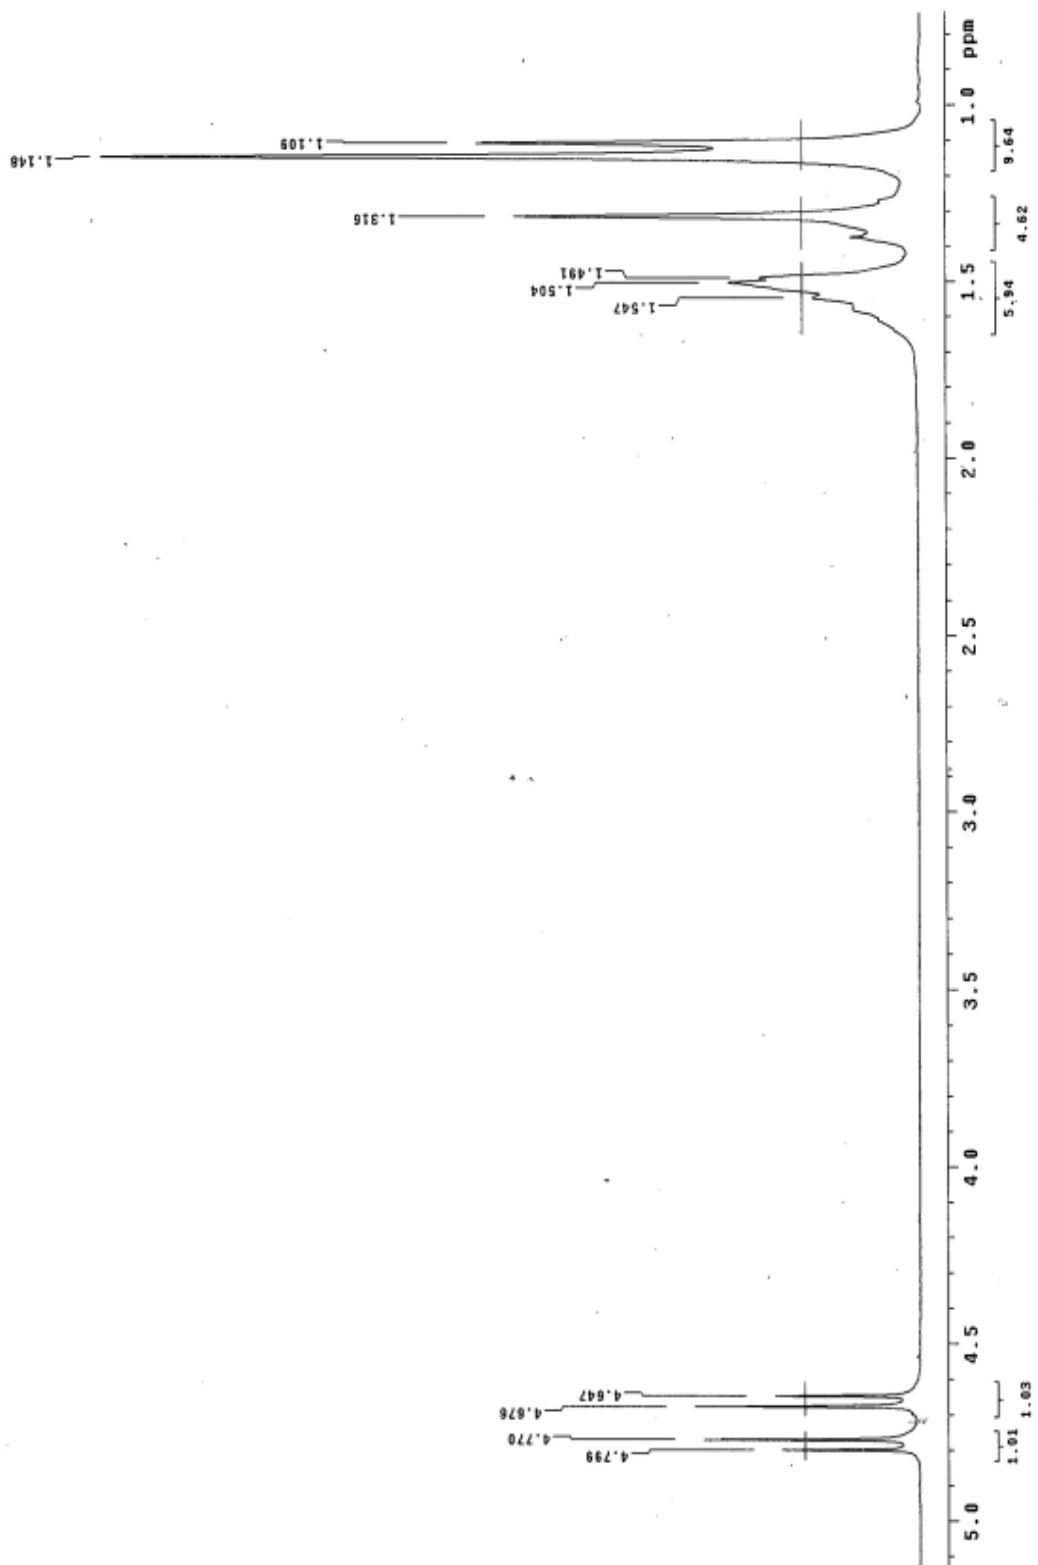

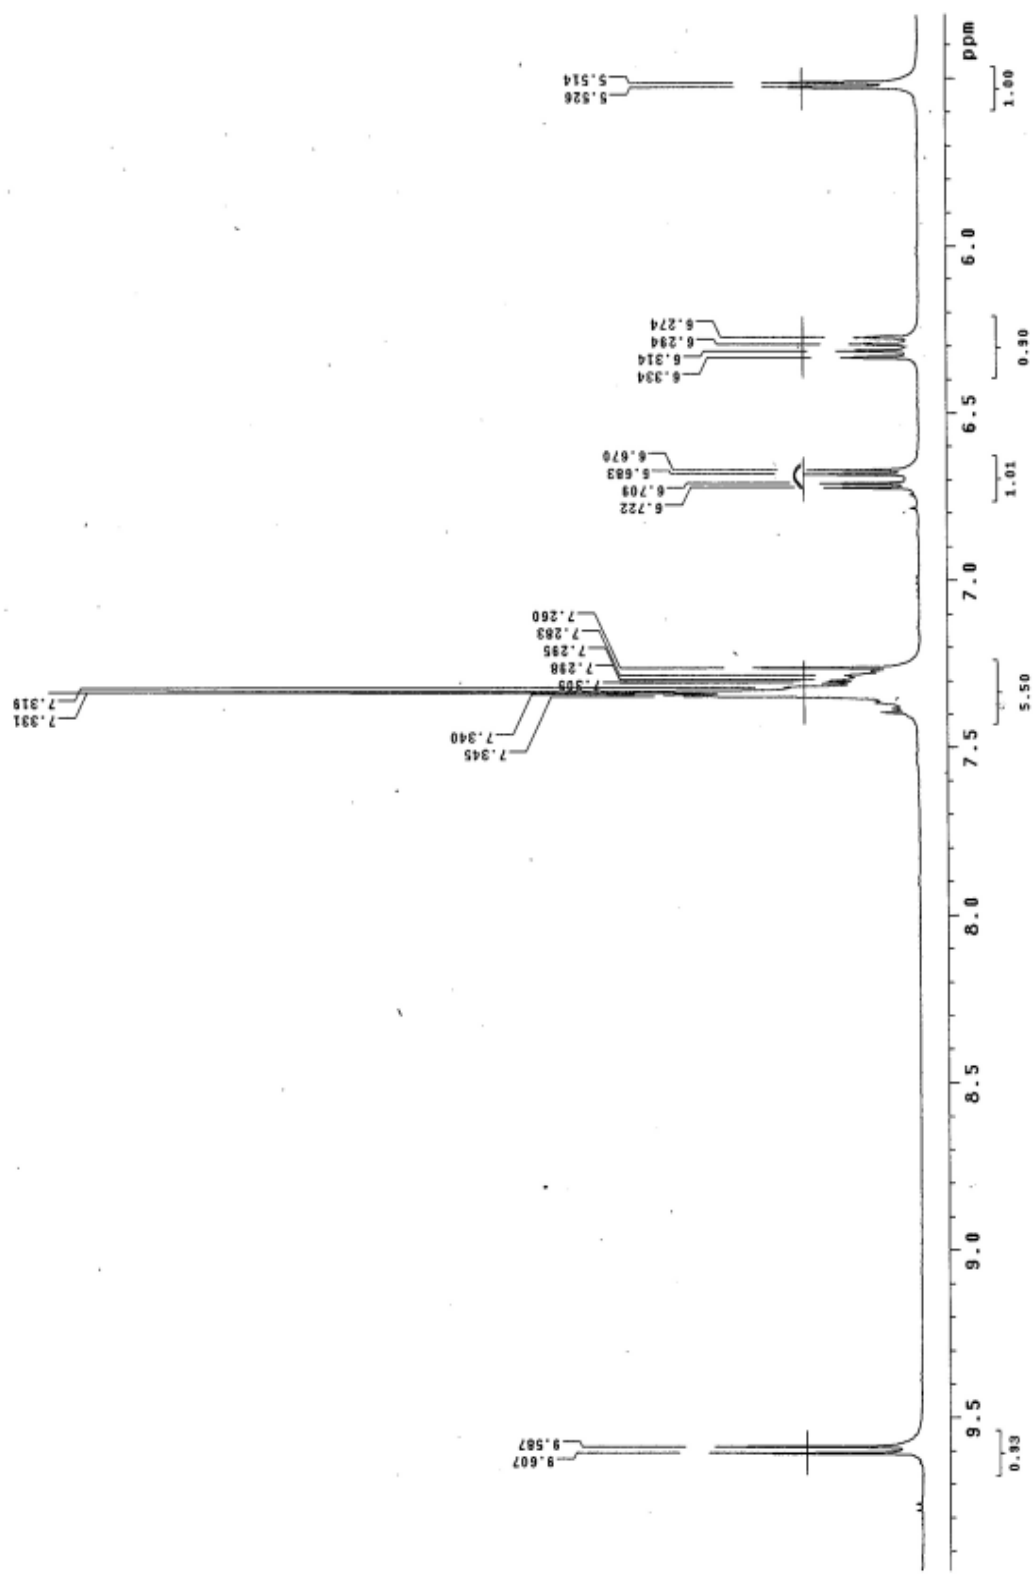



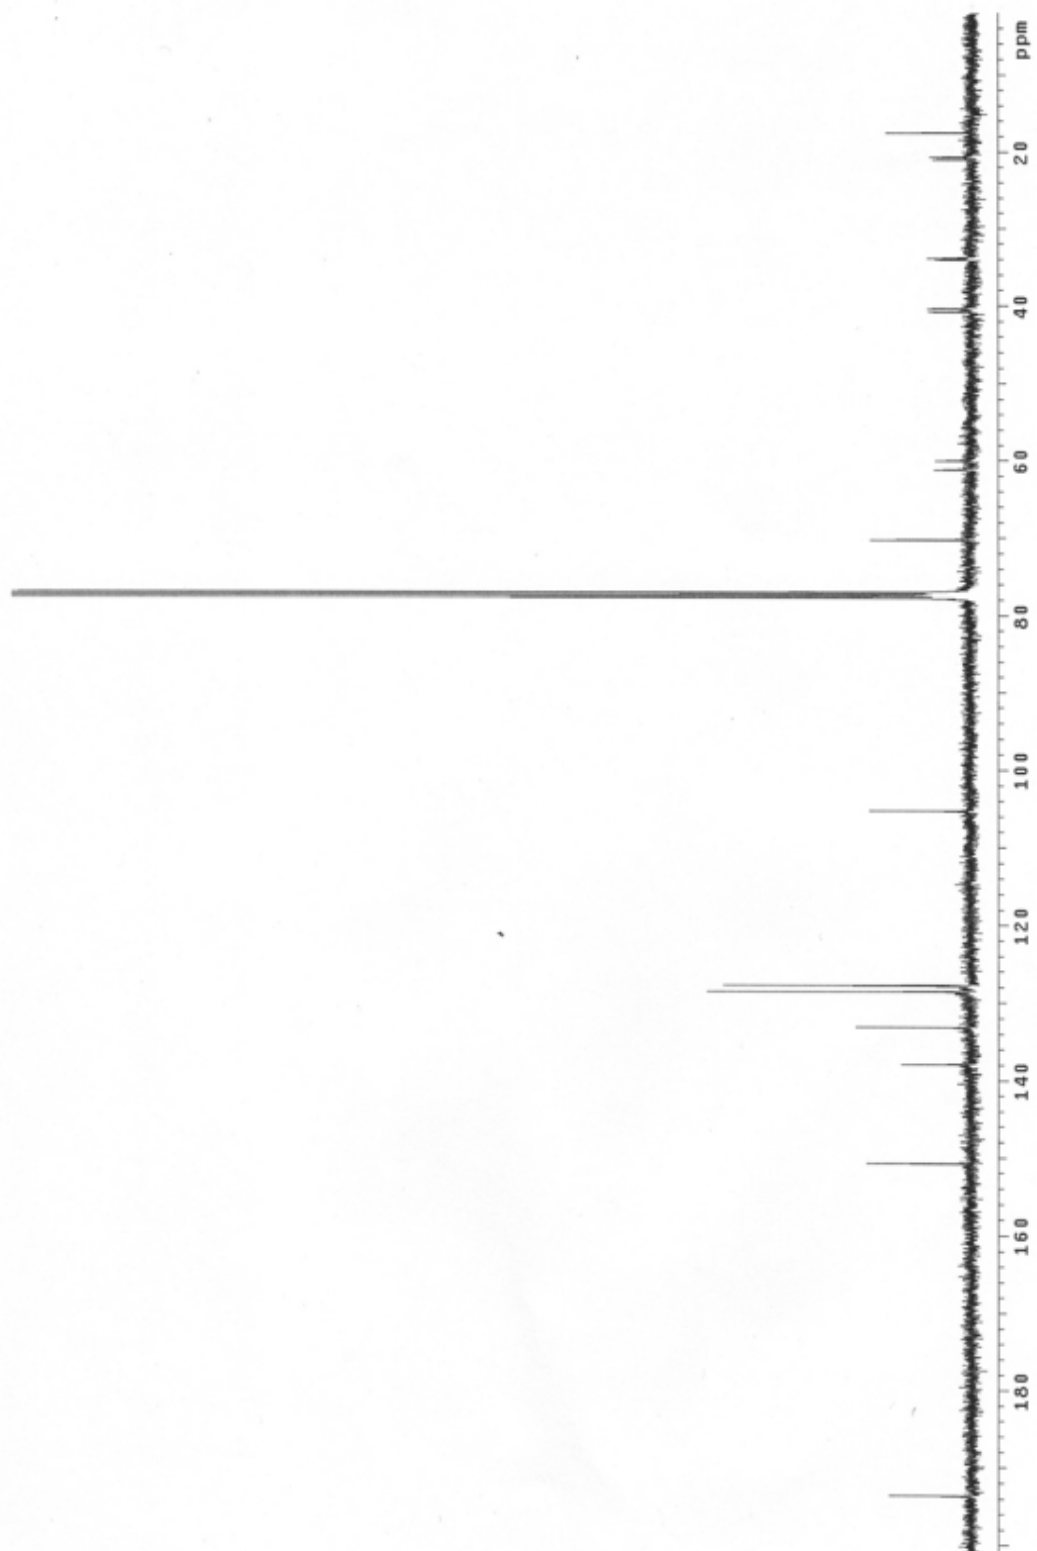

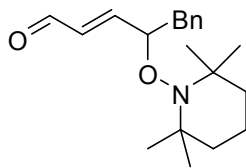

**(E)-5-phenyl-4-(2,2,6,6-tetramethylpiperidin-1-yloxy)pent-2-enal (4b)**  $R_f = 0.37$  in 1:5 v/v ether/hexane; colorless oil; yield 35.5 mg (0.1126 mmol, 45%). IR (KBr): 2972, 1725, 1385, 1132, 700  $\text{cm}^{-1}$ .  $^1\text{H}$  NMR ( $\text{CDCl}_3$ , 400MHz)  $\delta$ : 1.07-1.55 (18H, m), 2.80 (1H, dd,  $J = 8.4, 13.2$  Hz), 3.26 (1H, dd,  $J = 5.6, 13.2$  Hz), 4.67 (1H, m), 6.00 (1H, dd,  $J = 6.8, 15.8$  Hz), 6.77 (1H, dd,  $J = 7.2, 15.8$  Hz), 7.22 (5H, m), 9.47 (1H, d,  $J = 7.6$  Hz) ppm.  $^{13}\text{C}$  NMR ( $\text{CDCl}_3$ , 100MHz)  $\delta$ : 17.6, 20.8, 21.0, 34.5, 35.2, 40.6, 41.2, 84.1, 126.7, 128.5, 129.8, 132.3, 137.2, 158.1, 193.7 ppm. HRMS  $m/z$  (FAB,  $[\text{M}+\text{H}]^+$ ): calcd for  $\text{C}_{20}\text{H}_{29}\text{NO}_2$ : 316.2277; found: 326.2279

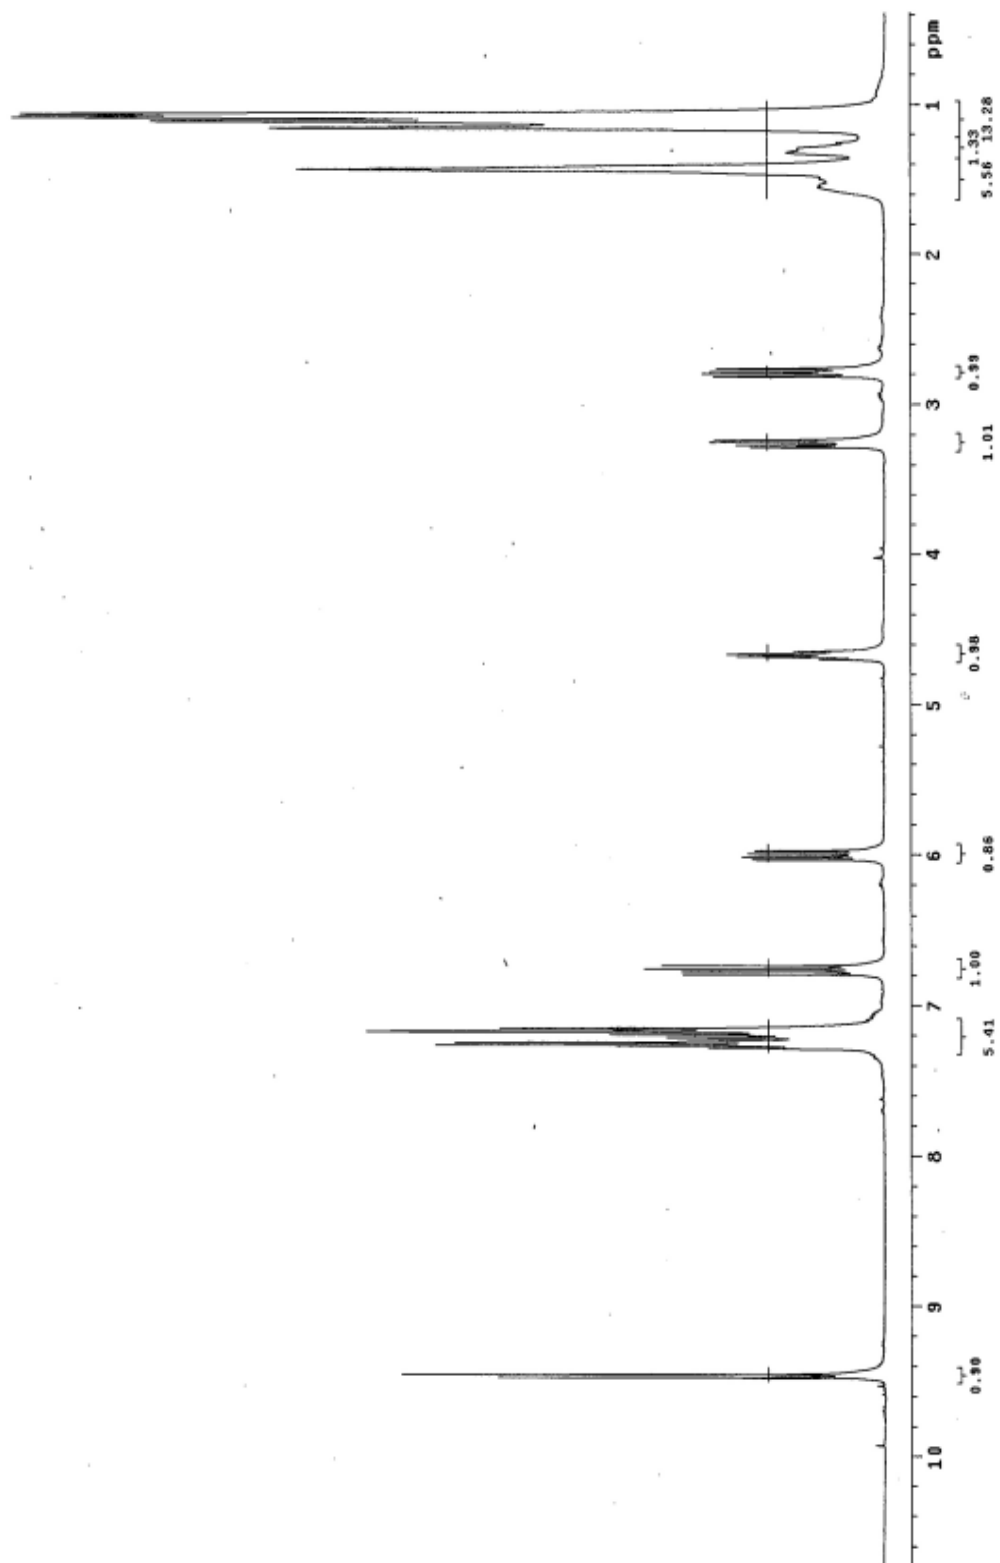

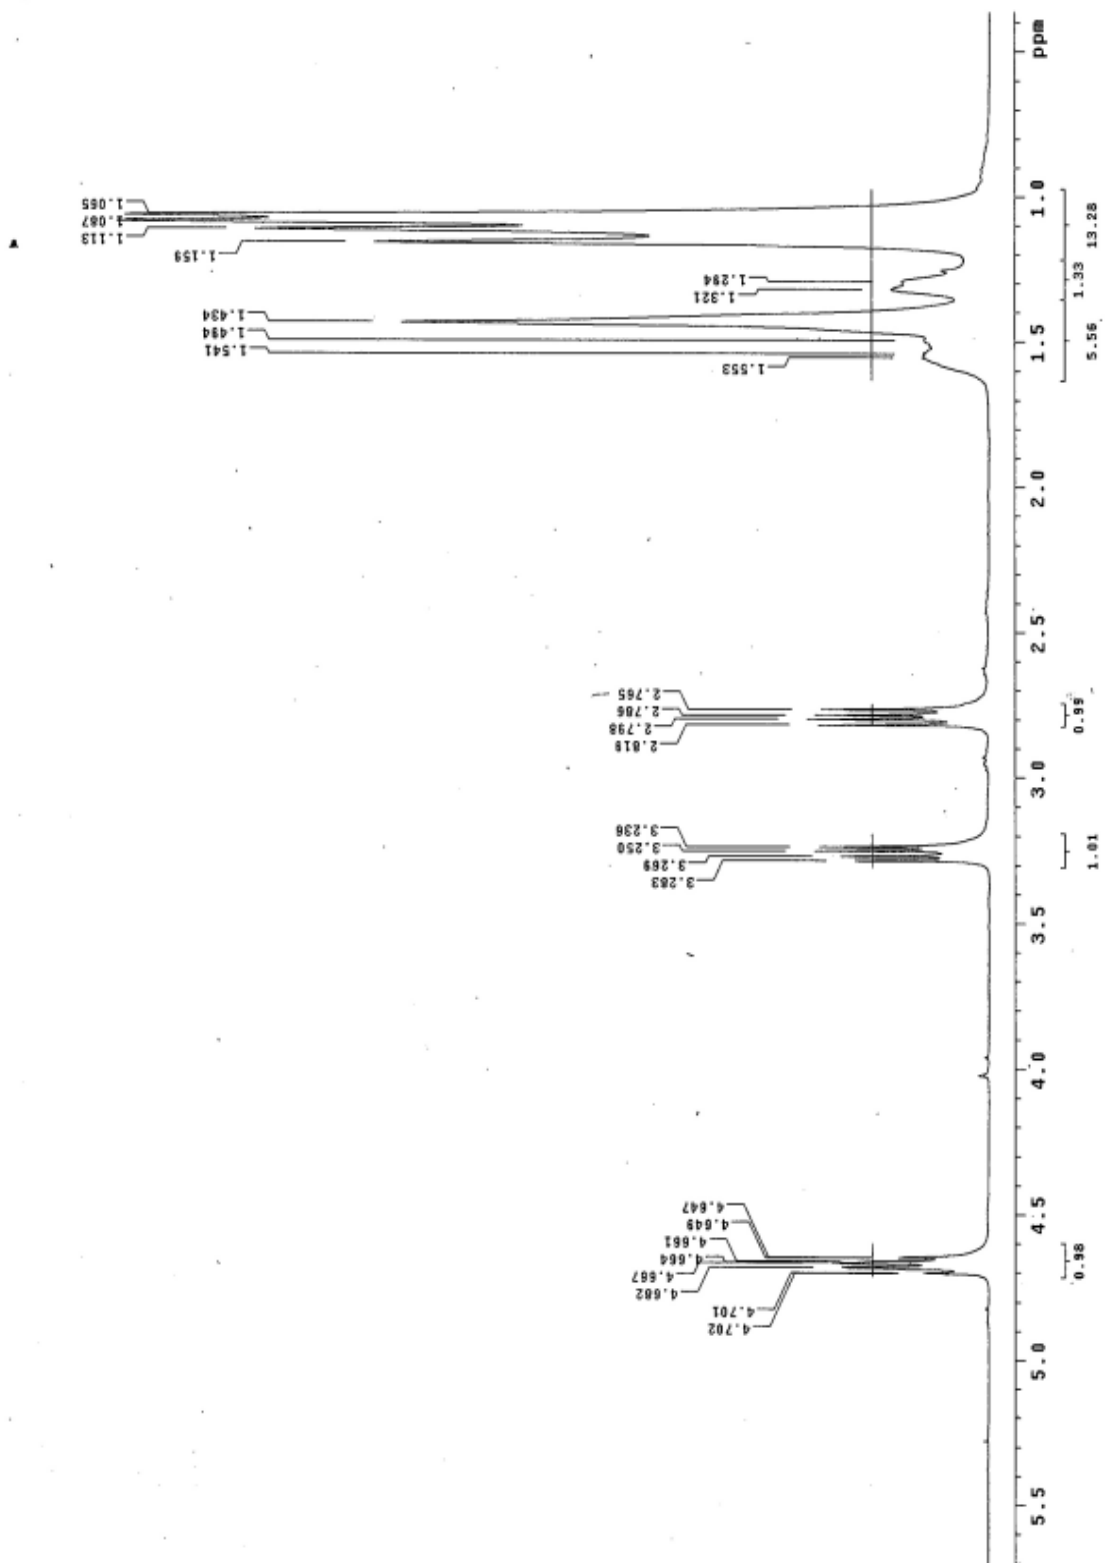

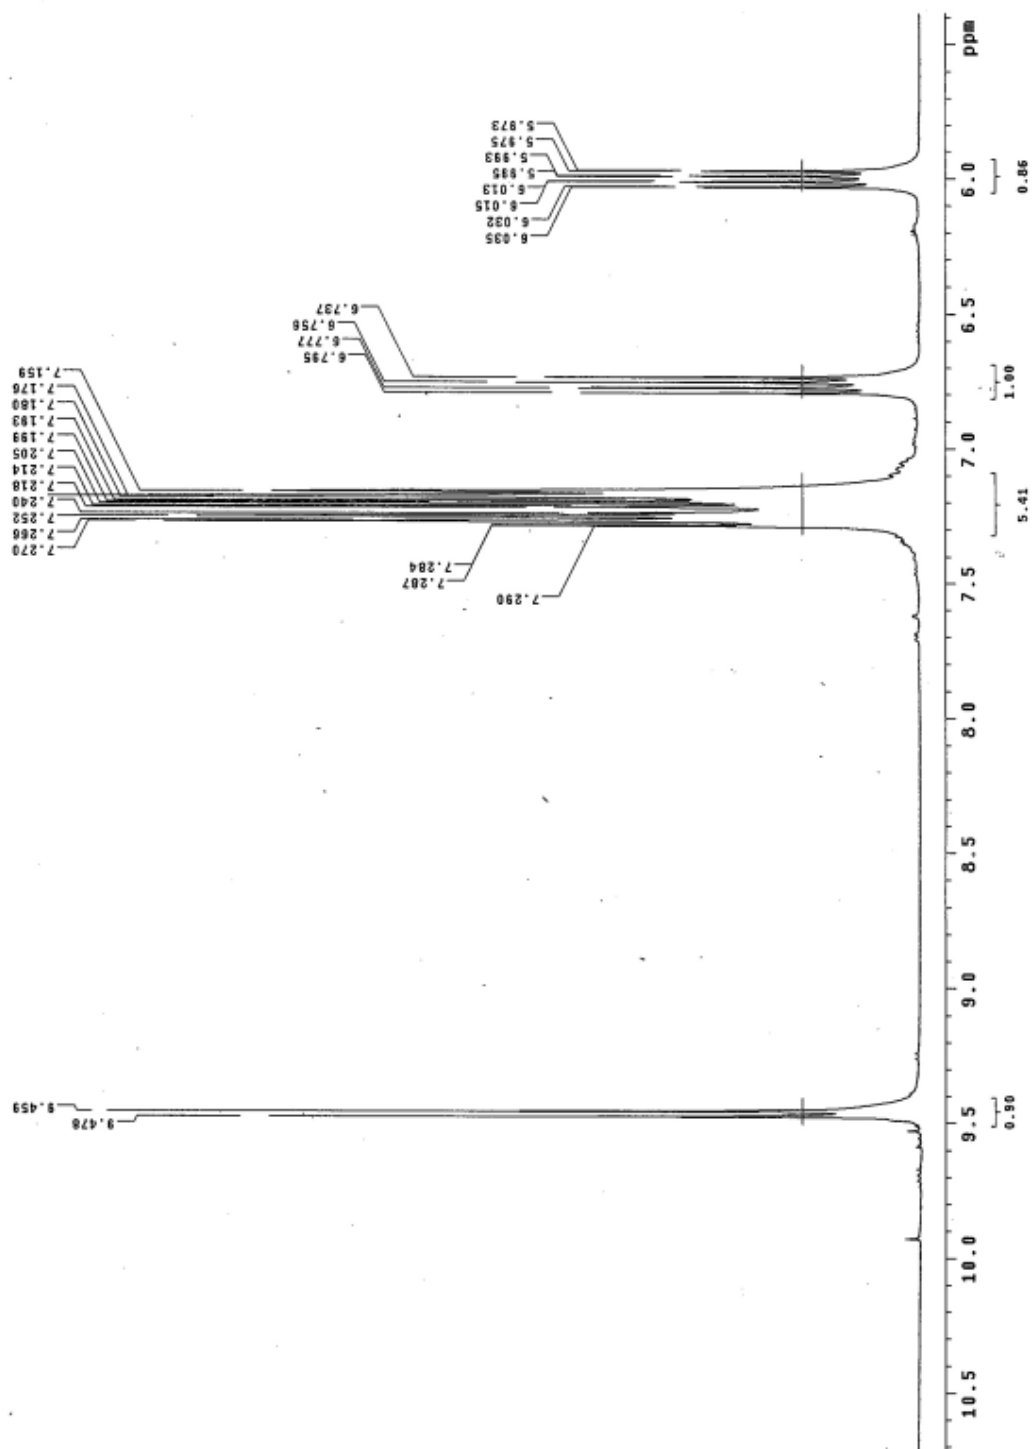

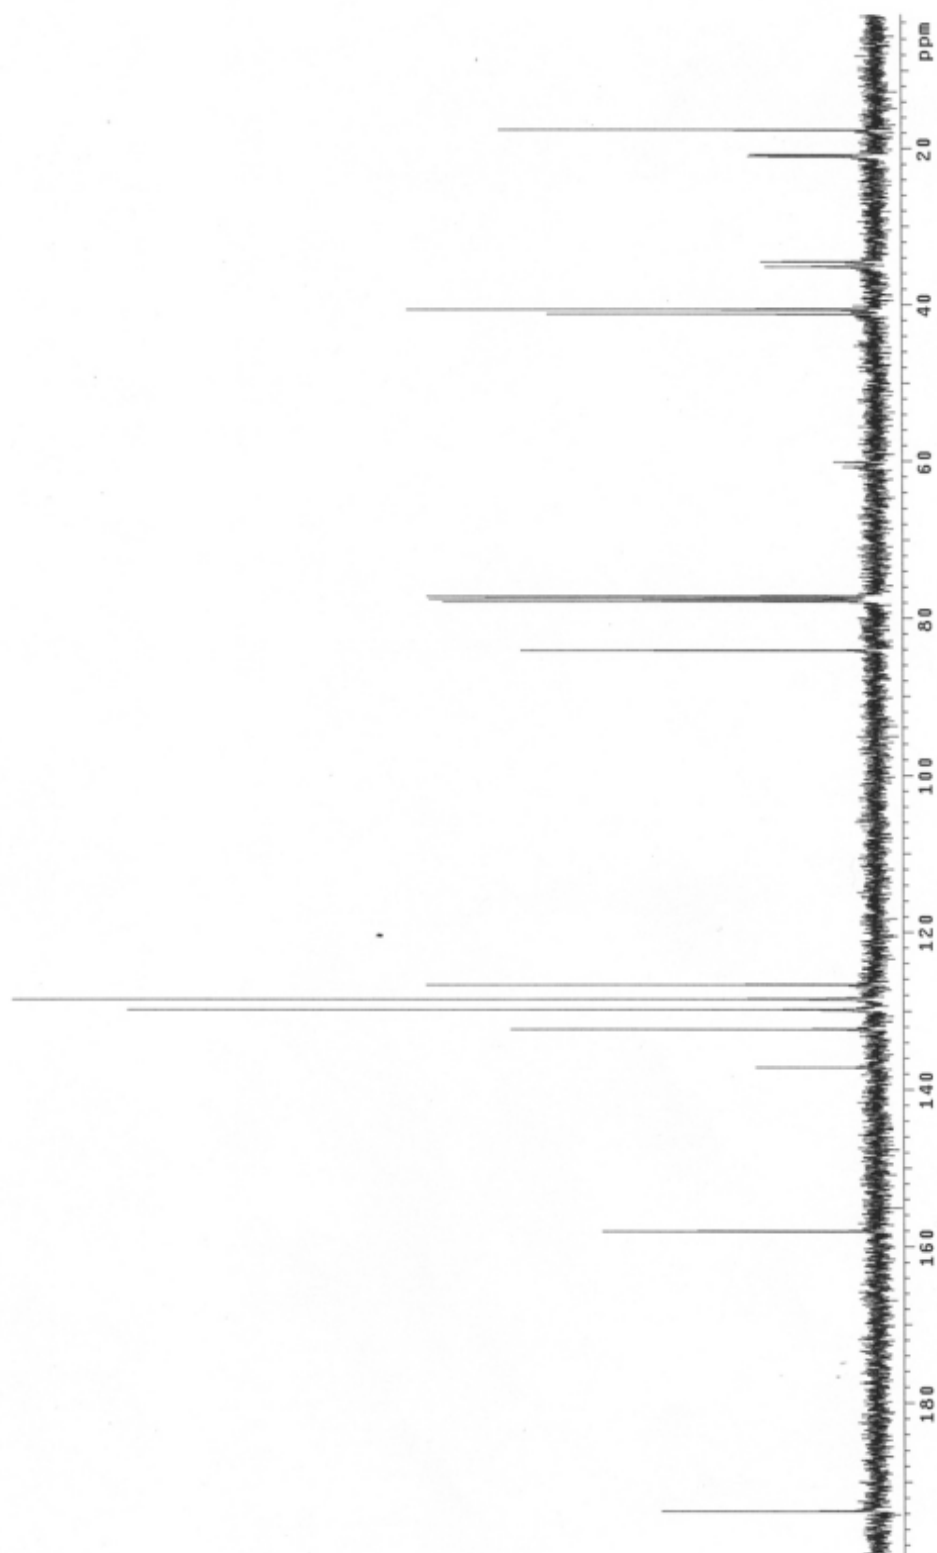

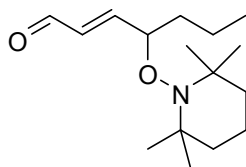

**(E)-4-(2,2,6,6-tetramethylpiperidin-1-yloxy)hept-2-enal (5b)**  $R_f$  = 0.70 in 1:4 v/v ether/hexane; colorless oil; yield 34.1 mg (0.1276 mmol, 45%). IR (KBr): 2962, 1696, 1375, 1133, 985  $\text{cm}^{-1}$ .  $^1\text{H}$  NMR ( $\text{CDCl}_3$ , 400MHz)  $\delta$ : 0.89-1.79 (25H, m), 4.44 (1H, m), 6.13 (1H, dd,  $J$  = 7.6, 15.6 Hz), 6.88 (1H, dd,  $J$  = 7.6, 15.6 Hz), 9.57 (1H, d,  $J$  = 8 Hz) ppm.  $^{13}\text{C}$  NMR ( $\text{CDCl}_3$ , 100MHz)  $\delta$ : 14.6, 17.6, 18.7, 20.7, 34.4, 35.1, 36.4, 40.5, 83.4, 132.1, 159.6, 194.0 ppm. HRMS  $m/z$  (FAB,  $[\text{M}+\text{H}]^+$ ): calcd for  $\text{C}_{16}\text{H}_{29}\text{NO}_2$ : 268.2277; found: 268.2273

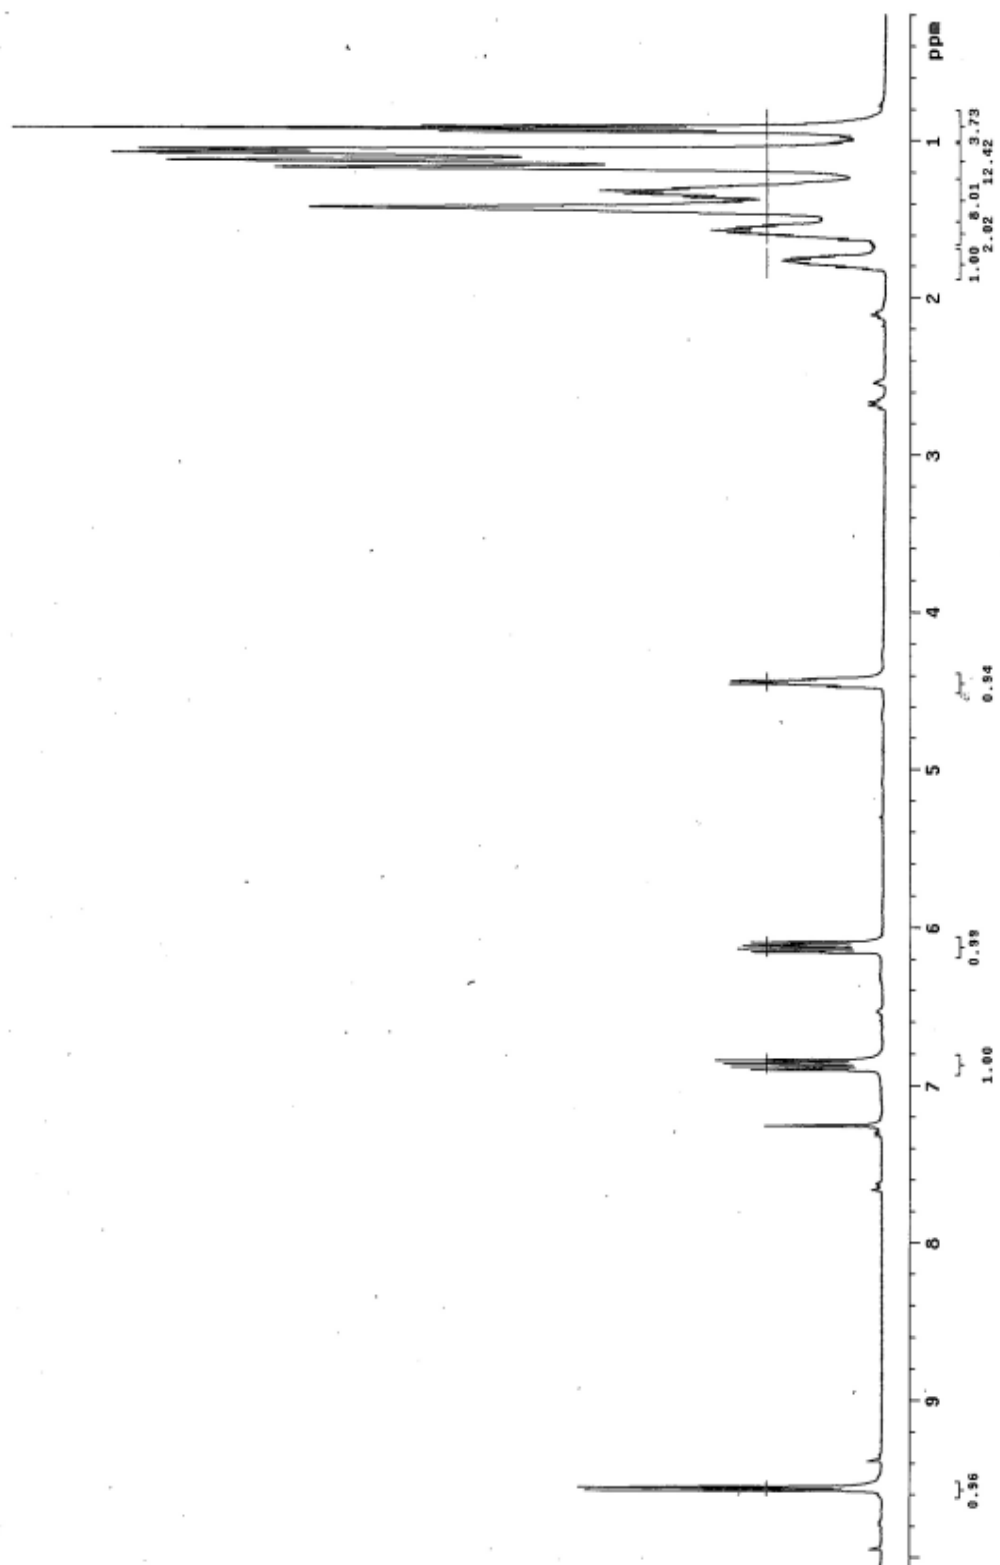



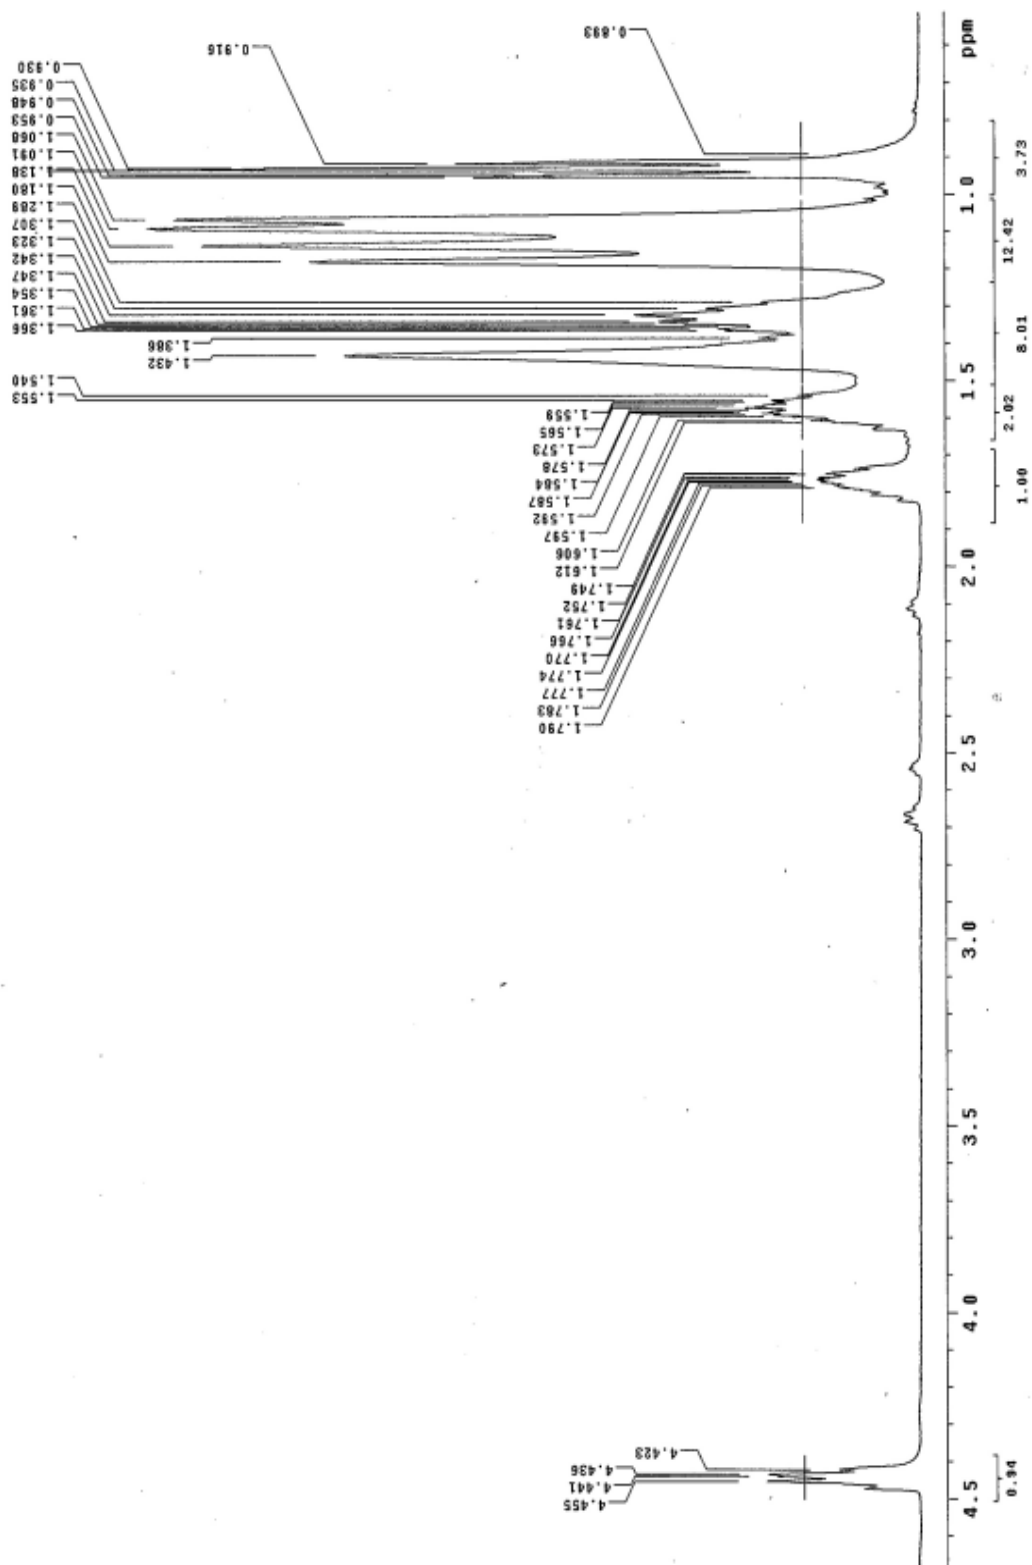

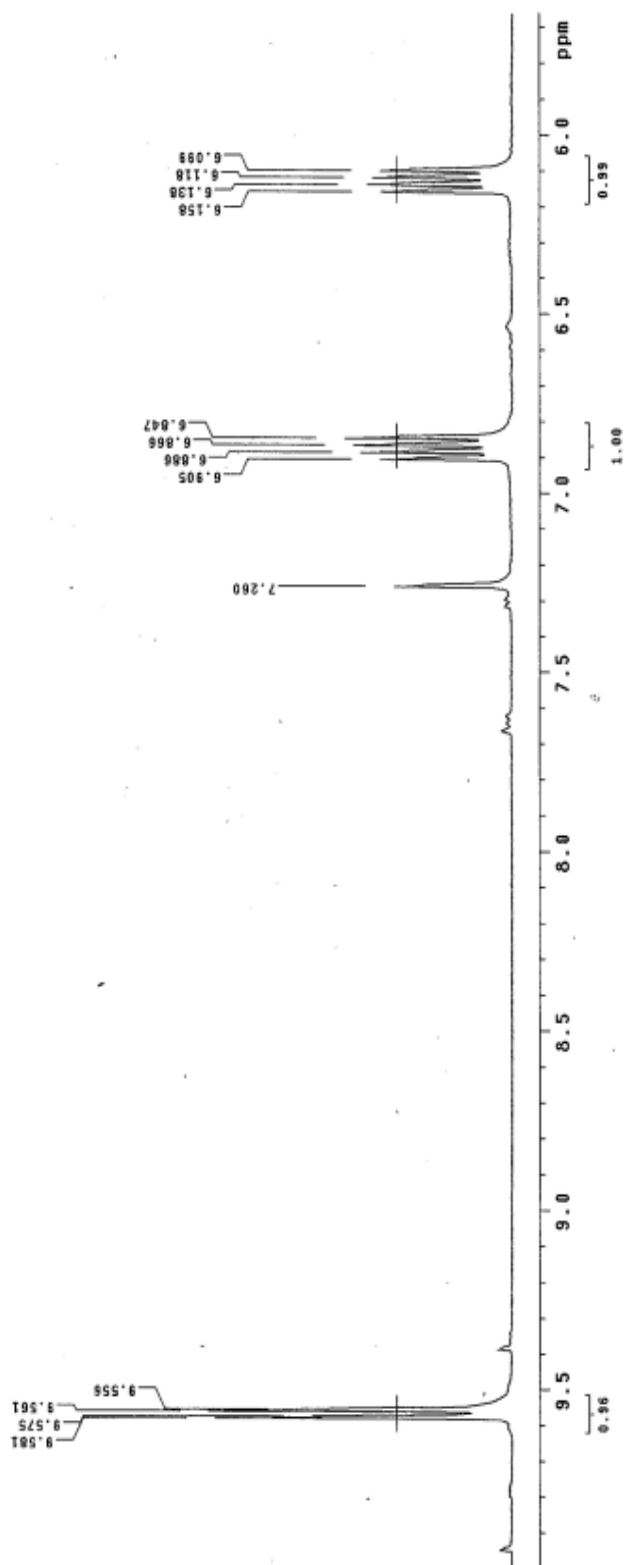

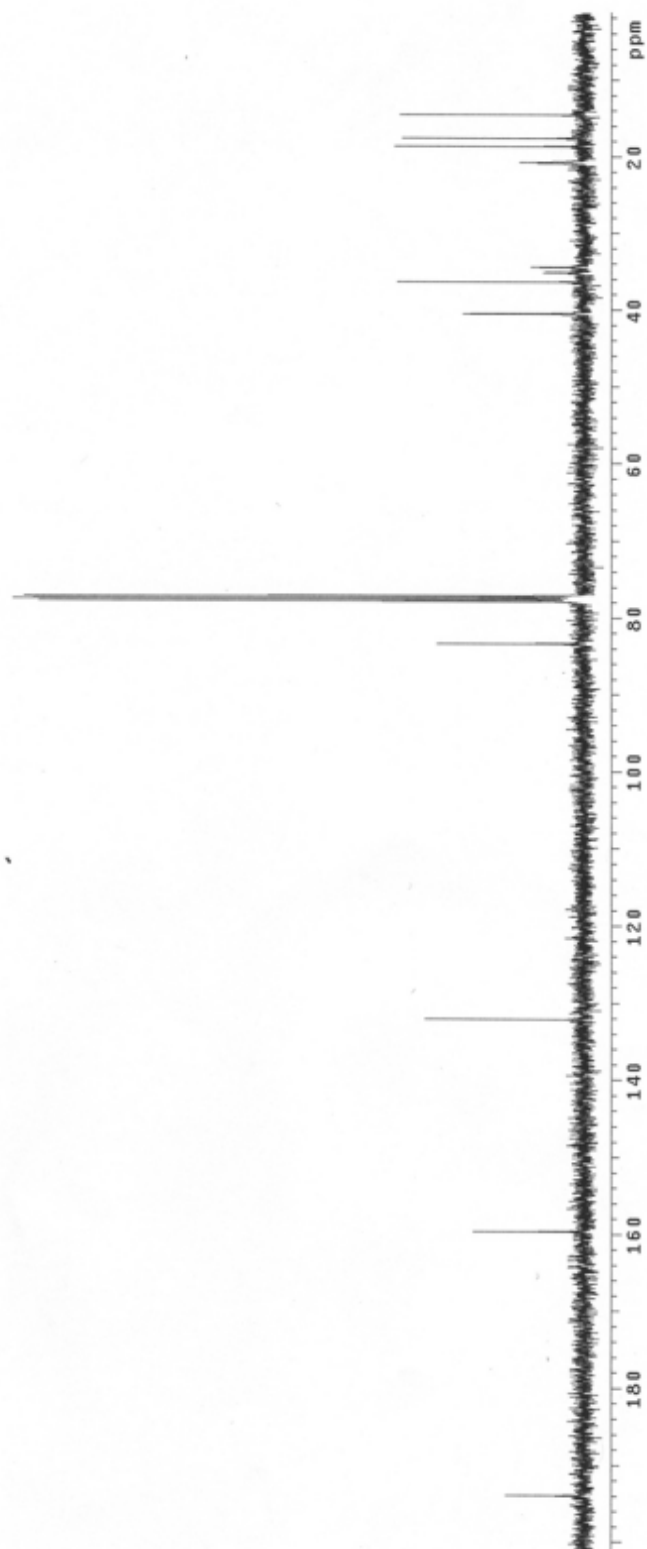

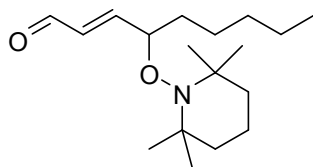

**(E)-4-(2,2,6,6-tetramethylpiperidin-1-yloxy)non-2-enal (6b)**  $R_f = 0.63$  in 1:4 v/v ether/hexane; colorless oil; yield 39.9 mg (0.135 mmol, 54%). IR (KBr): 2931, 1696, 1375, 1132, 976  $\text{cm}^{-1}$ .  $^1\text{H}$  NMR ( $\text{CDCl}_3$ , 400MHz)  $\delta$ : 0.87-1.81 (27H, m), 4.43 (1H, m), 6.13 (1H, dd,  $J = 8, 15.6$  Hz), 6.87 (1H, dd,  $J = 8, 15.6$  Hz), 9.57 (1H, d,  $J = 8$  Hz) ppm.  $^{13}\text{C}$  NMR ( $\text{CDCl}_3$ , 100MHz)  $\delta$ : 14.2, 17.4, 20.5, 20.6, 22.7, 24.8, 32.0, 34.0, 34.2, 34.9, 40.3, 83.3, 131.8, 159.5, 193.7 ppm. HRMS  $m/z$  (FAB,  $[\text{M}+\text{H}]^+$ ): calcd for  $\text{C}_{18}\text{H}_{33}\text{NO}_2$ : 296.2590; found: 296.2590

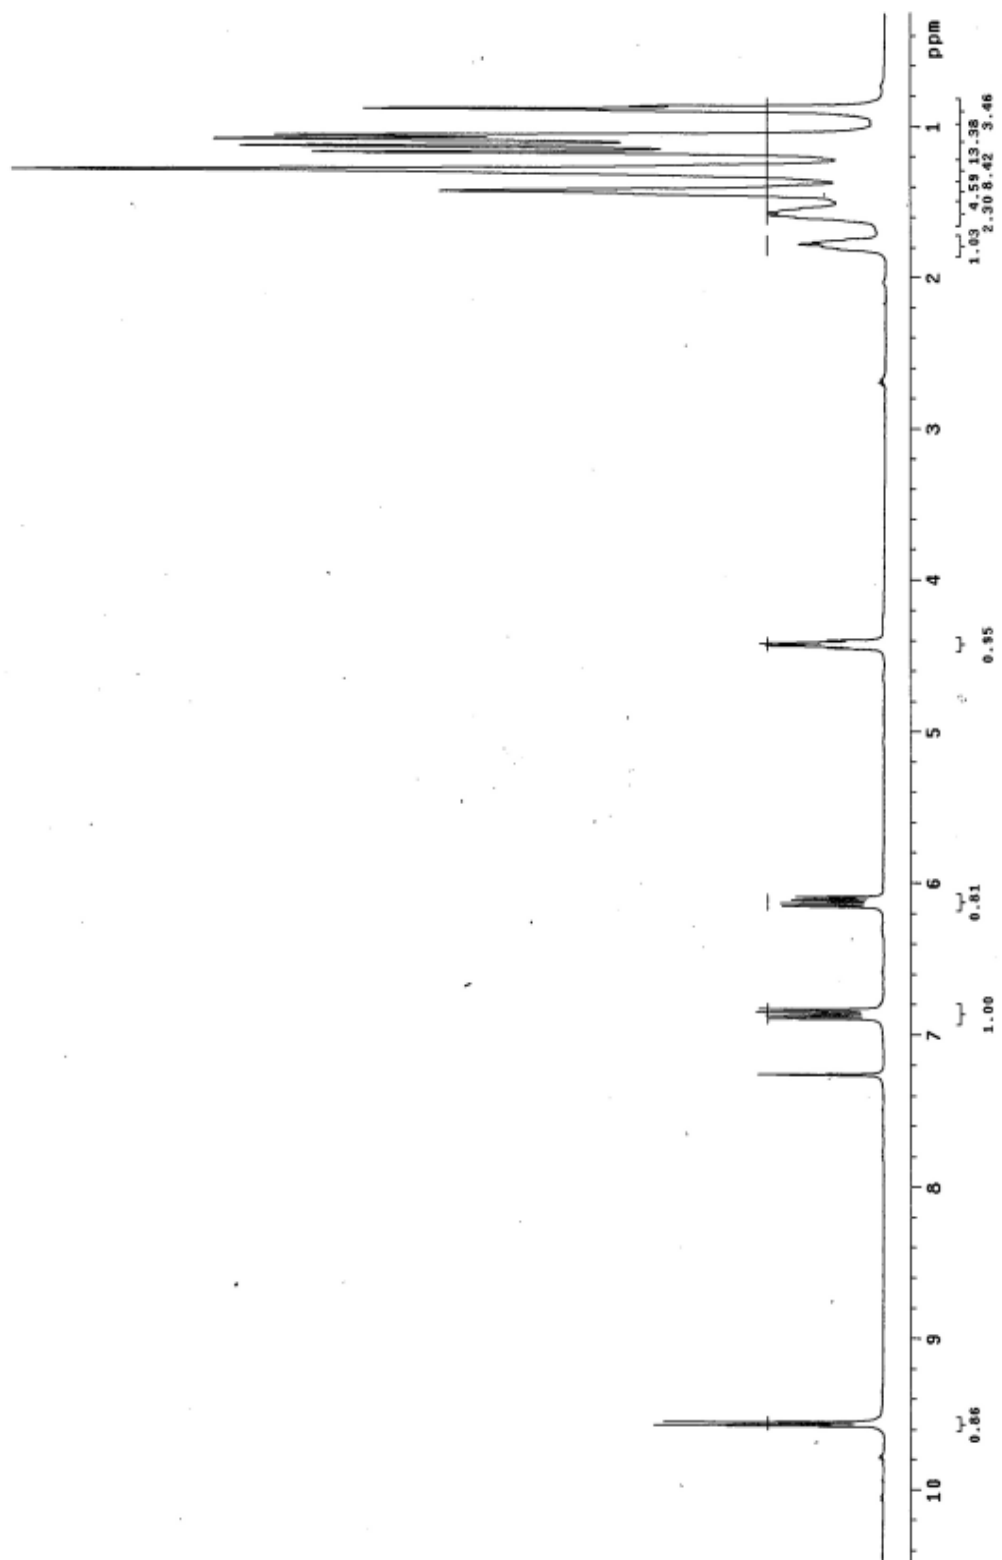

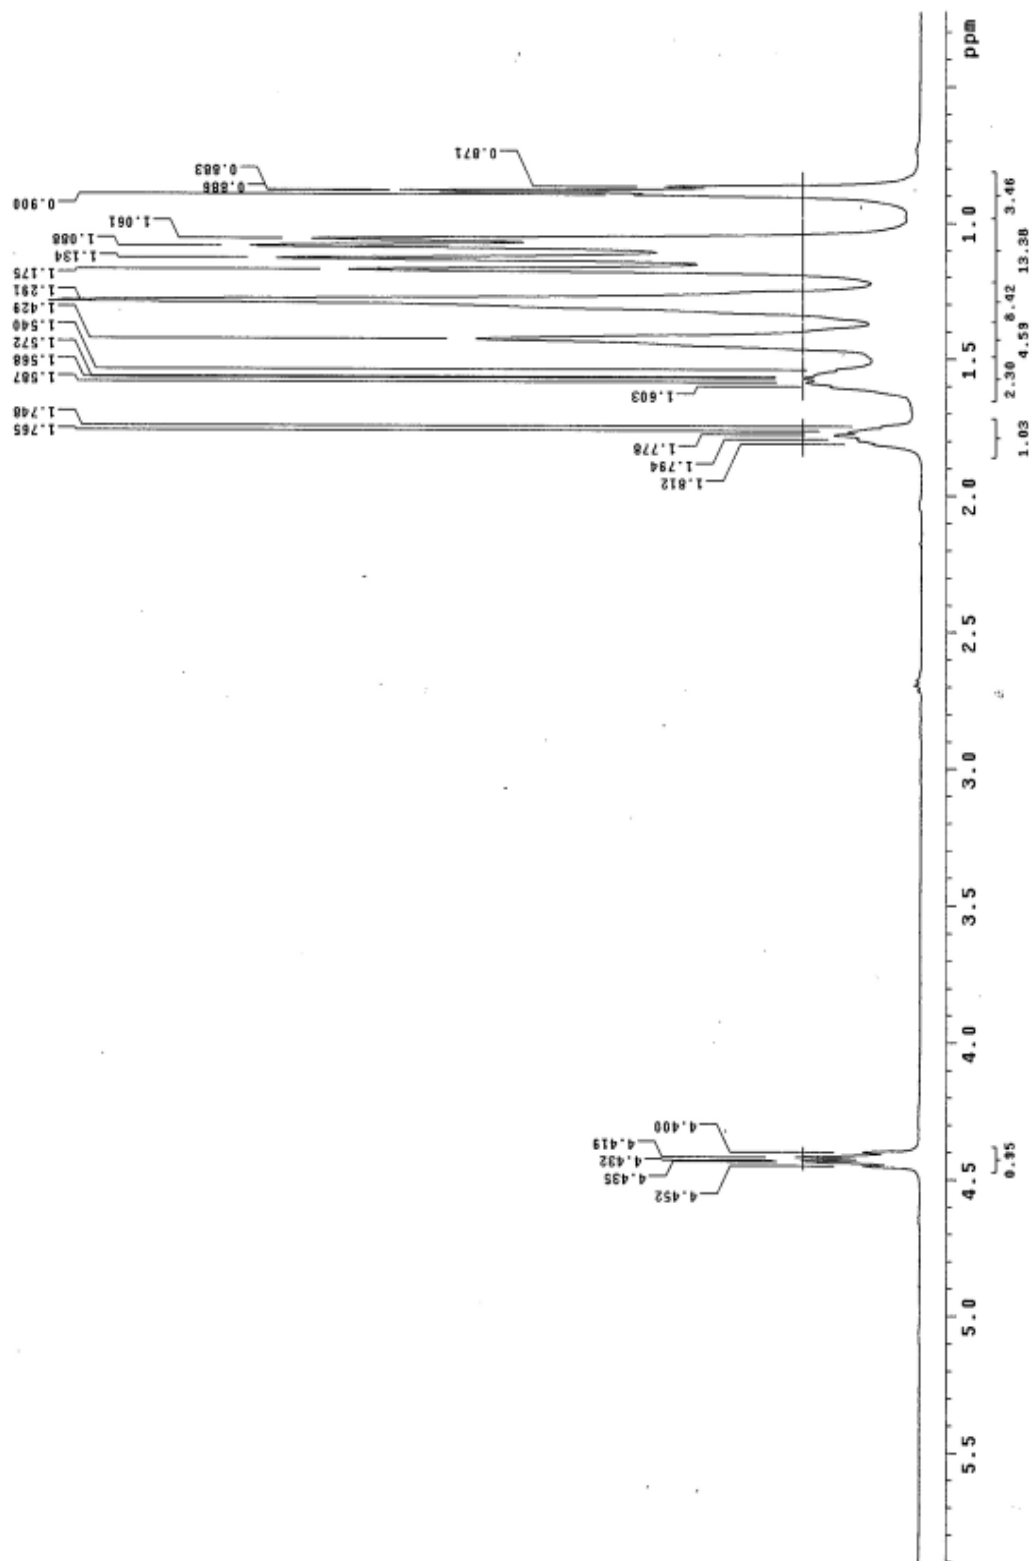

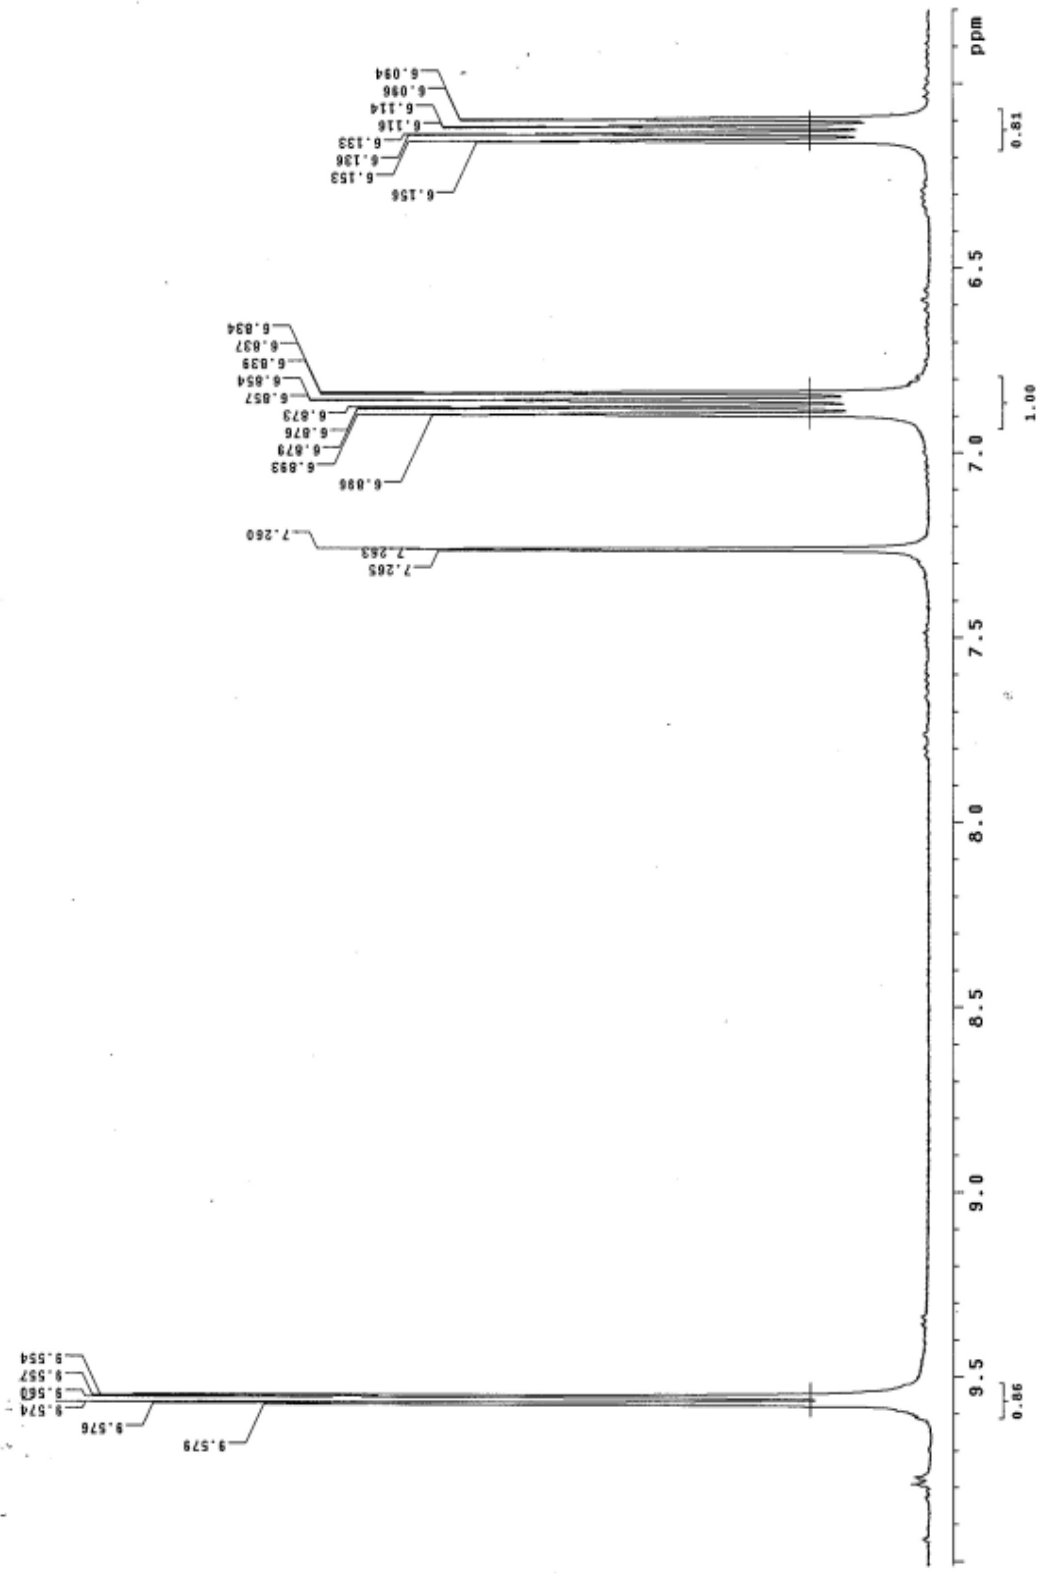

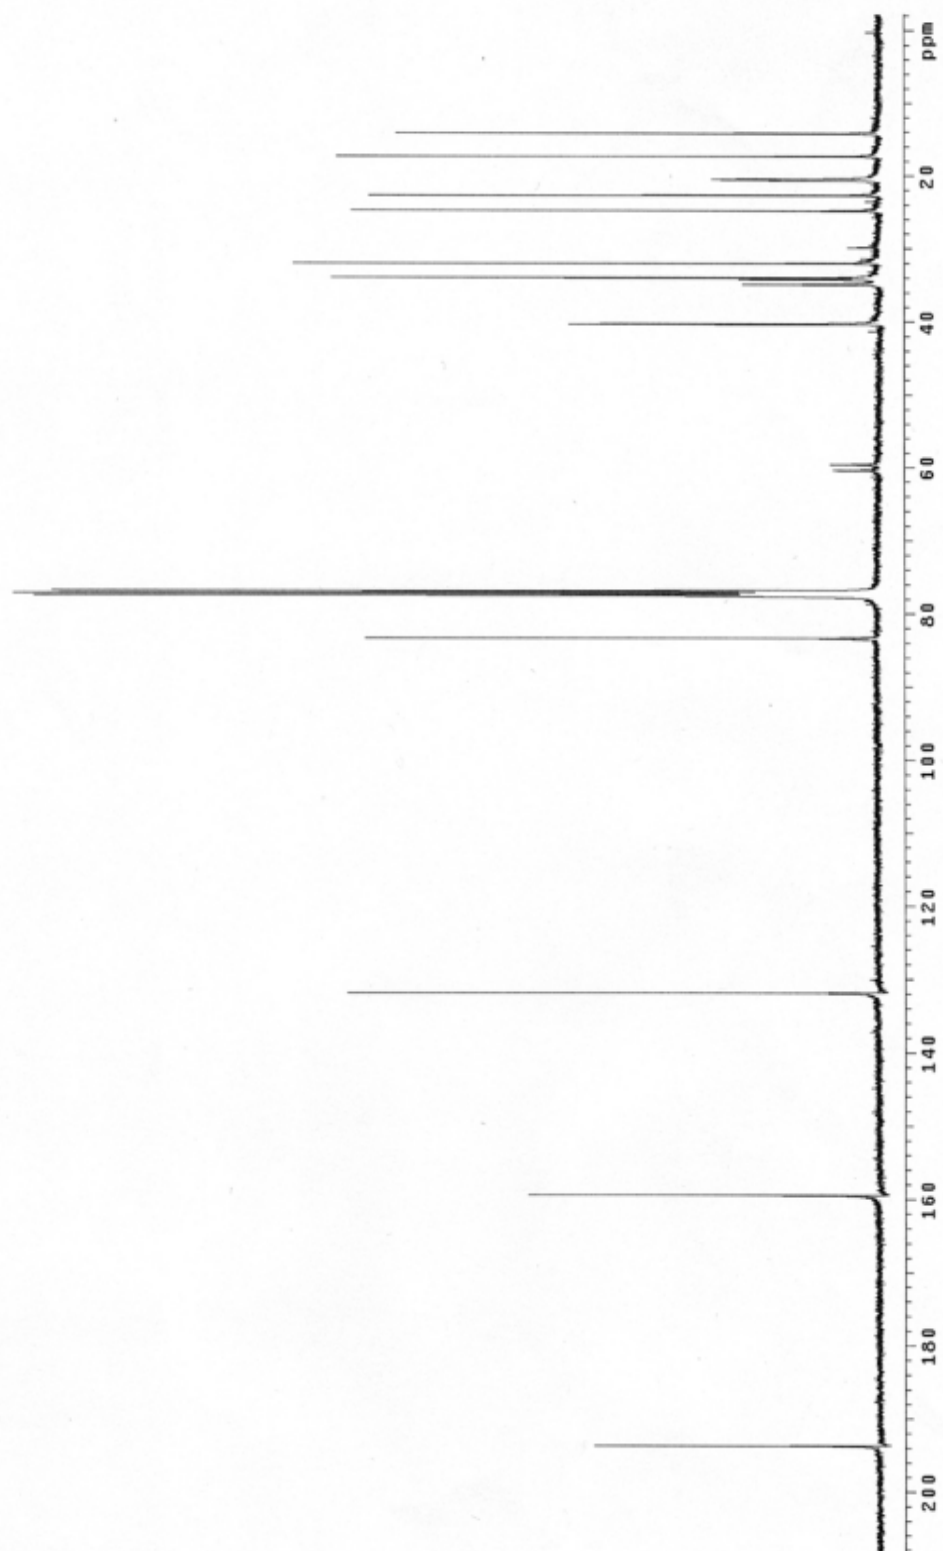



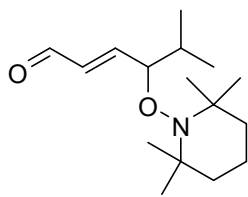

**(E)-5-methyl-4-(2,2,6,6-tetramethylpiperidin-1-yloxy)hex-2-enal (7b)**  $R_f = 0.63$  in 1:4 v/v ether/hexane; colorless oil; yield 30.7 mg (0.1149 mmol, 46%). IR (KBr): 2969, 1695, 1375, 1133, 986  $\text{cm}^{-1}$ .  $^1\text{H}$  NMR ( $\text{CDCl}_3$ , 400 MHz)  $\delta$ : 0.86-1.44 (24H, m), 2.13 (1H, m), 4.29 (1H, m), 6.15 (1H, dd,  $J = 8, 15.8$  Hz), 6.93 (1H, dd,  $J = 8.4, 16$  Hz), 9.60 (1H, d,  $J = 7.6$  Hz) ppm.  $^{13}\text{C}$  NMR ( $\text{CDCl}_3$ , 100 MHz)  $\delta$ : 17.6, 18.0, 19.4, 20.8, 32.4, 34.6, 35.0, 40.5, 40.7, 87.7, 133.8, 157.8, 193.8 ppm. HRMS  $m/z$  (FAB,  $[\text{M}+\text{H}]^+$ ): calcd for  $\text{C}_{16}\text{H}_{29}\text{NO}_2$ : 268.2277; found: 268.2279

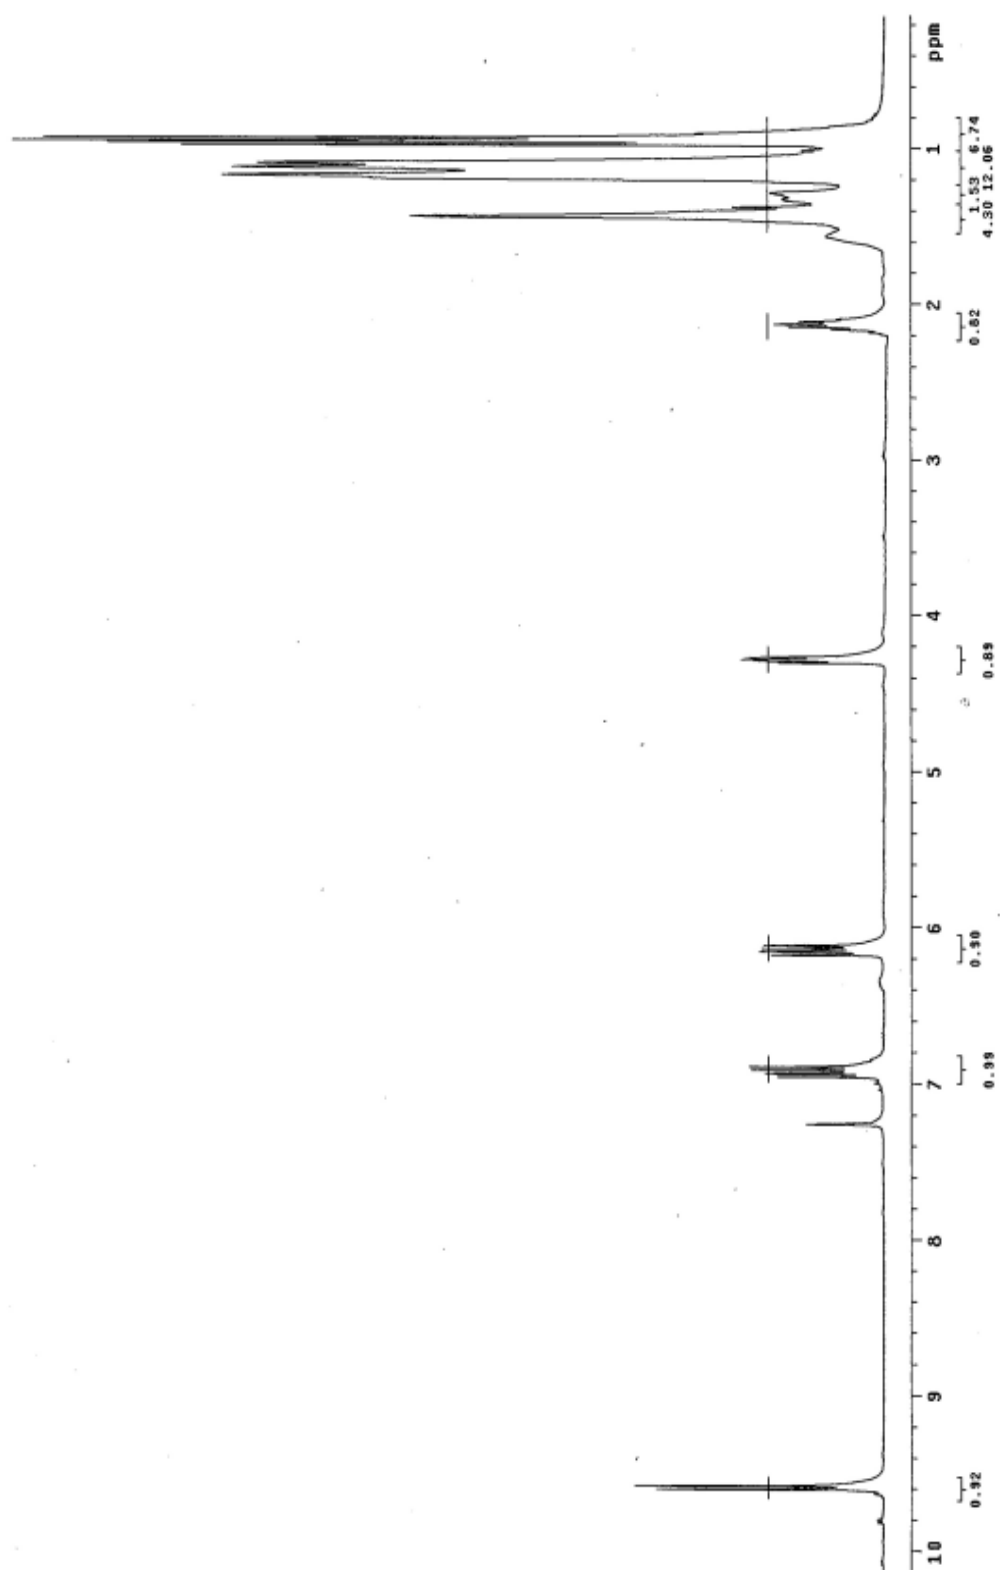

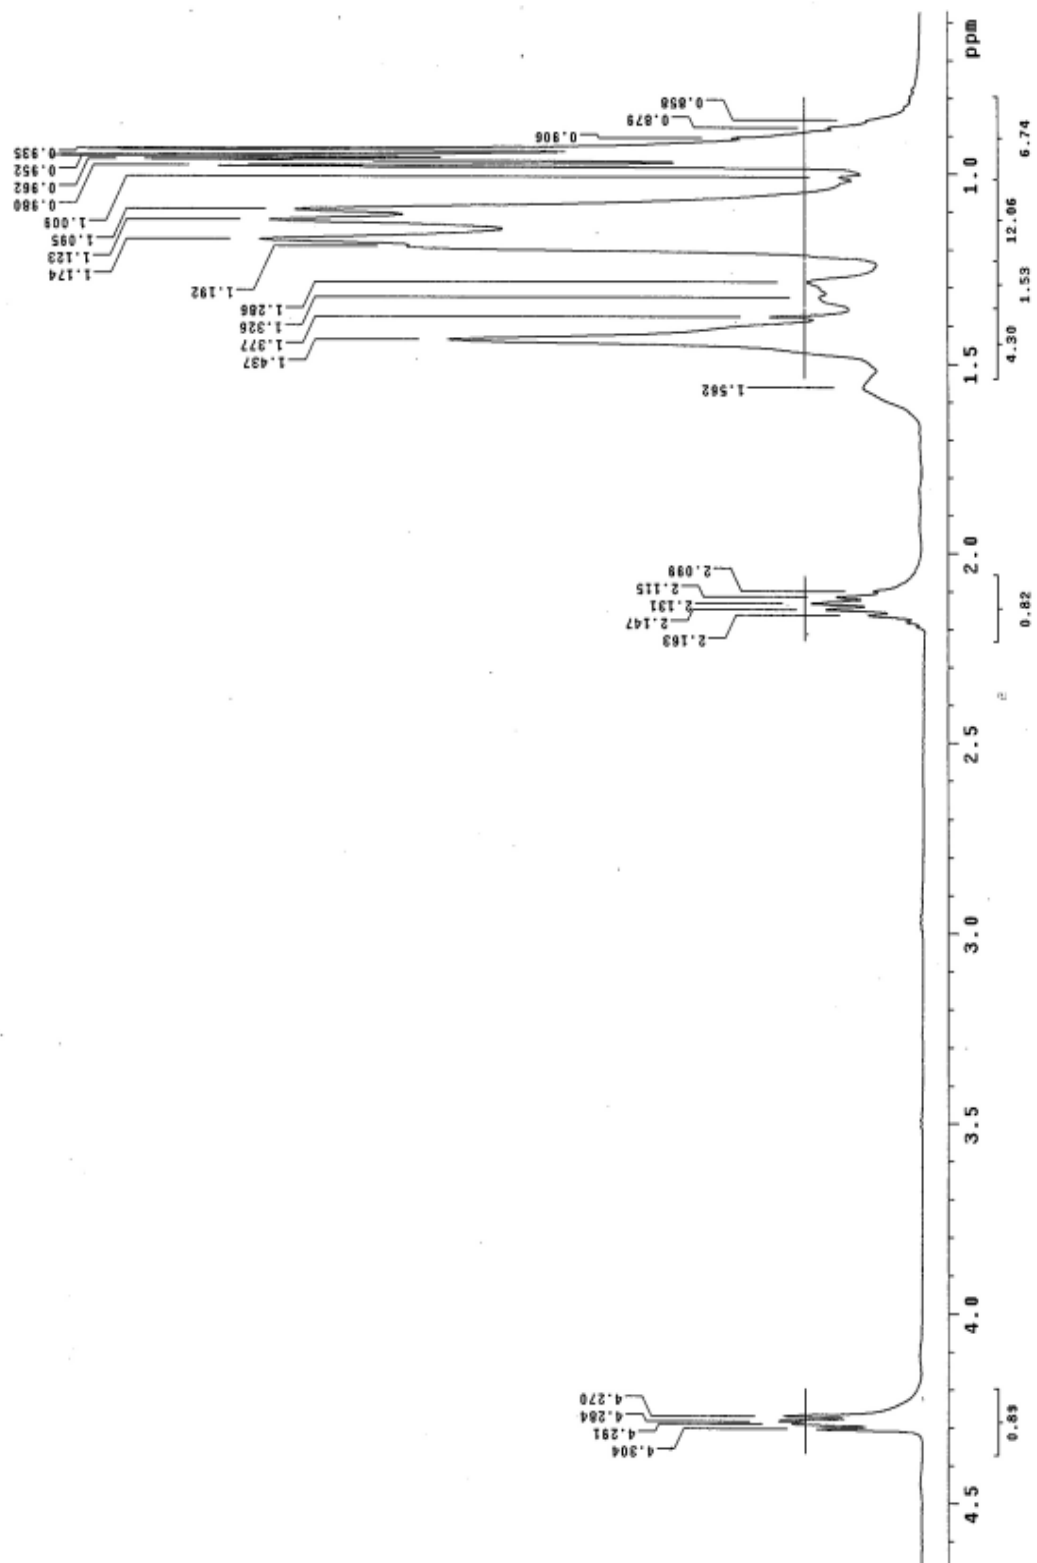

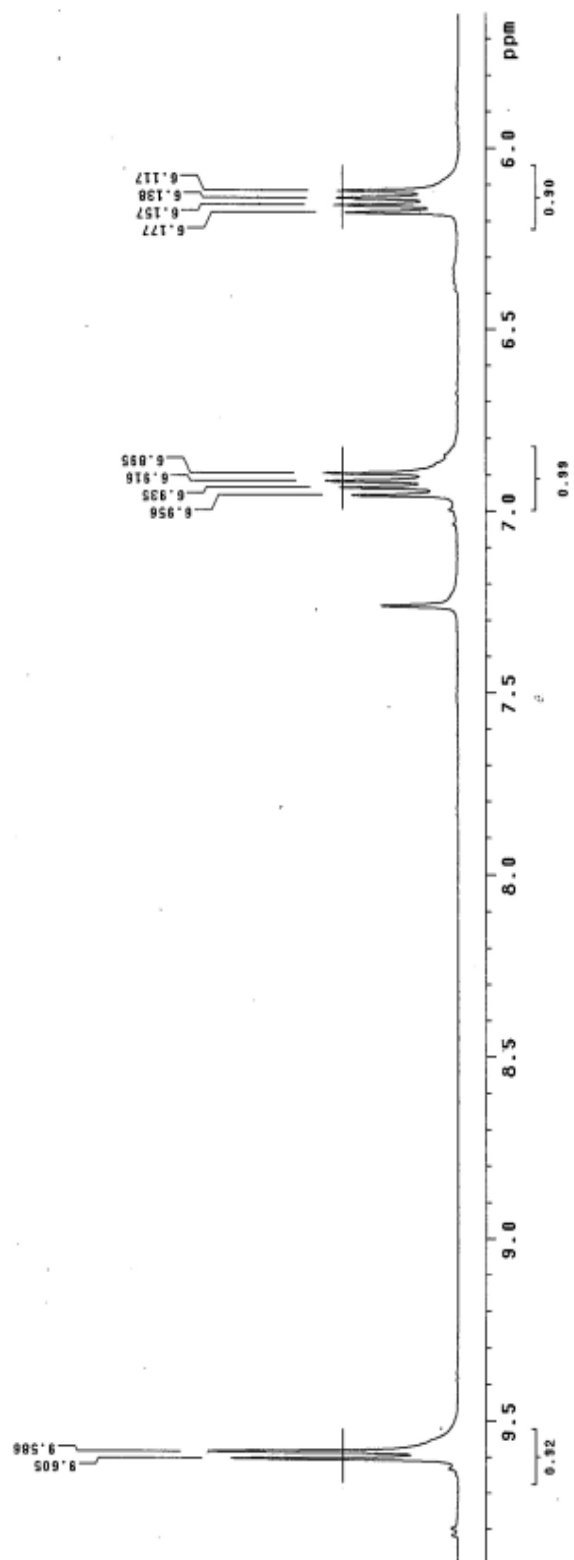

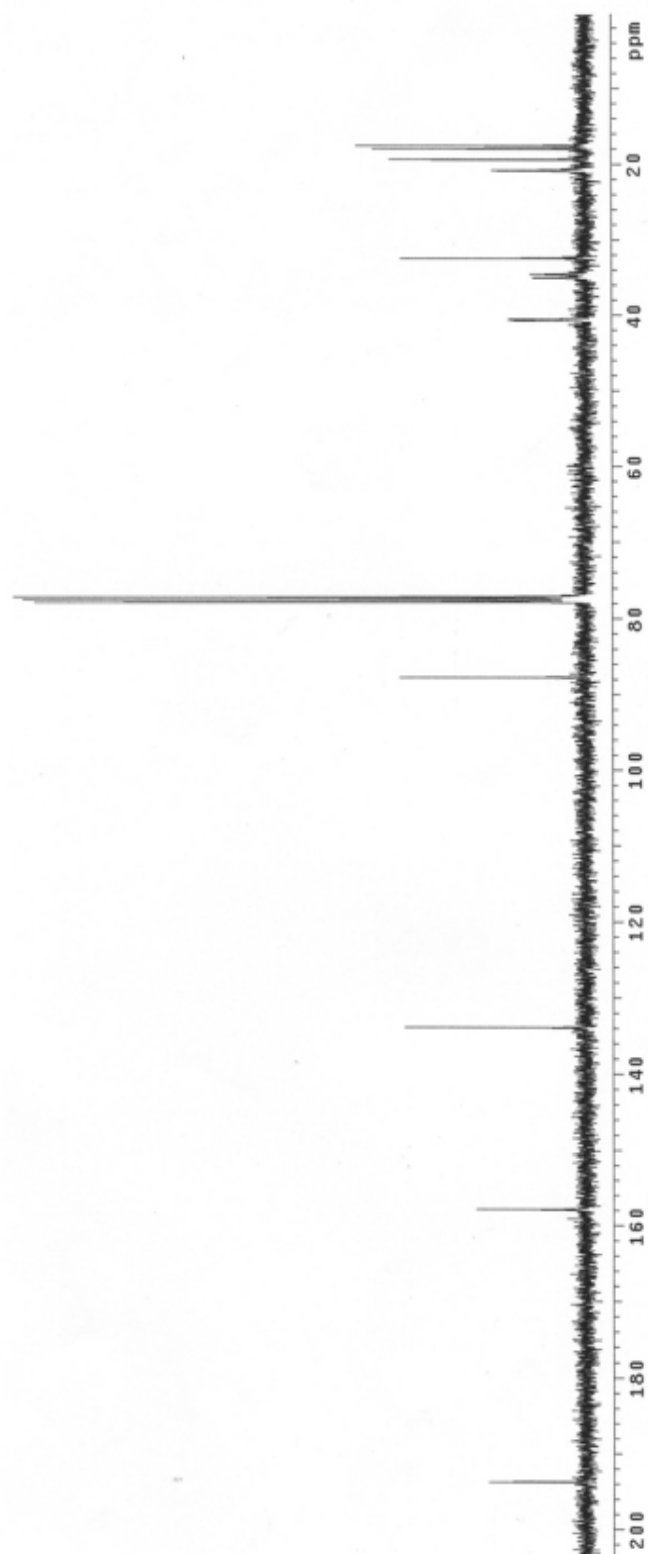

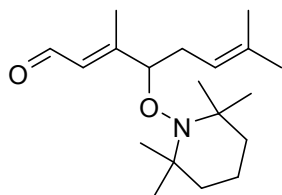

**(E)-3,7-dimethyl-4-(2,2,6,6-tetramethylpiperidin-1-yloxy)octa-2,6-dienal (9b)**  $R_f = 0.51$  in 1:4 v/v ether/hexane; isolated as an inseparable mixture with di-isomers (major/minor 81:19); colorless oil; yield 27.6 mg (0.0898 mmol, 36%). IR (KBr): 2931, 1678, 1377, 1132, 974  $\text{cm}^{-1}$ .  $^1\text{H}$  NMR ( $\text{CDCl}_3$ , 400MHz)  $\delta$ : 0.99-1.65 (major + minor, 24H), 1.97 (3H, s, minor), 2.13 (3H, s, major), (1H, m, major + minor), 2.62 (1H, m, major), 2.73 (1H, m, minor), 4.15 (dd, 1H,  $J = 4, 10$  Hz), 4.92 (1H, m, major + minor), 5.87 (1H, d,  $J = 8$  Hz, minor), 5.92 (1H, d,  $J = 8$  Hz, major), 9.90 (1H, d,  $J = 8.4$  Hz, minor), 10.01 (1H, d,  $J = 8$  Hz, major) ppm.  $^{13}\text{C}$  NMR ( $\text{CDCl}_3$ , 100MHz)  $\delta$ : 14.2, 17.5, 18.4, 20.6, 26.2, 31.5, 34.4, 40.7, 40.8, 83.6 (minor), 89.6 (major), 118.9, 128.5 (major), 130.0 (minor), 134.2 (major), 162.0 (minor), 162.6 (major), 191.4 (minor), 191.6 (major). HRMS  $m/z$  (FAB,  $[\text{M}+\text{H}]^+$ ): calcd for  $\text{C}_{19}\text{H}_{33}\text{NO}_2$ : 308.2590; found: 308.2593

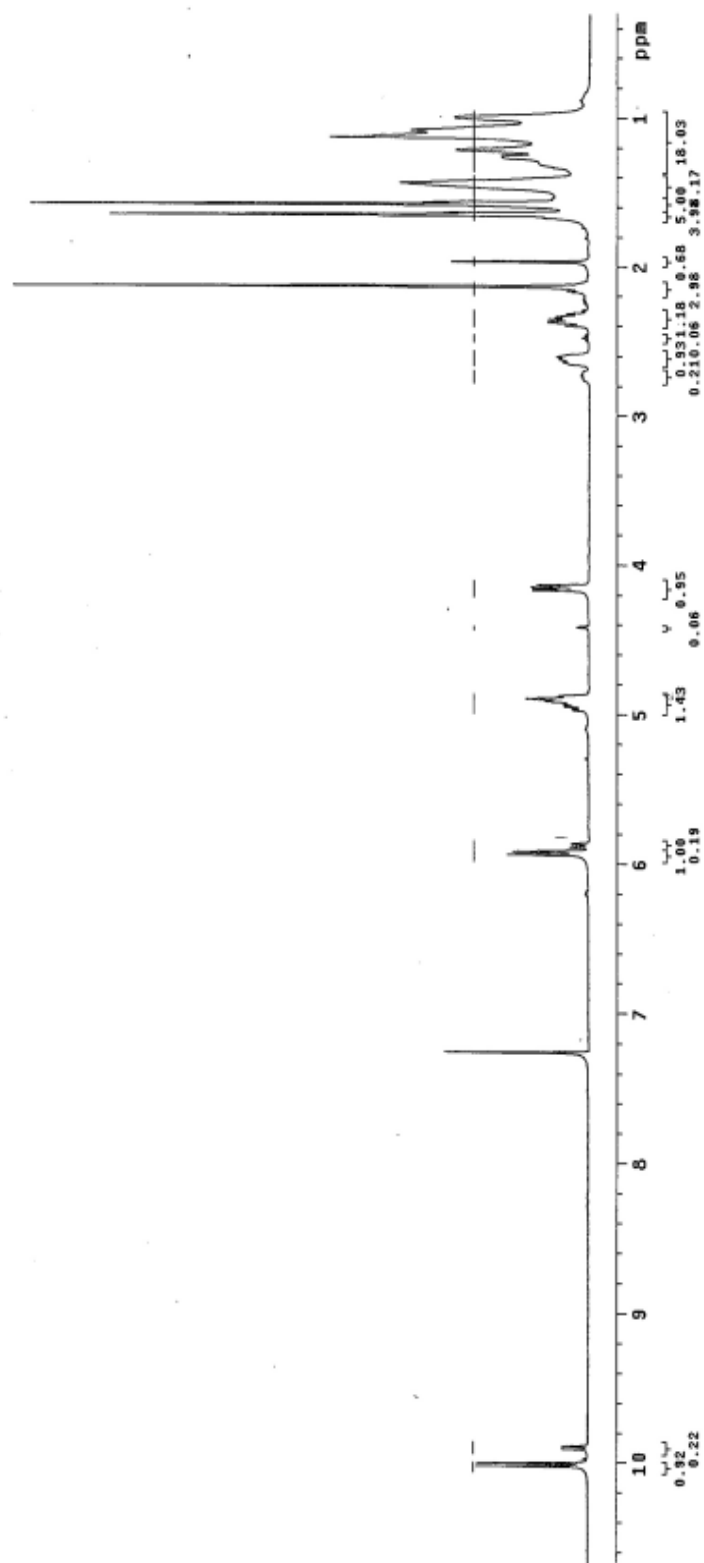

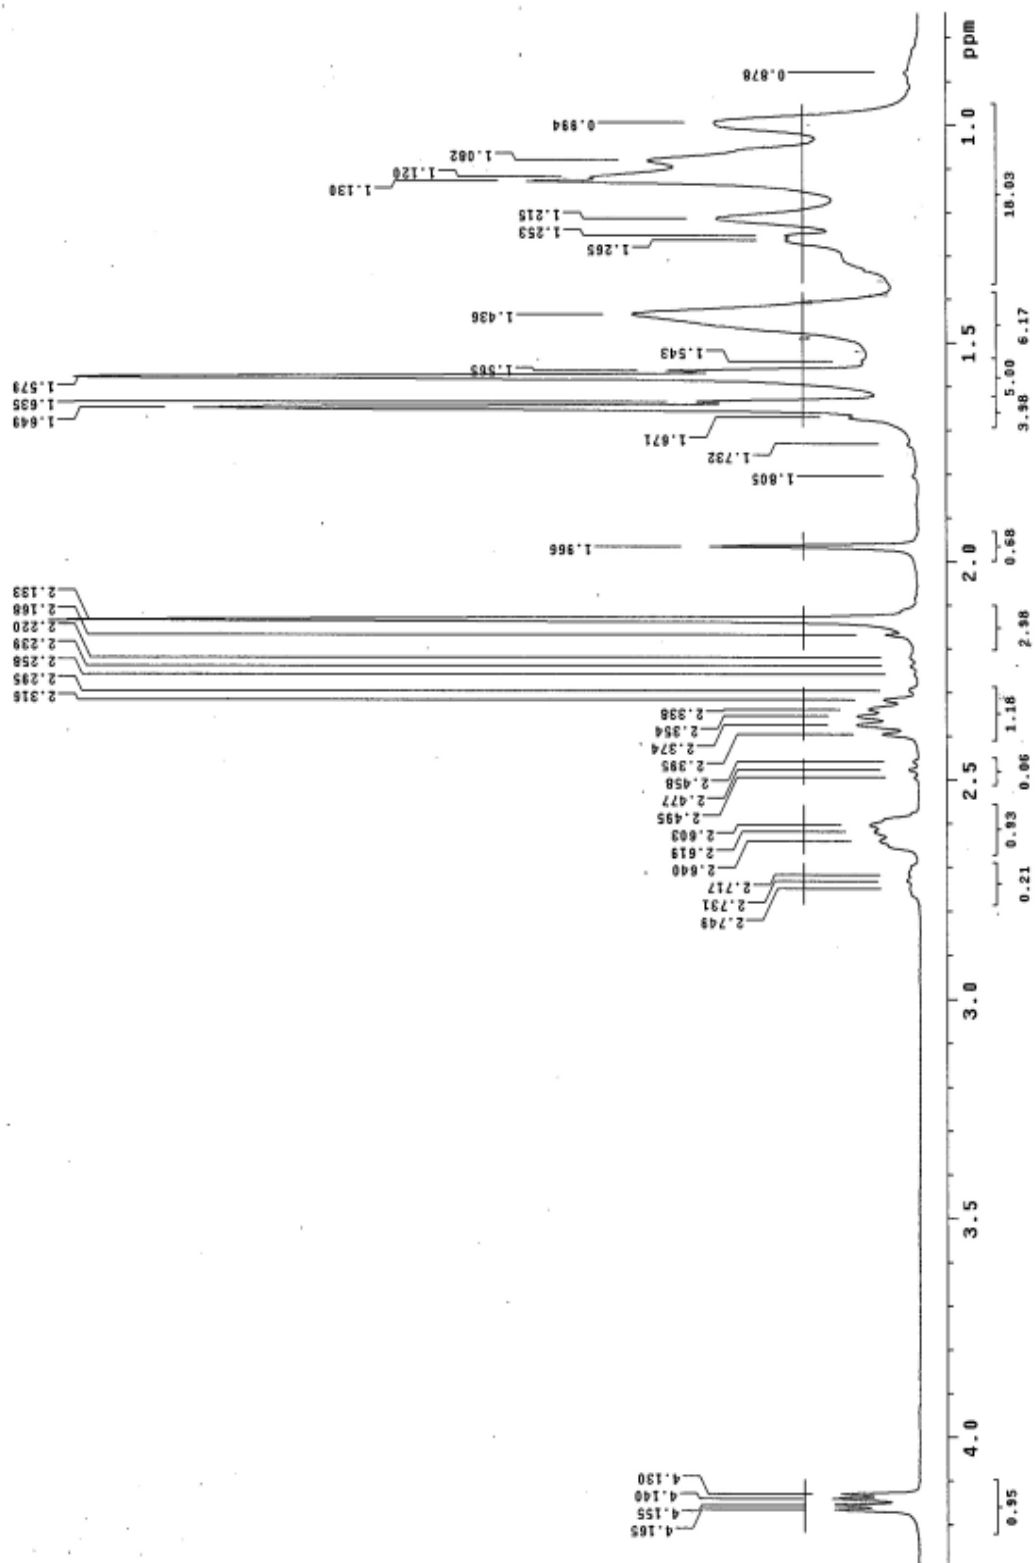



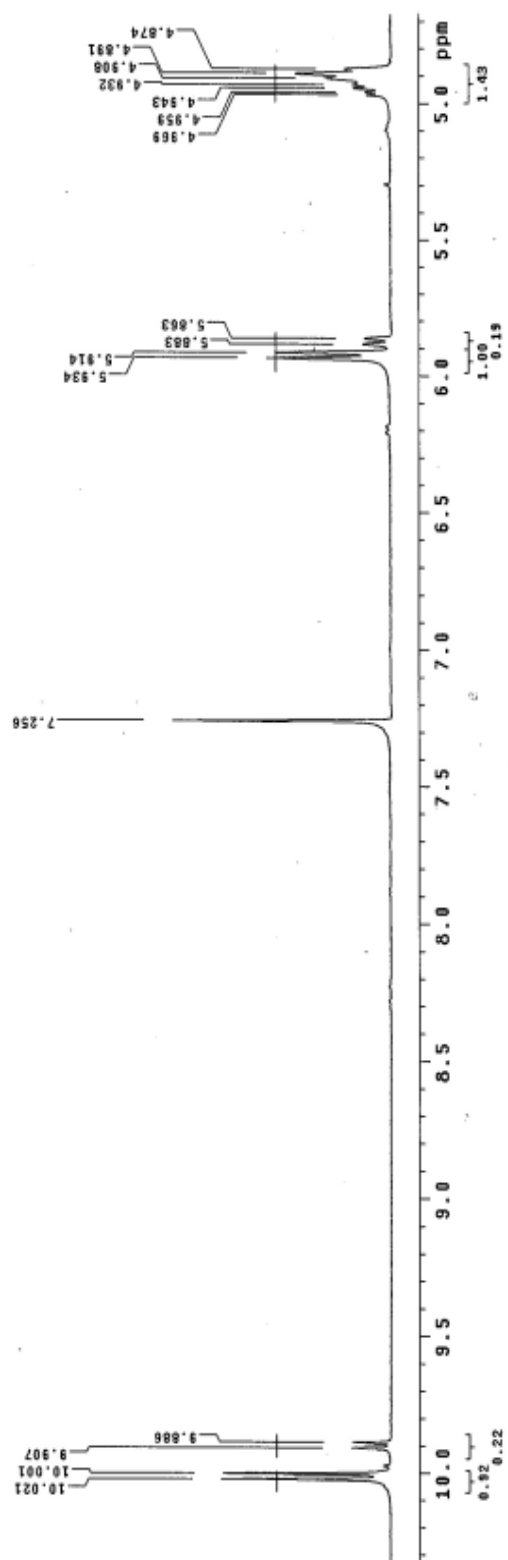

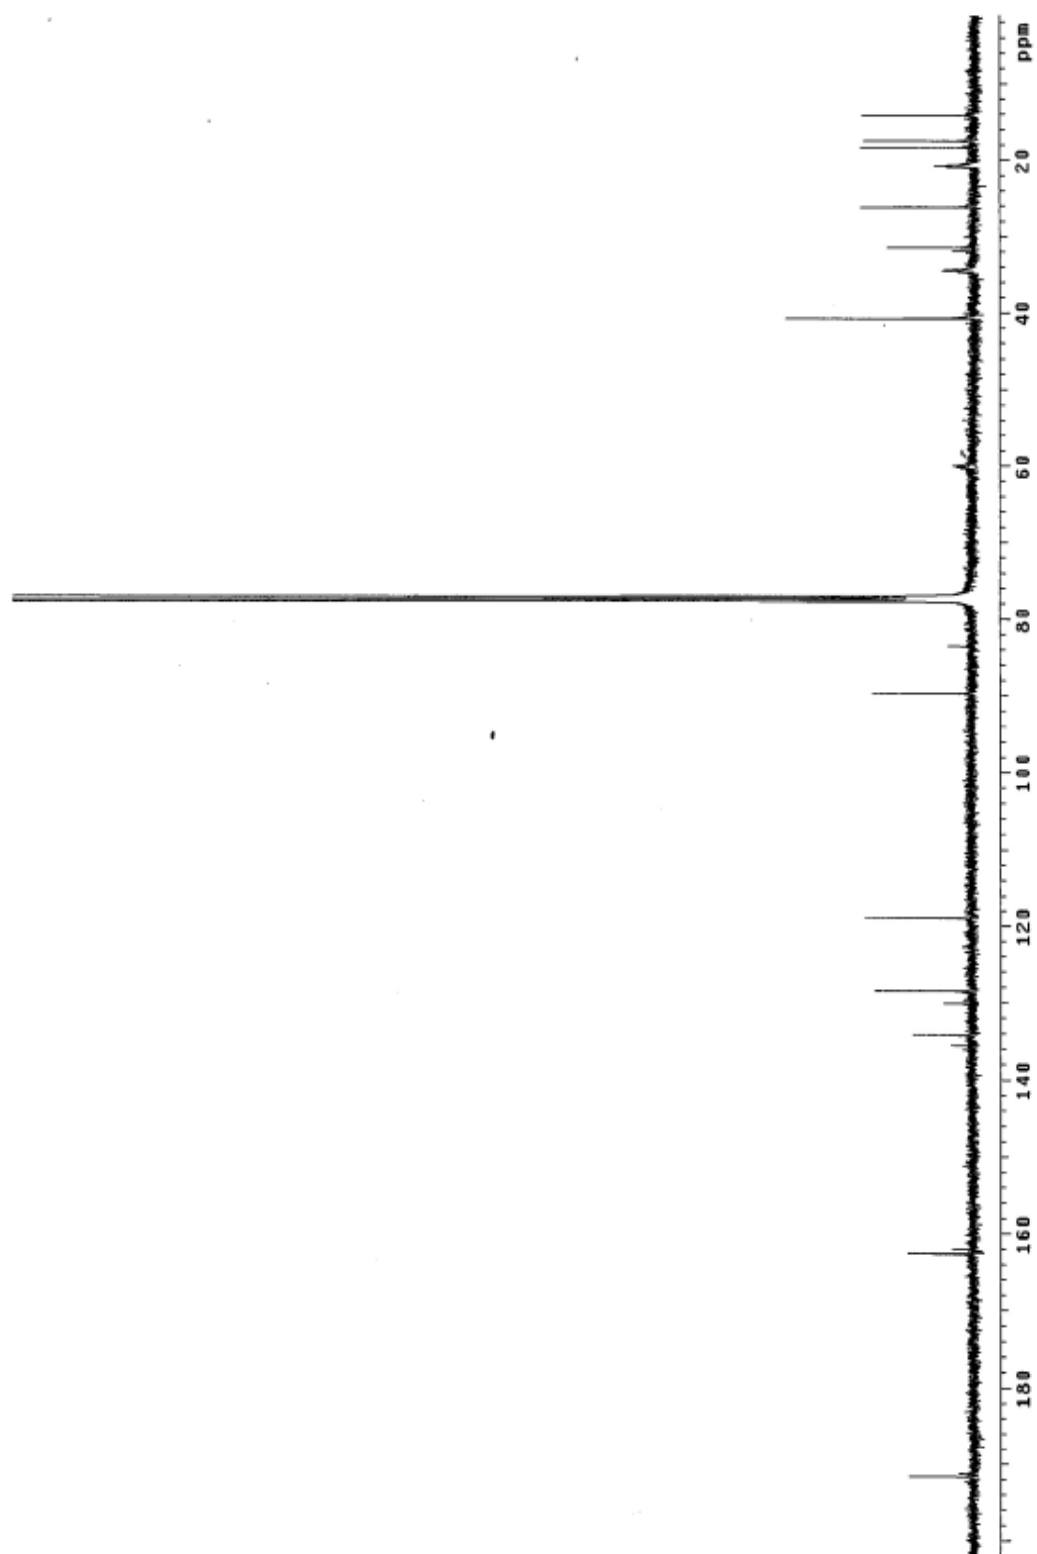

**c**

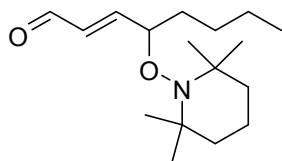

**(E)-4-(2,2,6,6-tetramethylpiperidin-1-yloxy)oct-2-enal (10b)**  $R_f$  = 0.67 in 1:4 v/v ether/hexane; colorless oil; yield 18.9 mg (0.0067 mmol, 27%). IR (KBr): 2932, 1695, 1376, 1132, 983  $\text{cm}^{-1}$ .  $^1\text{H}$  NMR ( $\text{CDCl}_3$ , 400MHz) (major): 0.89-1.81 (27H, m), 4.43 (1H, m), 6.13 (1H, dd,  $J$  = 7.6, 16 Hz), 6.87 (1H, dd,  $J$  = 8, 16 Hz), 9.57 (1H, d,  $J$  = 7.6 Hz) ppm.  $^{13}\text{C}$  NMR ( $\text{CDCl}_3$ , 100MHz)  $\delta$ : 14.4, 17.6, 20.7, 23.2, 27.6, 34.0, 34.4, 35.1, 40.5, 83.6, 132.1, 159.7, 193.9 ppm. HRMS  $m/z$  (FAB,  $[\text{M}+\text{H}]^+$ ): calcd for  $\text{C}_{17}\text{H}_{31}\text{NO}_2$ : 282.2433; found: 282.2430

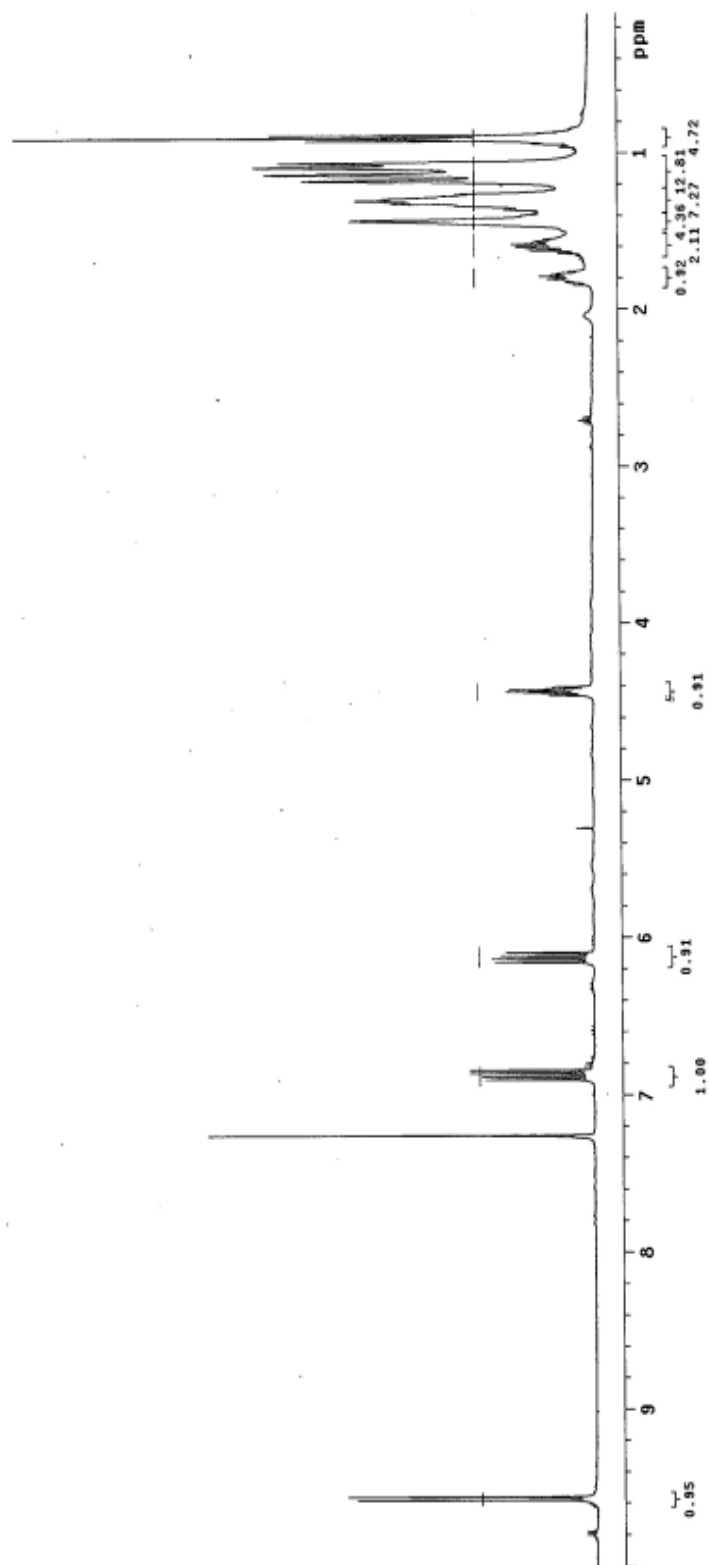

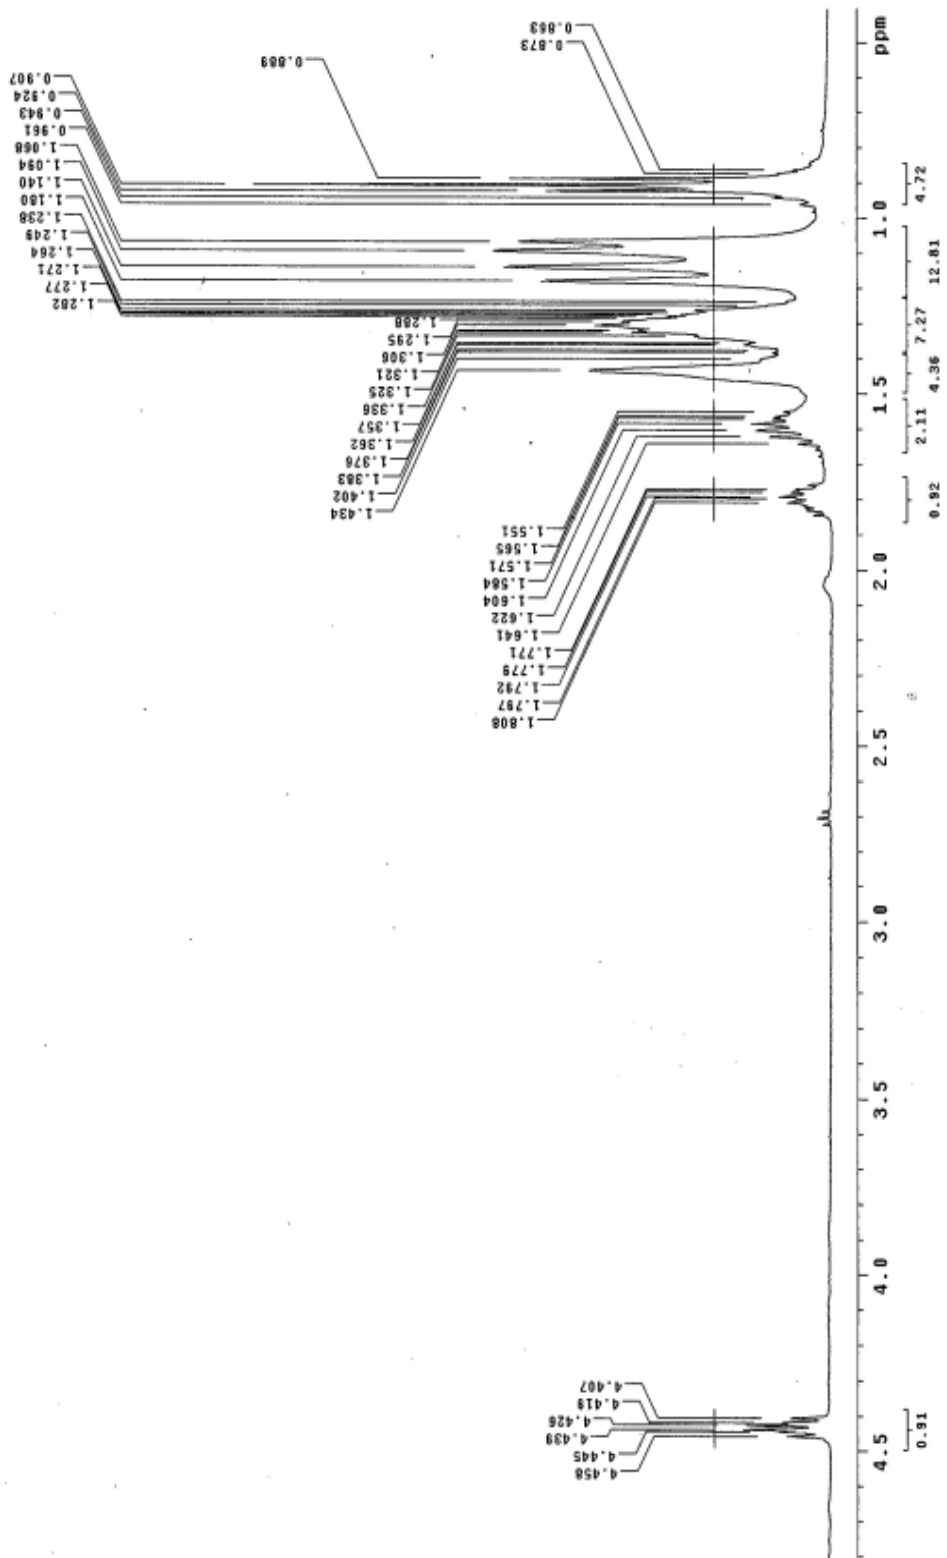

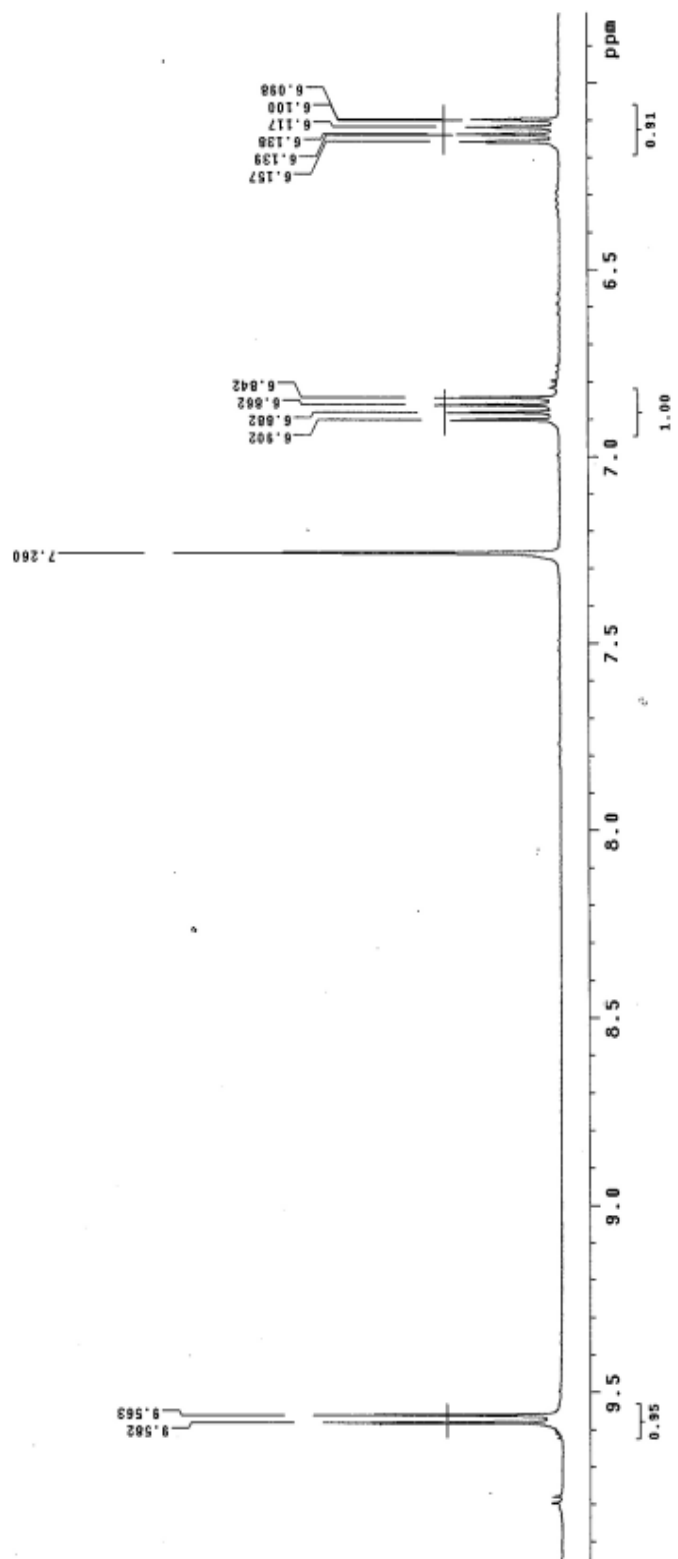

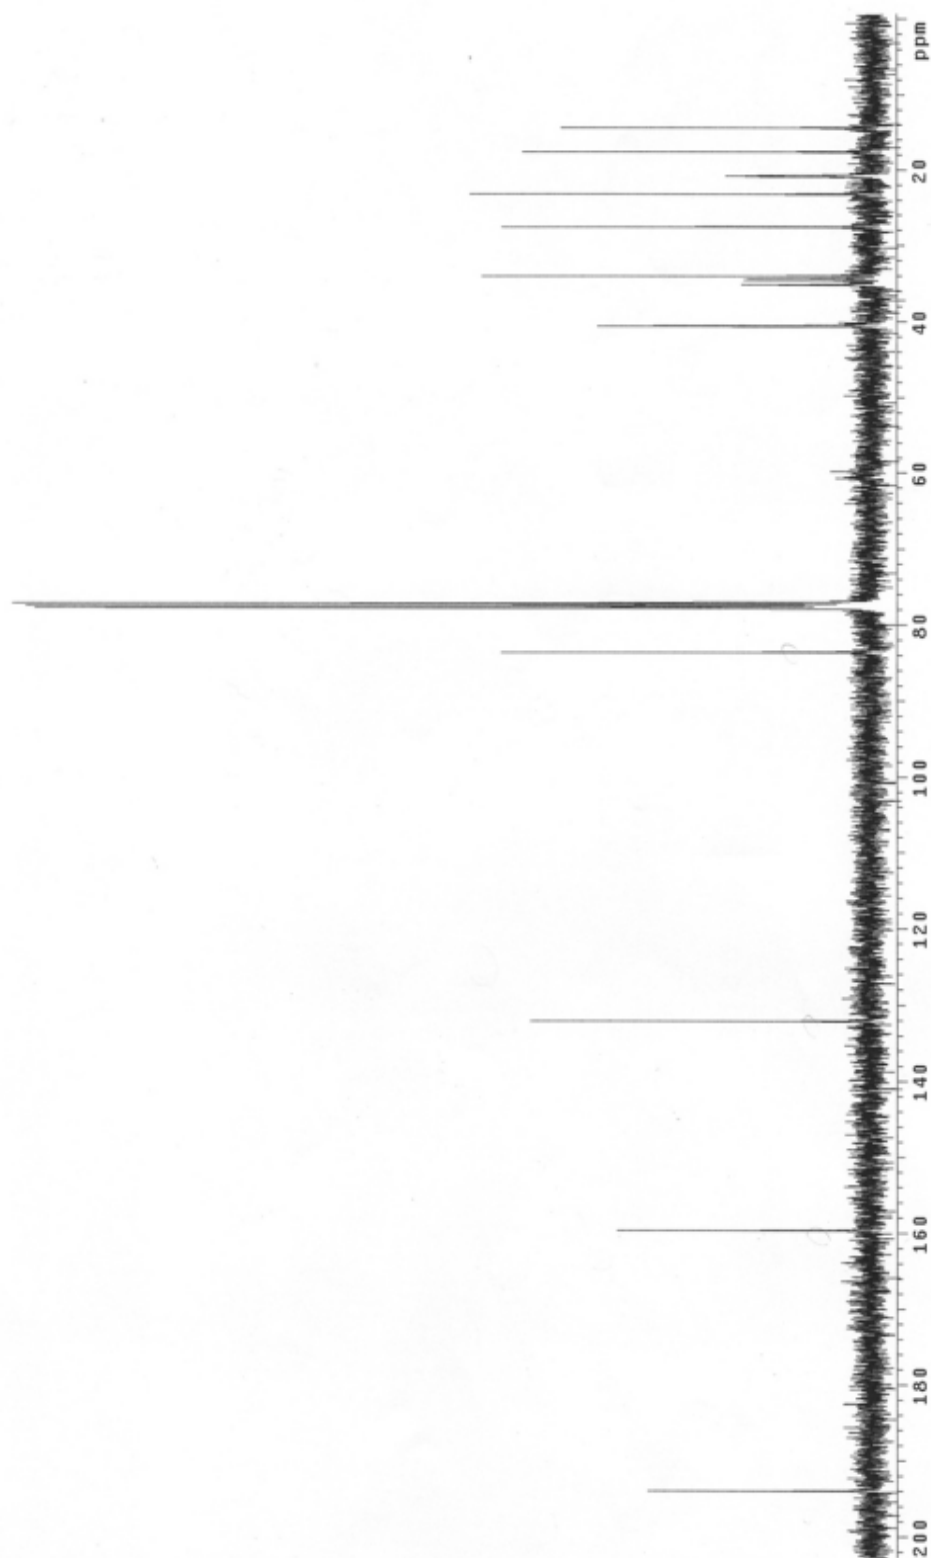

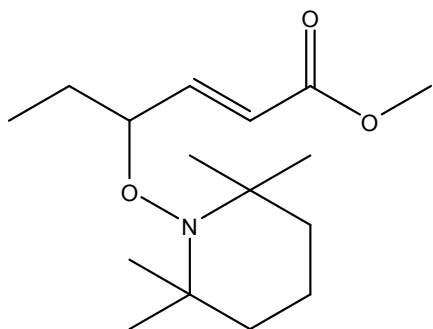

**(E)-methyl 4-(2,2,6,6-tetramethylpiperidin-1-yloxy)hex-2-enoate (2c)**

IR (KBr):  $\nu_{\text{max}}$  = 2972, 2934, 1730, 1463, 1375, 1173  $\text{cm}^{-1}$ .  $^1\text{H}$  NMR (400 MHz,  $\text{CDCl}_3$ ):  $\delta$  = 0.87 (t, 3 H,  $J$  = 7.6 Hz), 1.05-1.42 (m, 18 H), 1.53-1.62 (m, 1 H), 1.74-1.81 (m, 1 H), 3.73 (s, 3 H), 4.20 (dt, 1 H,  $J$  = 8.0, 4.8 Hz), 5.85 (dd, 1 H,  $J$  = 15.6, 1.2 Hz), 6.89 (ddd, 1 H,  $J$  = 15.6, 8.0, 0.8 Hz).  $^{13}\text{C}$  NMR (100 MHz,  $\text{CDCl}_3$ ):  $\delta$  = 9.4, 17.2, 20.3, 20.4, 26.7, 34.0, 34.6, 40.2, 51.4, 59.5, 60.1, 84.3, 120.6, 150.2, 166.6. HRMS  $m/z$  (FAB,  $[\text{M}+\text{H}]^+$ ): calcd for  $\text{C}_{16}\text{H}_{29}\text{NO}_3$ : 284.2226; found: 284.2224.



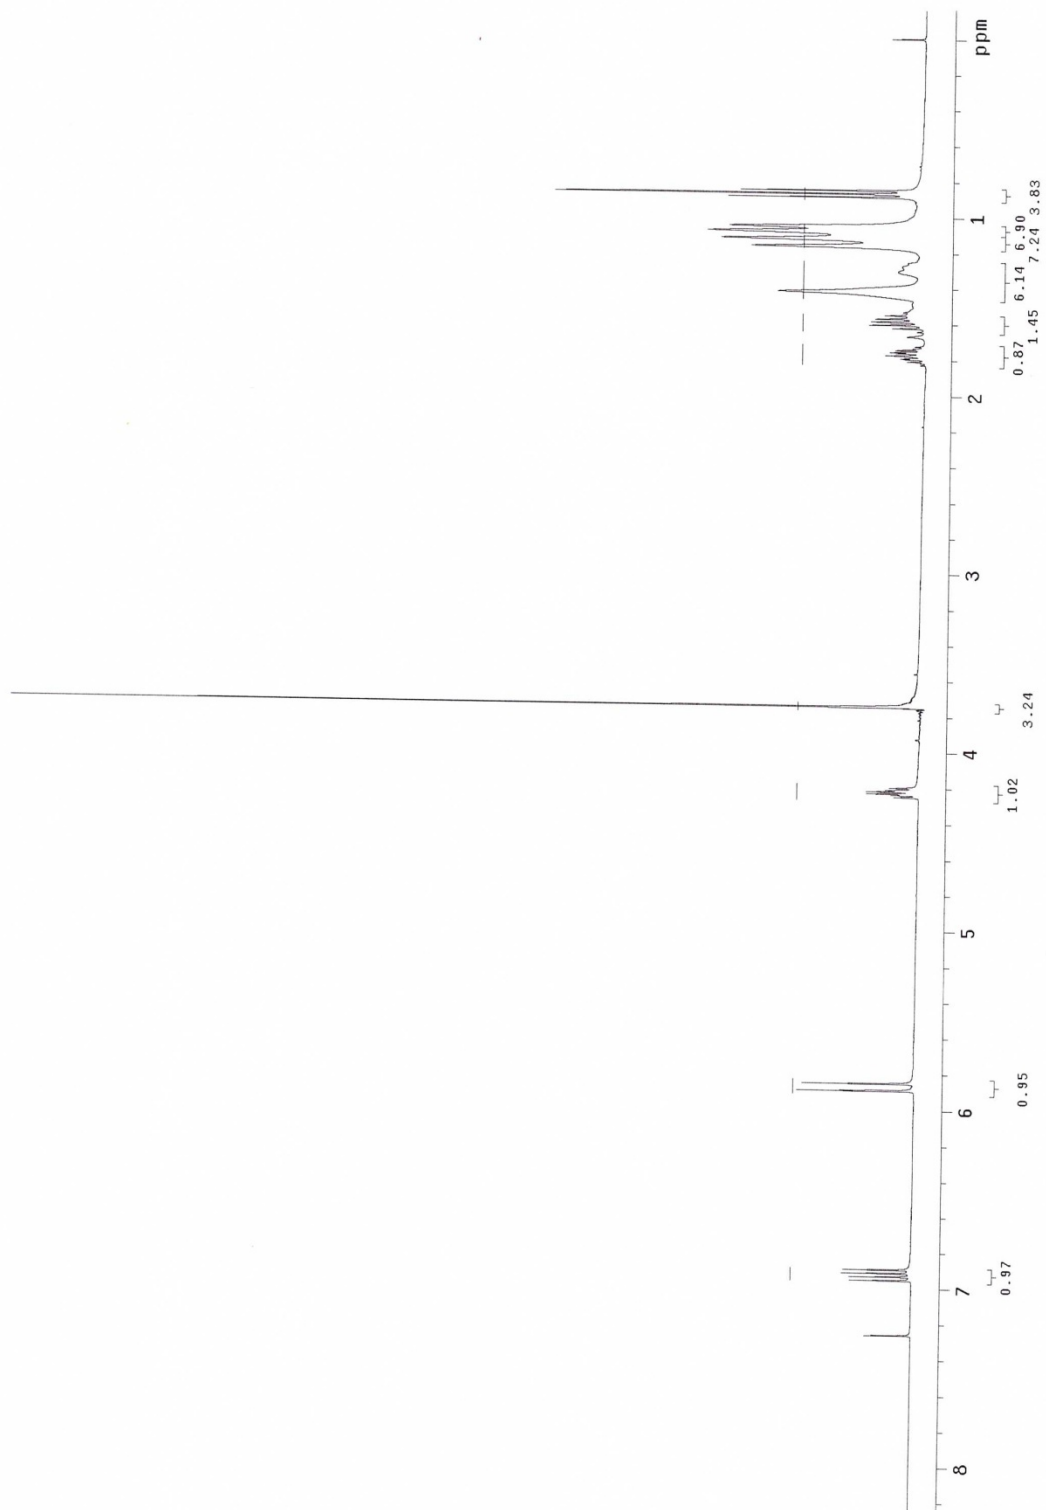

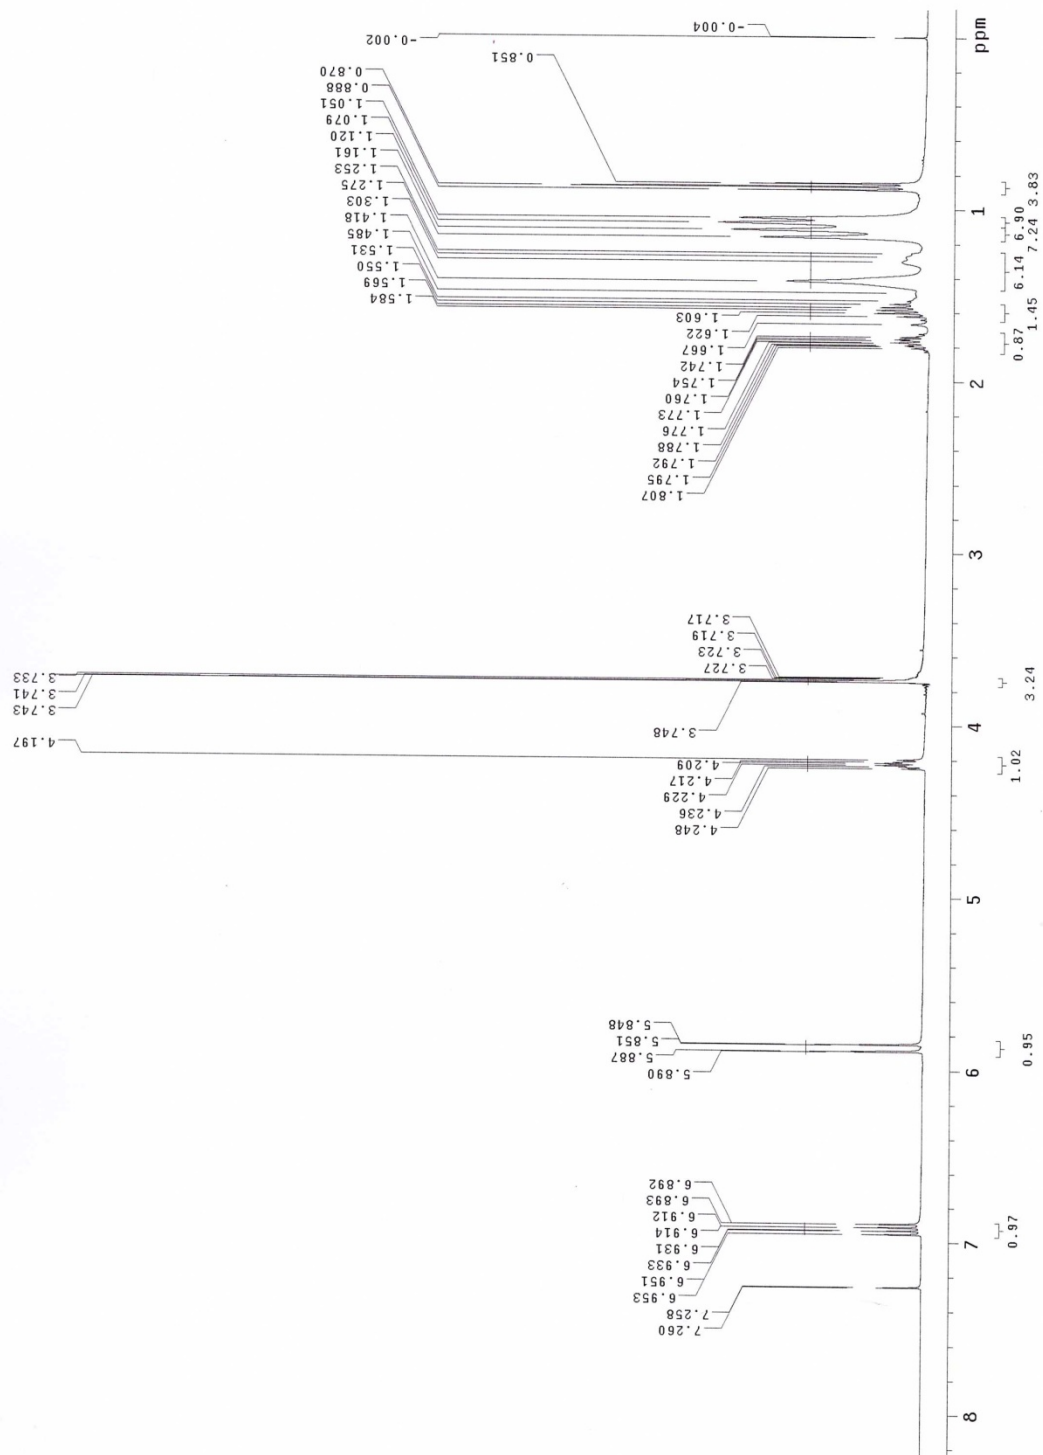

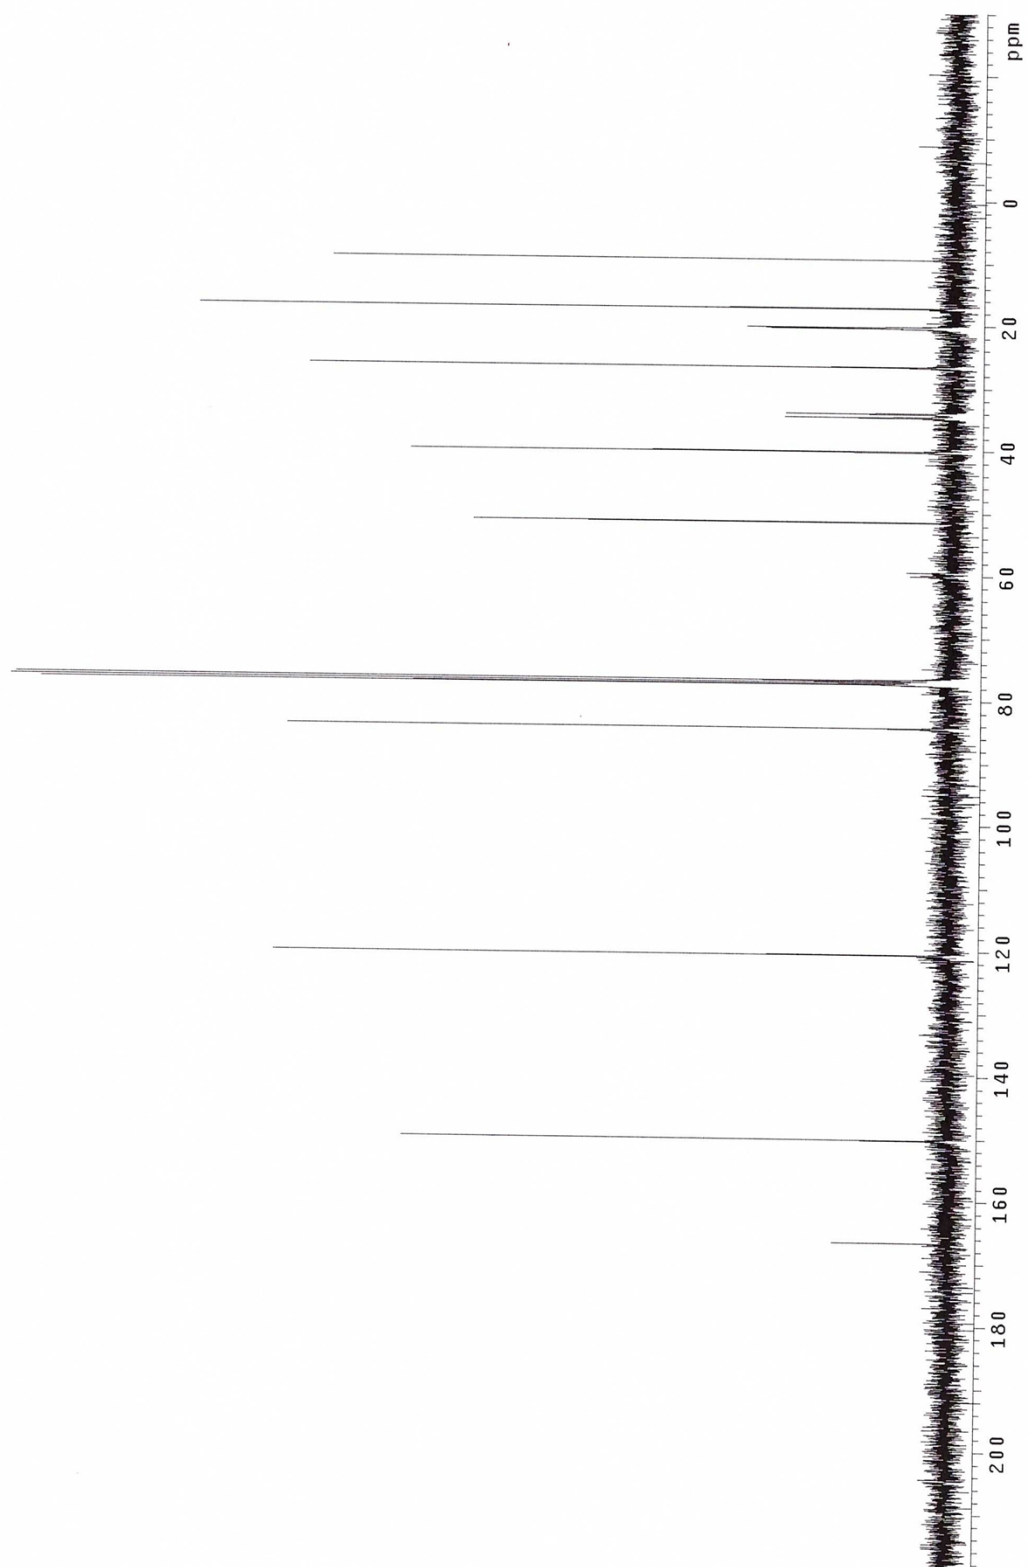

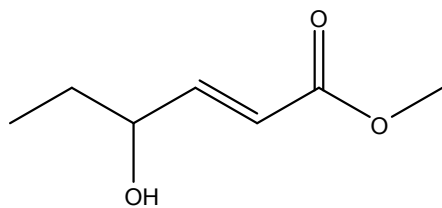

**(E)-methyl 4-hydroxyhex-2-enoate (2d)**

IR (KBr):  $\nu_{\text{max}}$  = 3446, 2934, 1726, 1377, 1173  $\text{cm}^{-1}$ .  $^1\text{H}$  NMR (400 MHz,  $\text{CDCl}_3$ ):  $\delta$  = 0.97 (dt, 3 H,  $J$  = 7.2, 2.4 Hz), 1.60-1.70 (m, 3 H), 3.75 (s, 3 H), 4.23-4.26 (m, 1 H), 6.03 (dd, 1 H,  $J$  = 16.0, 1.6 Hz), 6.92 (dd, 1 H,  $J$  = 15.6, 4.8 Hz).  $^{13}\text{C}$  NMR (100 MHz,  $\text{CDCl}_3$ ):  $\delta$  = 9.6, 29.7, 51.7, 72.3, 119.8, 149.9, 166.7. HRMS  $m/z$  (EI,  $[\text{M}]^+$ ): calcd for  $\text{C}_7\text{H}_{12}\text{O}_3$ : 144.0786; found: 144.0783.

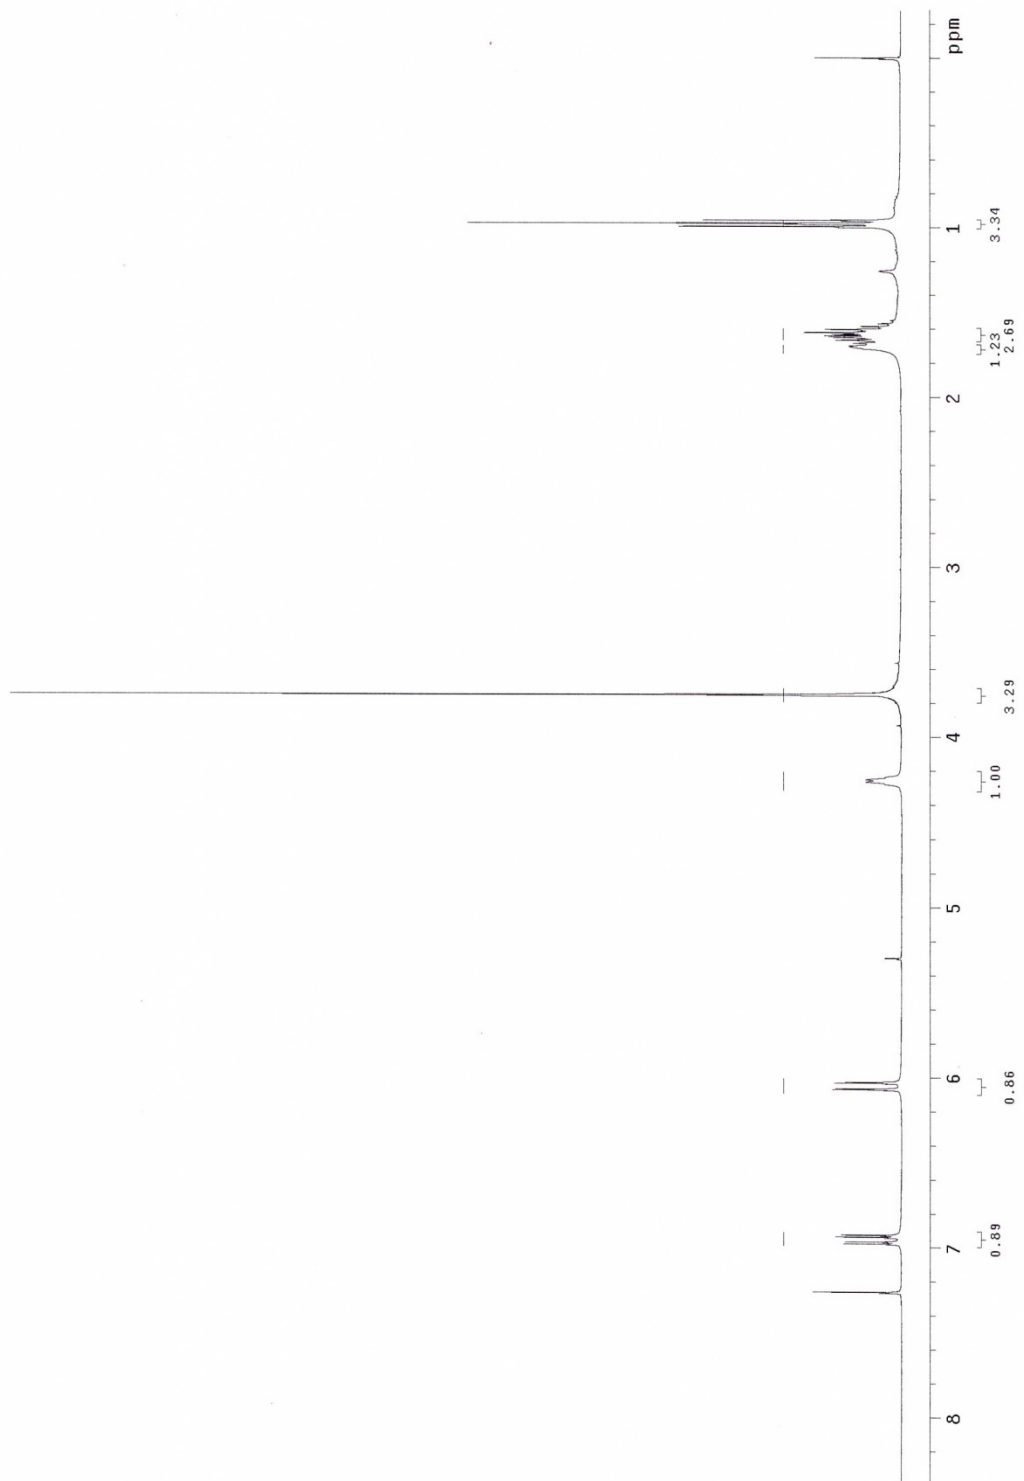

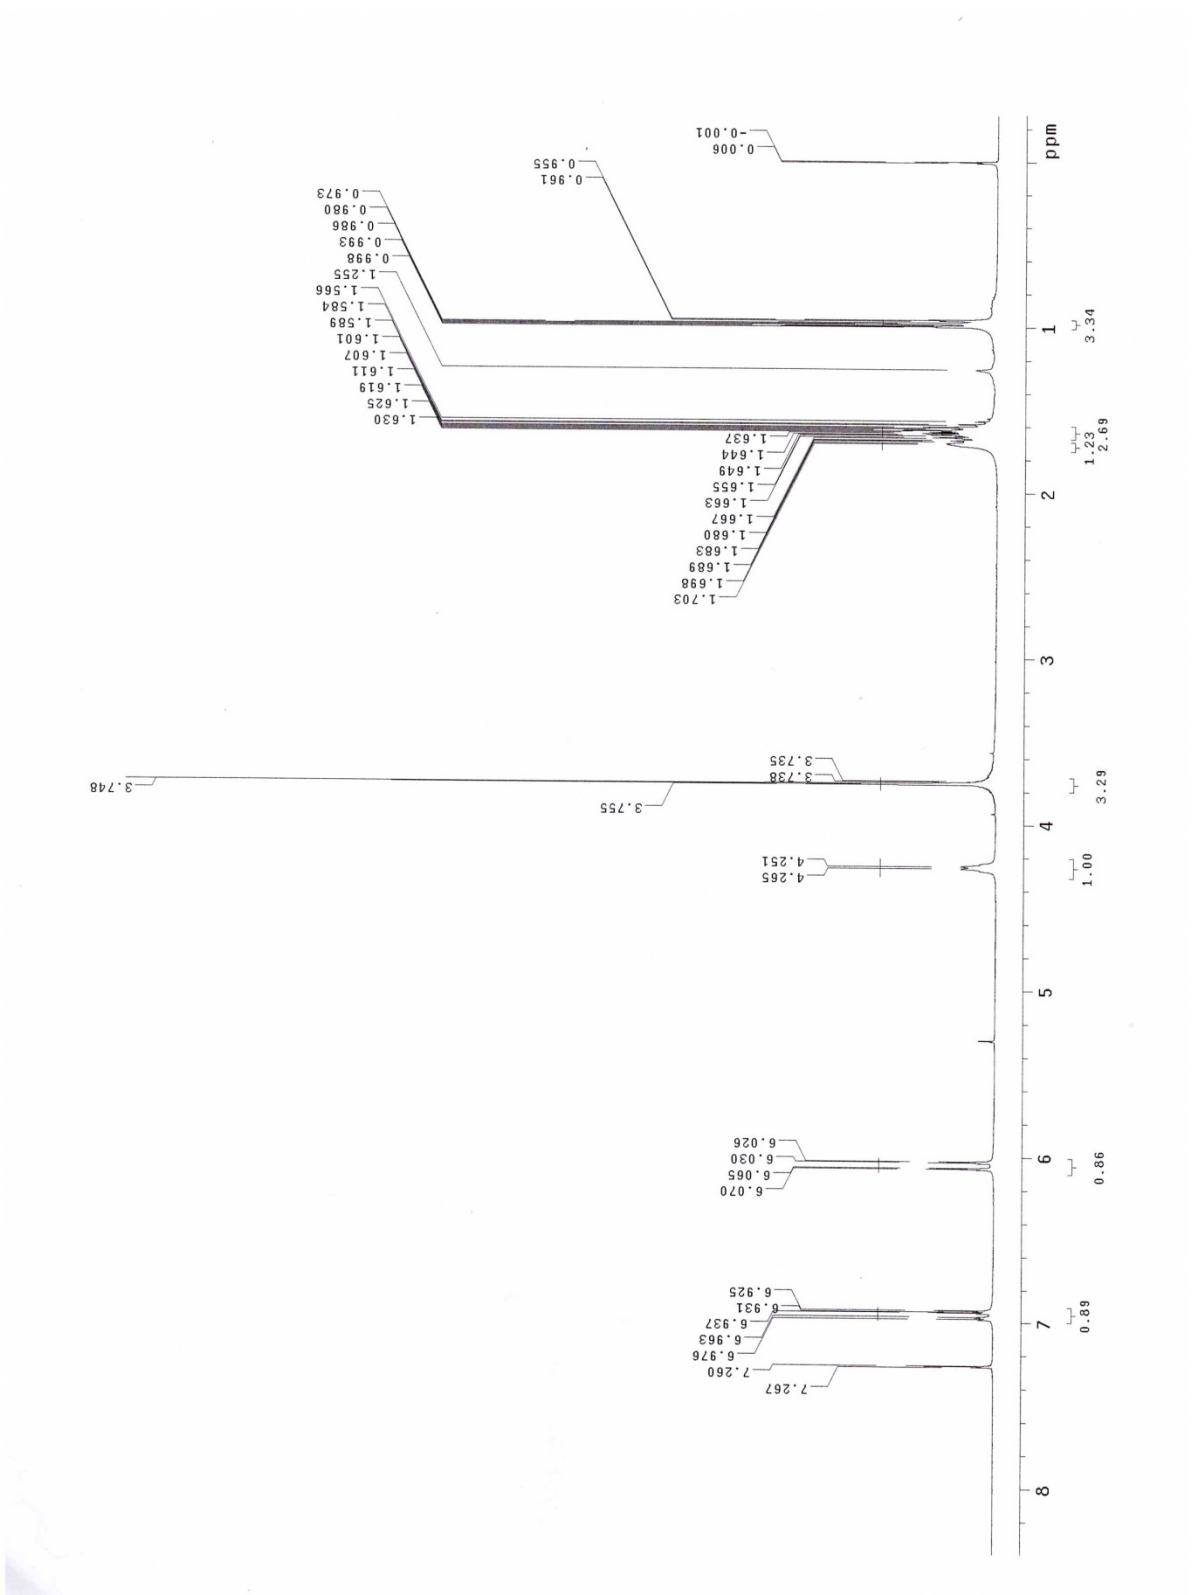

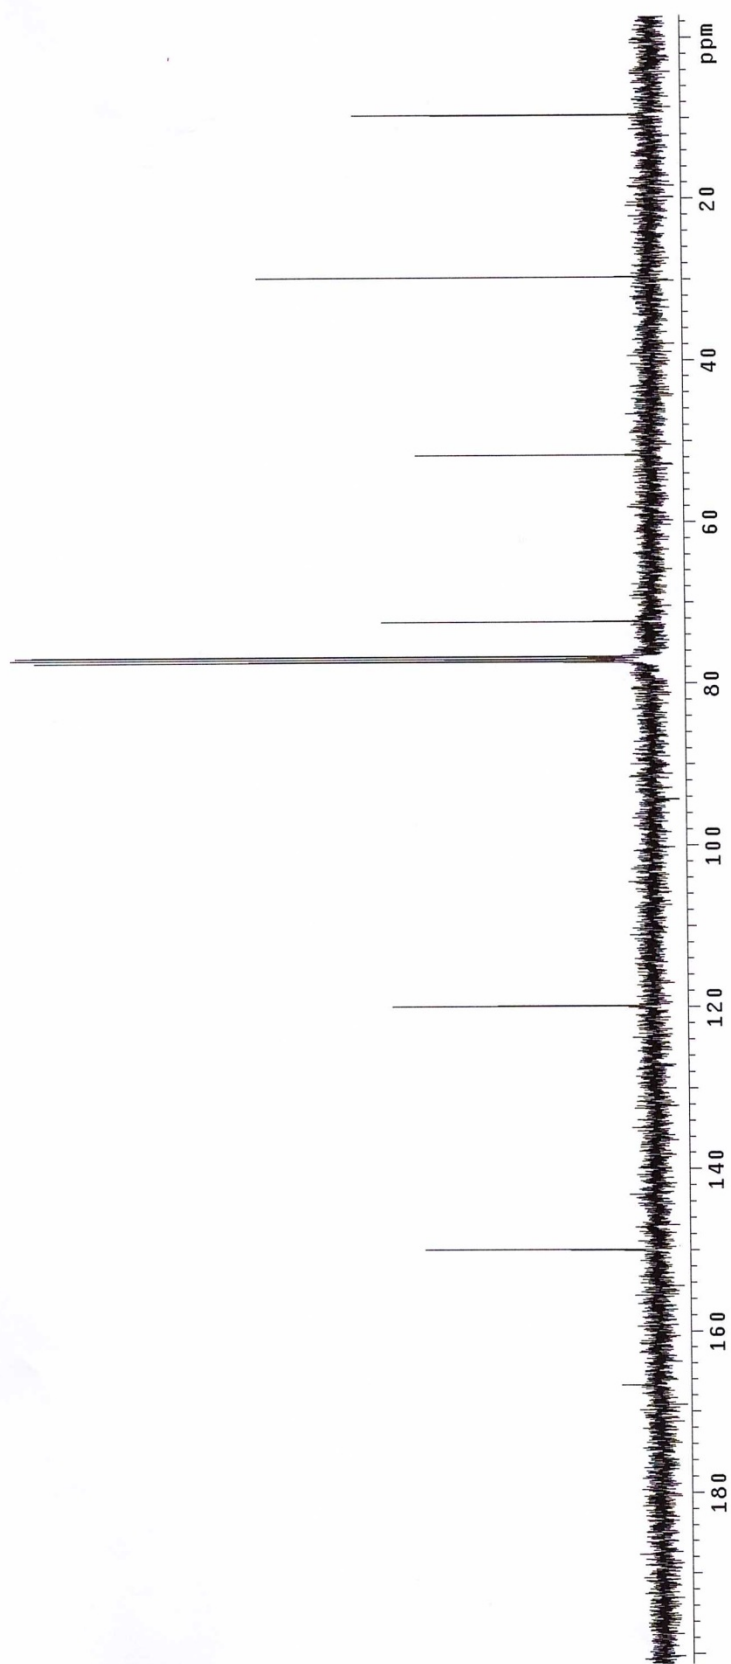

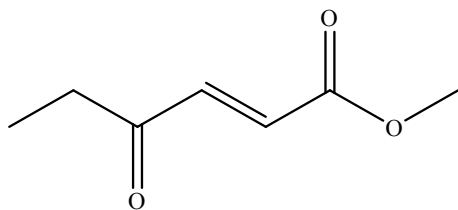

**(E)-methyl 4-oxohex-2-enoate (2e)**

IR (KBr):  $\nu_{\text{max}}$  = 2976, 1730, 1669, 1317, 1288, 1180  $\text{cm}^{-1}$ .  $^1\text{H}$  NMR (400 MHz,  $\text{CDCl}_3$ ):  $\delta$  = 1.14 (t, 3 H,  $J$  = 7.2 Hz), 2.64 (q, 2 H,  $J$  = 7.2 Hz), 3.81 (s, 3 H), 6.66 (d, 1 H,  $J$  = 16.0 Hz), 7.06 (d, 1 H,  $J$  = 16.0 Hz).  $^{13}\text{C}$  NMR (100 MHz,  $\text{CDCl}_3$ ):  $\delta$  = 7.7, 35.0, 52.4, 129.9, 139.2, 165.8, 199.7. HRMS  $m/z$  (EI,  $[\text{M}]^+$ ): calcd for  $\text{C}_7\text{H}_{10}\text{O}_3$ : 142.0630; found: 142.0630.



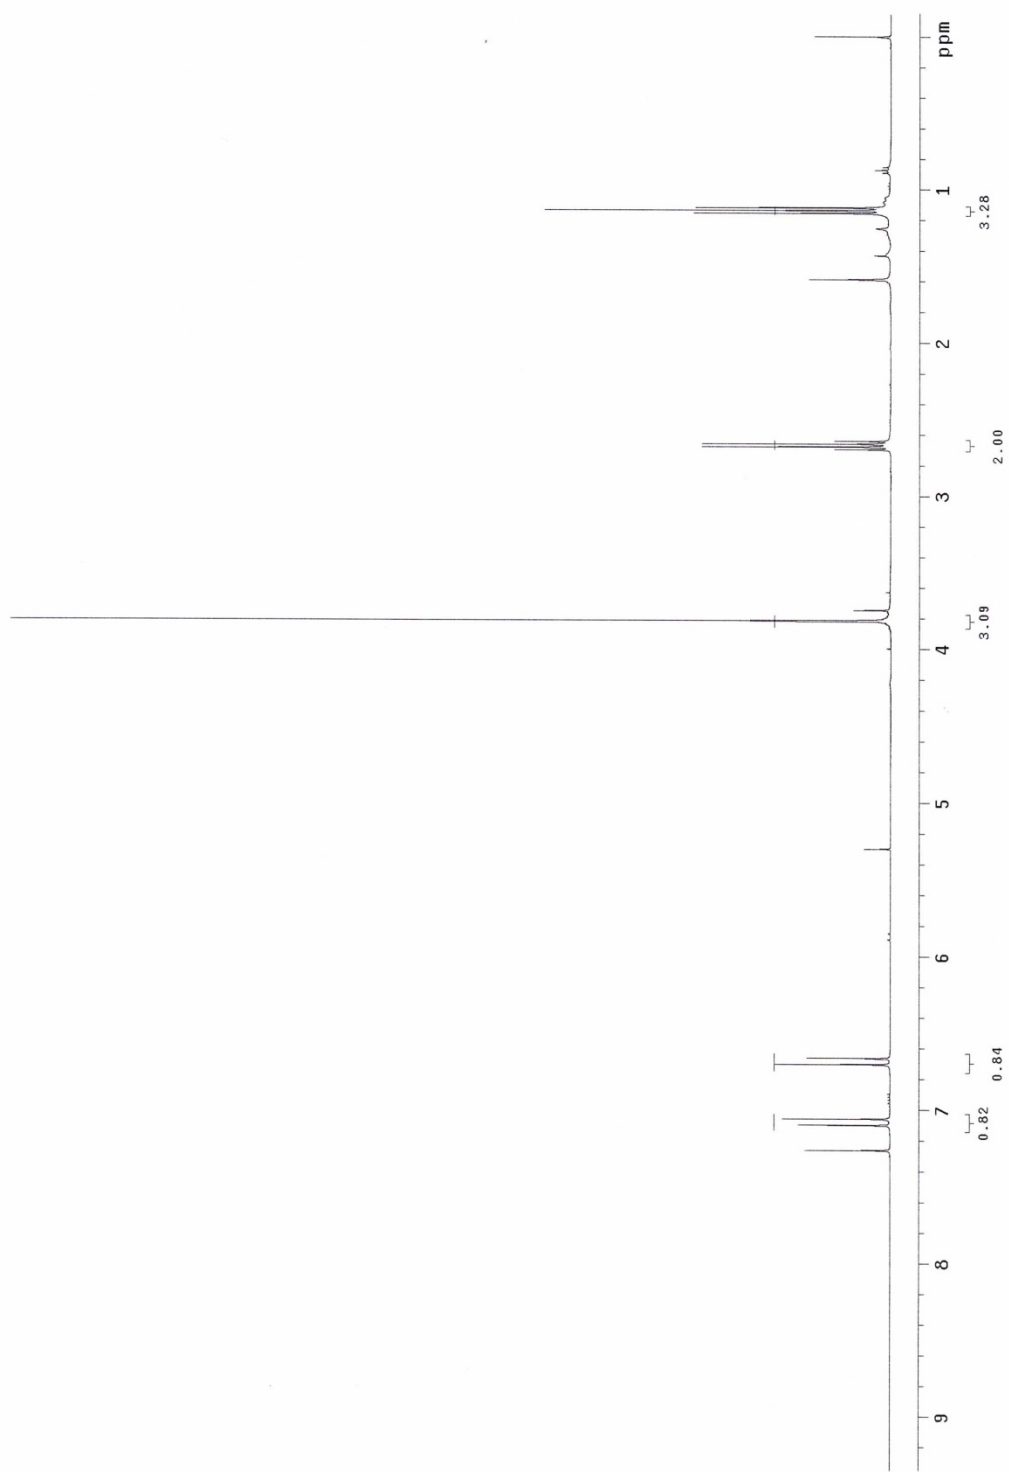

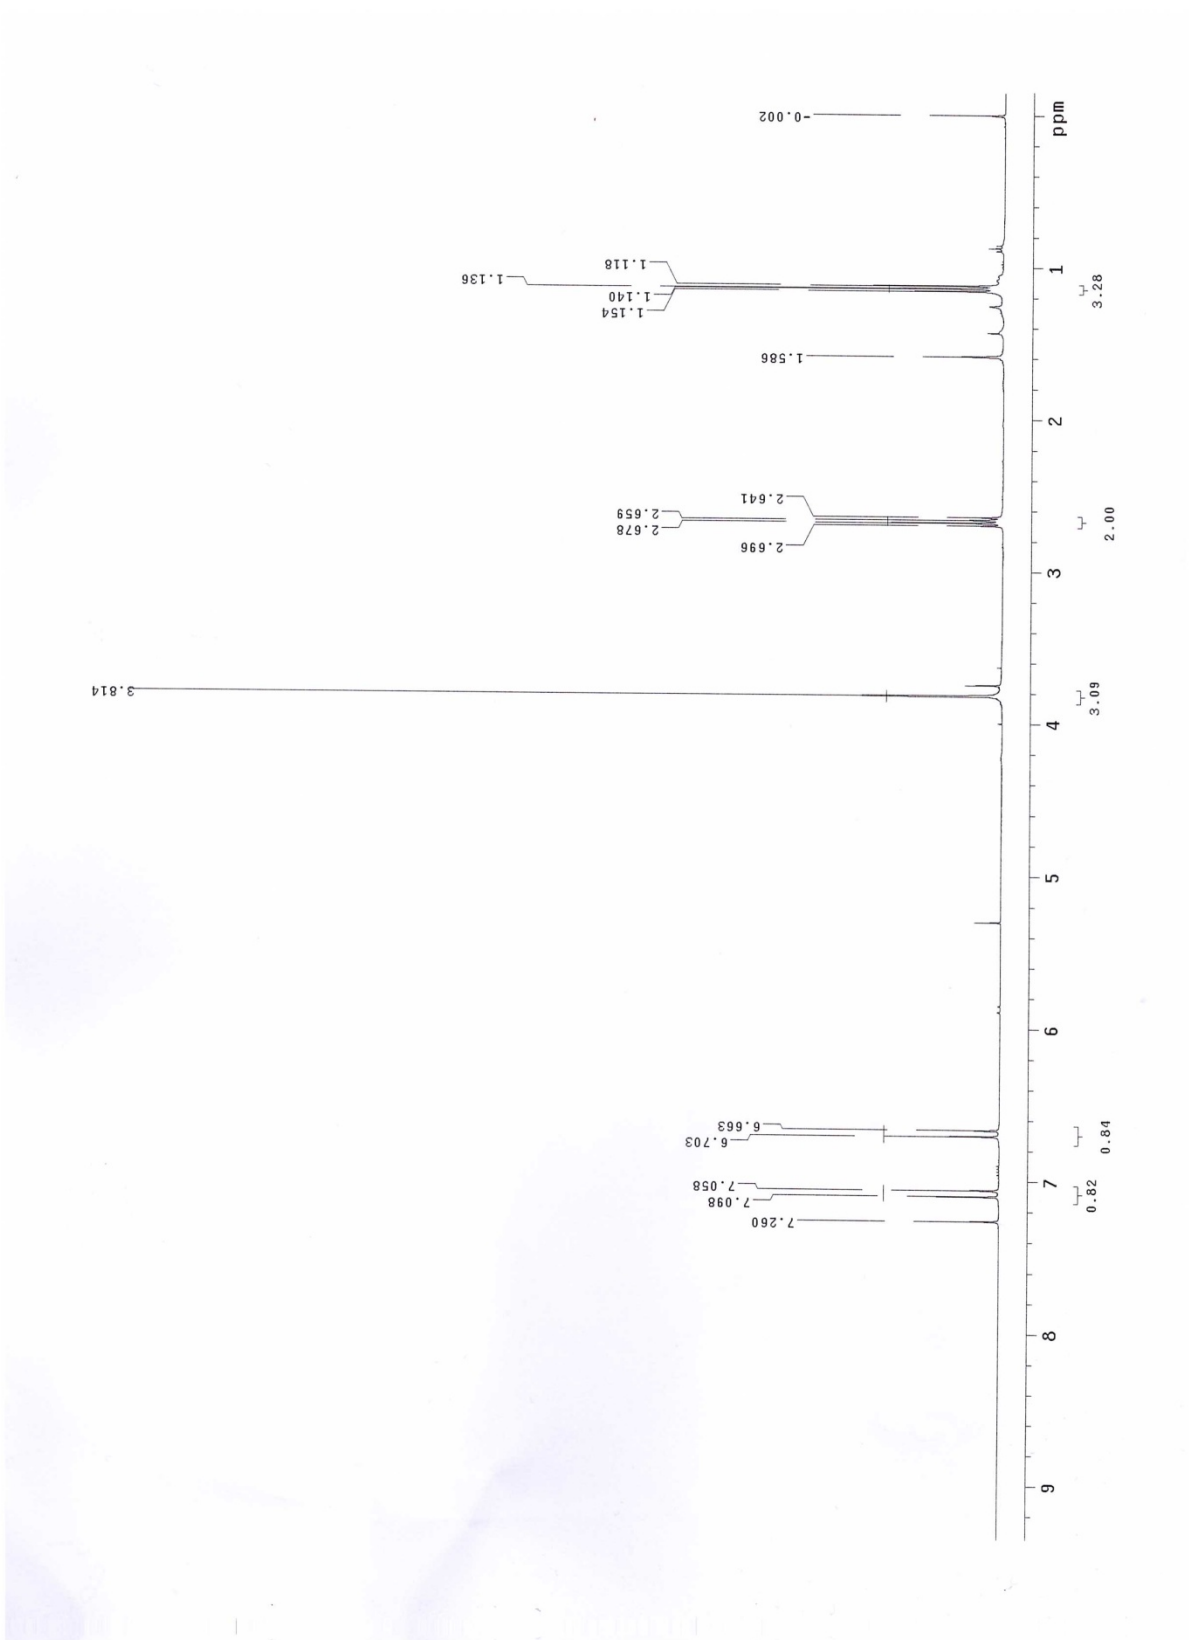

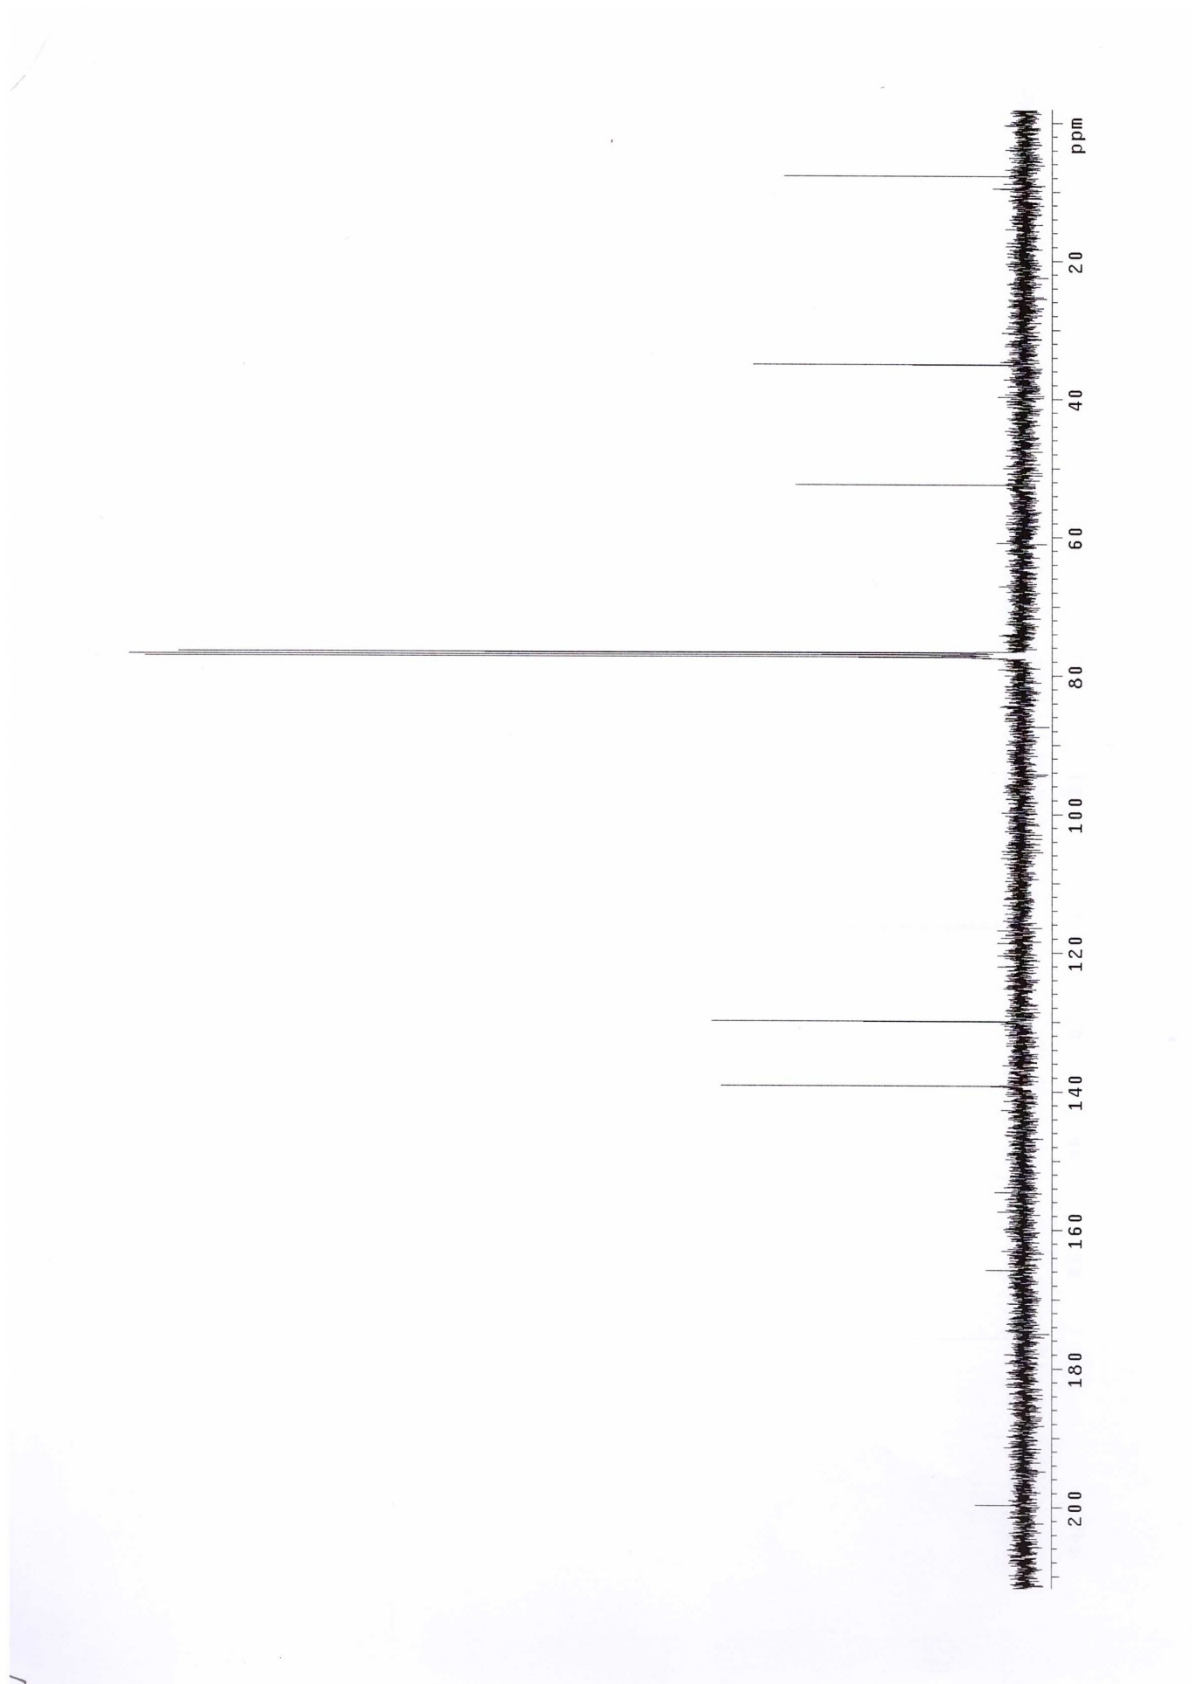

---

<sup>i</sup> J. Liu, X. Xie, S. Ma, *Synthesis*, **2012**, 1569-1576.

<sup>ii</sup> P. H. Fuller, J.-W. Kim, S. R. Chemler, *J. Am. Chem. Soc.* 2008, **130**, 17638-17639.
